# Supplementary material
Source: publisher figshare collection journal article supplement (https://acs.figshare.com/ndownloader/files/9139132)
Supplement: Supplementary file 1 [file 9139132]

data_20170719
_audit_creation_date              2017-07-19
_audit_creation_method
;
Olex2 1.2
(compiled 2015.01.26 svn.r3150 for OlexSys, GUI svn.r1)
;
_publ_contact_author_address      ?
_publ_contact_author_email        ?
_publ_contact_author_name         ''
_publ_contact_author_phone        ?
_publ_section_references
;
Dolomanov, O.V., Bourhis, L.J., Gildea, R.J, Howard, J.A.K. & Puschmann, H.
 (2009), J. Appl. Cryst. 42, 339-341.

Sheldrick, G.M. (2008). Acta Cryst. A64, 112-122.
;
_chemical_name_common             ?
_chemical_name_systematic         ?
_chemical_formula_moiety          'C22 H27 N O6'
_chemical_formula_sum             'C22 H27 N O6'
_chemical_formula_weight          401.44
_chemical_absolute_configuration  unk
_chemical_melting_point           ?
loop_
  _atom_type_symbol
  _atom_type_description
  _atom_type_scat_dispersion_real
  _atom_type_scat_dispersion_imag
  _atom_type_scat_source
 'C' 'C' 0.0181 0.0091 'International Tables Vol C Tables 4.2.6.8 and 6.1.1.4'
 'H' 'H' 0.0000 0.0000 'International Tables Vol C Tables 4.2.6.8 and 6.1.1.4'
 'N' 'N' 0.0311 0.0180 'International Tables Vol C Tables 4.2.6.8 and 6.1.1.4'
 'O' 'O' 0.0492 0.0322 'International Tables Vol C Tables 4.2.6.8 and 6.1.1.4'

_shelx_space_group_comment
;
The symmetry employed for this shelxl refinement is uniquely defined
by the following loop, which should always be used as a source of
symmetry information in preference to the above space-group names.
They are only intended as comments.
;
_space_group_crystal_system       'monoclinic'
_space_group_IT_number            4
_space_group_name_H-M_alt         'P 1 21 1'
_space_group_name_Hall            'P 2yb'
loop_
  _space_group_symop_operation_xyz
 'x, y, z'
 '-x, y+1/2, -z'

_cell_length_a                    7.467(3)
_cell_length_b                    9.477(5)
_cell_length_c                    14.485(5)
_cell_angle_alpha                 90
_cell_angle_beta                  97.593(8)
_cell_angle_gamma                 90
_cell_volume                      1016.1(8)
_cell_formula_units_Z             2
_cell_measurement_reflns_used     1165
_cell_measurement_temperature     293
_cell_measurement_theta_max       67.6
_cell_measurement_theta_min       23.8
_shelx_estimated_absorpt_T_max    ?
_shelx_estimated_absorpt_T_min    ?
_exptl_absorpt_coefficient_mu     0.786
_exptl_absorpt_correction_T_max   1.000
_exptl_absorpt_correction_T_min   0.578
_exptl_absorpt_correction_type    Multi-scan
_exptl_absorpt_process_details    ?
_exptl_absorpt_special_details    ?
_exptl_crystal_colour             Colorless
_exptl_crystal_density_diffrn     1.312
_exptl_crystal_density_meas       ?
_exptl_crystal_density_method     ''not measured''
_exptl_crystal_description        Prism
_exptl_crystal_F_000              428
_exptl_crystal_size_max           0.2
_exptl_crystal_size_mid           0.2
_exptl_crystal_size_min           0.2
_exptl_special_details
;
 ?
;
_exptl_transmission_factor_max    ?
_exptl_transmission_factor_min    ?
_diffrn_reflns_av_R_equivalents   0.0916
_diffrn_reflns_av_unetI/netI      0.0754
_diffrn_reflns_Laue_measured_fraction_full 0.969
_diffrn_reflns_Laue_measured_fraction_max 0.967
_diffrn_reflns_limit_h_max        8
_diffrn_reflns_limit_h_min        -8
_diffrn_reflns_limit_k_max        11
_diffrn_reflns_limit_k_min        -7
_diffrn_reflns_limit_l_max        13
_diffrn_reflns_limit_l_min        -17
_diffrn_reflns_number             5530
_diffrn_reflns_point_group_measured_fraction_full 0.743
_diffrn_reflns_point_group_measured_fraction_max 0.740
_diffrn_reflns_theta_full         67.679
_diffrn_reflns_theta_max          67.909
_diffrn_reflns_theta_min          3.078
_diffrn_ambient_temperature       293
_diffrn_detector                  CCD
_diffrn_detector_area_resol_mean  22.2222
_diffrn_measured_fraction_theta_full 0.969
_diffrn_measured_fraction_theta_max 0.967
_diffrn_measurement_details
;
scan:
	Number of images: 180
	           Slice: -134.0000 - 46.0000
	     Image width: 1.0000
	        Exp time: 15.0000
	   Rotation axis: Omega
	           Omega: 0.0000
	             Chi: 30.0000
	             Phi: 0.0000
	             XTD: 45.2001
	          2theta: -44.1596
scan:
	Number of images: 45
	           Slice: -21.0000 - 24.0000
	     Image width: 1.0000
	        Exp time: 15.0000
	   Rotation axis: Omega
	           Omega: 0.0000
	             Chi: 0.0000
	             Phi: 0.0000
	             XTD: 45.2001
	          2theta: -44.1596
scan:
	Number of images: 44
	           Slice: -112.0000 - -68.0000
	     Image width: 1.0000
	        Exp time: 15.0000
	   Rotation axis: Omega
	           Omega: 0.0000
	             Chi: 45.0000
	             Phi: 180.0000
	             XTD: 45.2001
	          2theta: -44.1596
scan:
	Number of images: 180
	           Slice: -180.0000 - 0.0000
	     Image width: 1.0000
	        Exp time: 15.0000
	   Rotation axis: Omega
	           Omega: 0.0000
	             Chi: 45.0000
	             Phi: 90.0000
	             XTD: 45.2001
	          2theta: -90.1596
scan:
	Number of images: 156
	           Slice: -180.0000 - -24.0000
	     Image width: 1.0000
	        Exp time: 15.0000
	   Rotation axis: Omega
	           Omega: 0.0000
	             Chi: 45.0000
	             Phi: 180.0000
	             XTD: 45.2001
	          2theta: -90.1596
scan:
	Number of images: 90
	           Slice: -112.0000 - -22.0000
	     Image width: 1.0000
	        Exp time: 15.0000
	   Rotation axis: Omega
	           Omega: 0.0000
	             Chi: 54.0000
	             Phi: 120.0000
	             XTD: 45.2001
	          2theta: -90.1596
scan:
	Number of images: 75
	           Slice: -123.0000 - -48.0000
	     Image width: 1.0000
	        Exp time: 15.0000
	   Rotation axis: Omega
	           Omega: 0.0000
	             Chi: 0.0000
	             Phi: 180.0000
	             XTD: 45.2001
	          2theta: -90.1596
;
_diffrn_measurement_device
;
AFC11 (Right): Eulerian 3 circle
;
_diffrn_measurement_device_type   'Rigaku Saturn944+ (2x2 bin mode)'
_diffrn_measurement_method        'profile data from \w-scans'
_diffrn_measurement_specimen_support Fiber
_diffrn_orient_matrix_type        d*Trek
_diffrn_orient_matrix_UB_11       -0.086200
_diffrn_orient_matrix_UB_12       -0.099494
_diffrn_orient_matrix_UB_13       0.030379
_diffrn_orient_matrix_UB_21       -0.071782
_diffrn_orient_matrix_UB_22       0.071322
_diffrn_orient_matrix_UB_23       0.029905
_diffrn_orient_matrix_UB_31       -0.030773
_diffrn_orient_matrix_UB_32       -0.004854
_diffrn_orient_matrix_UB_33       -0.062290
_diffrn_radiation_monochromator   'Graphite Monochromator'
_diffrn_radiation_type            CuK\a
_diffrn_radiation_wavelength      1.54178
_diffrn_source                    'Sealed Tube'
_diffrn_source_current            0.9
_diffrn_source_power              0.0
_diffrn_source_voltage            45.0
_diffrn_special_details
;
 ?
;
_reflns_Friedel_coverage          0.438
_reflns_Friedel_fraction_full     0.484
_reflns_Friedel_fraction_max      0.482
_reflns_number_gt                 1923
_reflns_number_total              2739
_reflns_special_details
;
 Reflections were merged by SHELXL according to the crystal
 class for the calculation of statistics and refinement.
 
 _reflns_Friedel_fraction is defined as the number of unique
 Friedel pairs measured divided by the number that would be
 possible theoretically, ignoring centric projections and
 systematic absences.
;
_reflns_threshold_expression      'I > 2\s(I)'
_computing_cell_refinement
;
CrystalClear-SM Expert 2.0 r4 (Rigaku, 2009)
;
_computing_data_collection
;
CrystalClear-SM Expert 2.0 r4 (Rigaku, 2009)
;
_computing_data_reduction
;
CrystalClear-SM Expert 2.0 r4 (Rigaku, 2009)
;
_computing_molecular_graphics     'Olex2 (Dolomanov et al., 2009)'
_computing_publication_material   'Olex2 (Dolomanov et al., 2009)'
_computing_structure_refinement   'ShelXL (Sheldrick, 2008)'
_computing_structure_solution     'ShelXS (Sheldrick, 2008)'
_refine_diff_density_max          0.295
_refine_diff_density_min          -0.304
_refine_diff_density_rms          0.071
_refine_ls_abs_structure_details
;
 Flack x determined using 598 quotients [(I+)-(I-)]/[(I+)+(I-)]
 (Parsons, Flack and Wagner, Acta Cryst. B69 (2013) 249-259).
;
_refine_ls_abs_structure_Flack    1.3(4)
_refine_ls_extinction_coef        0.090(10)
_refine_ls_extinction_expression  'Fc^*^=kFc[1+0.001xFc^2^\l^3^/sin(2\q)]^-1/4^'
_refine_ls_extinction_method      'SHELXL-2014/7 (Sheldrick 2014'
_refine_ls_goodness_of_fit_ref    1.158
_refine_ls_hydrogen_treatment     constr
_refine_ls_matrix_type            full
_refine_ls_number_parameters      268
_refine_ls_number_reflns          2739
_refine_ls_number_restraints      1
_refine_ls_R_factor_all           0.0931
_refine_ls_R_factor_gt            0.0709
_refine_ls_restrained_S_all       1.157
_refine_ls_shift/su_max           0.000
_refine_ls_shift/su_mean          0.000
_refine_ls_structure_factor_coef  Fsqd
_refine_ls_weighting_details
'w=1/[\s^2^(Fo^2^)+(0.1448P)^2^+0.1342P] where P=(Fo^2^+2Fc^2^)/3'
_refine_ls_weighting_scheme       calc
_refine_ls_wR_factor_gt           0.1877
_refine_ls_wR_factor_ref          0.2555
_refine_special_details           ?
_olex2_refinement_description
;
1. Fixed Uiso
 At 1.2 times of:
  All C(H) groups, All C(H,H) groups, All N(H) groups
 At 1.5 times of:
  All C(H,H,H) groups
2.a Ternary CH refined with riding coordinates:
 C8(H8), C18(H18), C21(H21)
2.b Secondary CH2 refined with riding coordinates:
 C13(H13A,H13B), C17(H17A,H17B)
2.c Aromatic/amide H refined with riding coordinates:
 C5(H5), N7(H7), C11(H11), C16(H16), C22(H22)
2.d Idealised Me refined as rotating group:
 C24(H24A,H24B,H24C), C26(H26A,H26B,H26C), C27(H27A,H27B,H27C), C28(H28A,H28B,
 H28C), C29(H29A,H29B,H29C)
;
_atom_sites_solution_hydrogens    geom
_atom_sites_solution_primary      direct
_atom_sites_solution_secondary    ?
loop_
  _atom_site_label
  _atom_site_type_symbol
  _atom_site_fract_x
  _atom_site_fract_y
  _atom_site_fract_z
  _atom_site_U_iso_or_equiv
  _atom_site_adp_type
  _atom_site_occupancy
  _atom_site_site_symmetry_order
  _atom_site_calc_flag
  _atom_site_refinement_flags_posn
  _atom_site_refinement_flags_adp
  _atom_site_refinement_flags_occupancy
  _atom_site_disorder_assembly
  _atom_site_disorder_group
 O1 O -0.2478(7) -0.0109(5) -0.2813(4) 0.0634(14) Uani 1 1 d . . . . .
 C2 C -0.0245(10) -0.3495(8) -0.2315(5) 0.0605(18) Uani 1 1 d . . . . .
 O3 O 0.0418(8) -0.7098(6) -0.1455(5) 0.0867(19) Uani 1 1 d . . . . .
 O4 O -0.3986(8) -0.0061(7) -0.0513(4) 0.0783(17) Uani 1 1 d . . . . .
 C5 C -0.4513(9) -0.1947(9) -0.2573(5) 0.065(2) Uani 1 1 d . . . . .
 H5 H -0.5205 -0.2698 -0.2833 0.078 Uiso 1 1 calc R . . . .
 C6 C 0.0611(10) -0.5922(8) -0.1977(6) 0.070(2) Uani 1 1 d . . . . .
 N7 N -0.4073(8) -0.1617(8) -0.4550(4) 0.0655(17) Uani 1 1 d . . . . .
 H7 H -0.4236 -0.0721 -0.4601 0.079 Uiso 1 1 calc R . . . .
 C8 C -0.2131(9) 0.0095(8) -0.1819(5) 0.0622(19) Uani 1 1 d . . . . .
 H8 H -0.1496 0.0982 -0.1652 0.075 Uiso 1 1 calc R . . . .
 C9 C -0.0365(10) -0.4710(8) -0.1795(6) 0.0620(19) Uani 1 1 d . . . . .
 O10 O 0.2719(8) -0.7019(6) -0.2894(6) 0.097(2) Uani 1 1 d . . . . .
 C11 C 0.1741(11) -0.4706(9) -0.3232(7) 0.075(2) Uani 1 1 d . . . . .
 H11 H 0.2450 -0.4710 -0.3713 0.091 Uiso 1 1 calc R . . . .
 O12 O -0.1325(8) -0.4724(6) -0.1054(4) 0.0765(17) Uani 1 1 d . . . . .
 C13 C 0.0911(10) -0.2155(11) -0.3601(6) 0.075(2) Uani 1 1 d . . . . .
 H13A H 0.1182 -0.1386 -0.3162 0.090 Uiso 1 1 calc R . . . .
 H13B H 0.1908 -0.2227 -0.3965 0.090 Uiso 1 1 calc R . . . .
 C14 C -0.1226(9) -0.2174(9) -0.2165(5) 0.063(2) Uani 1 1 d . . . . .
 C15 C 0.0808(9) -0.3526(8) -0.3052(5) 0.0617(19) Uani 1 1 d . . . . .
 C16 C -0.0966(10) -0.1202(10) -0.1513(6) 0.067(2) Uani 1 1 d . . . . .
 H16 H -0.0200 -0.1287 -0.0955 0.080 Uiso 1 1 calc R . . . .
 C17 C -0.0786(10) -0.1785(10) -0.4250(5) 0.068(2) Uani 1 1 d . . . . .
 H17A H -0.0754 -0.2288 -0.4831 0.082 Uiso 1 1 calc R . . . .
 H17B H -0.0751 -0.0785 -0.4388 0.082 Uiso 1 1 calc R . . . .
 C18 C -0.4014(10) 0.0049(9) -0.1488(5) 0.0645(19) Uani 1 1 d . . . . .
 H18 H -0.4662 0.0914 -0.1698 0.077 Uiso 1 1 calc R . . . .
 C19 C -0.2711(9) -0.1612(7) -0.2922(5) 0.0579(17) Uani 1 1 d . . . . .
 O20 O -0.5136(12) -0.3761(7) -0.4954(6) 0.110(2) Uani 1 1 d . . . . .
 C21 C -0.2599(10) -0.2107(9) -0.3903(5) 0.0645(19) Uani 1 1 d . . . . .
 H21 H -0.2703 -0.3138 -0.3892 0.077 Uiso 1 1 calc R . . . .
 C22 C -0.5092(11) -0.1206(10) -0.1922(6) 0.073(2) Uani 1 1 d . . . . .
 H22 H -0.6181 -0.1442 -0.1716 0.088 Uiso 1 1 calc R . . . .
 C23 C 0.1627(11) -0.5883(8) -0.2702(7) 0.073(2) Uani 1 1 d . . . . .
 C24 C -0.6511(12) -0.1803(12) -0.5805(6) 0.084(3) Uani 1 1 d . . . . .
 H24A H -0.7318 -0.1203 -0.5520 0.126 Uiso 1 1 calc GR . . . .
 H24B H -0.7191 -0.2528 -0.6157 0.126 Uiso 1 1 calc GR . . . .
 H24C H -0.5872 -0.1253 -0.6212 0.126 Uiso 1 1 calc GR . . . .
 C25 C -0.5214(11) -0.2453(10) -0.5079(5) 0.066(2) Uani 1 1 d . . . . .
 C26 C -0.3251(13) 0.1170(11) -0.0025(7) 0.088(3) Uani 1 1 d . . . . .
 H26A H -0.3963 0.1979 -0.0236 0.131 Uiso 1 1 calc GR . . . .
 H26B H -0.2029 0.1308 -0.0145 0.131 Uiso 1 1 calc GR . . . .
 H26C H -0.3270 0.1046 0.0631 0.131 Uiso 1 1 calc GR . . . .
 C27 C 0.1967(13) -0.7542(13) -0.0833(6) 0.091(3) Uani 1 1 d . . . . .
 H27A H 0.2986 -0.7628 -0.1170 0.137 Uiso 1 1 calc GR . . . .
 H27B H 0.1725 -0.8438 -0.0567 0.137 Uiso 1 1 calc GR . . . .
 H27C H 0.2229 -0.6857 -0.0345 0.137 Uiso 1 1 calc GR . . . .
 C28 C -0.3083(12) -0.5303(13) -0.1258(9) 0.099(3) Uani 1 1 d . . . . .
 H28A H -0.2997 -0.6262 -0.1462 0.148 Uiso 1 1 calc GR . . . .
 H28B H -0.3767 -0.4760 -0.1741 0.148 Uiso 1 1 calc GR . . . .
 H28C H -0.3674 -0.5281 -0.0708 0.148 Uiso 1 1 calc GR . . . .
 C29 C 0.1813(15) -0.8334(12) -0.3169(7) 0.096(3) Uani 1 1 d . . . . .
 H29A H 0.2559 -0.8886 -0.3523 0.144 Uiso 1 1 calc GR . . . .
 H29B H 0.0682 -0.8138 -0.3544 0.144 Uiso 1 1 calc GR . . . .
 H29C H 0.1599 -0.8850 -0.2624 0.144 Uiso 1 1 calc GR . . . .

loop_
  _atom_site_aniso_label
  _atom_site_aniso_U_11
  _atom_site_aniso_U_22
  _atom_site_aniso_U_33
  _atom_site_aniso_U_23
  _atom_site_aniso_U_13
  _atom_site_aniso_U_12
 O1 0.064(3) 0.053(3) 0.071(3) 0.003(2) 0.004(2) -0.004(2)
 C2 0.057(4) 0.046(4) 0.078(5) -0.002(3) 0.004(3) 0.007(3)
 O3 0.070(4) 0.059(4) 0.130(5) 0.025(3) 0.007(3) 0.003(3)
 O4 0.085(4) 0.075(4) 0.076(4) -0.005(3) 0.014(3) 0.000(3)
 C5 0.050(4) 0.066(5) 0.075(5) 0.003(4) -0.005(3) -0.003(4)
 C6 0.053(4) 0.045(4) 0.109(6) 0.001(4) 0.005(4) -0.003(3)
 N7 0.061(3) 0.066(4) 0.064(4) -0.002(3) -0.012(3) 0.004(3)
 C8 0.054(4) 0.056(5) 0.076(5) -0.006(4) 0.005(3) -0.002(4)
 C9 0.056(4) 0.053(5) 0.078(5) 0.001(4) 0.013(3) 0.005(3)
 O10 0.070(4) 0.052(4) 0.173(7) -0.015(4) 0.027(4) 0.005(3)
 C11 0.063(5) 0.062(5) 0.104(7) 0.004(5) 0.023(4) 0.005(4)
 O12 0.077(4) 0.067(4) 0.086(4) 0.005(3) 0.012(3) 0.002(3)
 C13 0.060(4) 0.085(6) 0.082(5) -0.002(5) 0.017(4) 0.001(4)
 C14 0.053(4) 0.077(5) 0.059(4) 0.004(4) 0.004(3) 0.005(4)
 C15 0.053(4) 0.051(4) 0.081(5) 0.000(4) 0.008(3) -0.005(3)
 C16 0.060(4) 0.073(5) 0.067(4) -0.008(4) 0.003(3) 0.004(4)
 C17 0.058(4) 0.080(6) 0.062(4) 0.005(4) -0.008(3) 0.012(4)
 C18 0.057(4) 0.061(5) 0.073(5) -0.002(4) 0.001(3) 0.006(4)
 C19 0.053(4) 0.041(4) 0.077(4) 0.004(3) -0.001(3) 0.003(3)
 O20 0.125(6) 0.058(5) 0.132(5) 0.001(4) -0.038(4) -0.005(4)
 C21 0.055(4) 0.071(5) 0.064(4) 0.000(4) -0.003(3) 0.006(4)
 C22 0.056(4) 0.082(6) 0.081(5) 0.003(5) 0.010(4) 0.001(4)
 C23 0.054(4) 0.045(4) 0.121(7) -0.003(5) 0.016(4) 0.004(3)
 C24 0.074(5) 0.089(7) 0.081(5) -0.007(5) -0.015(4) -0.004(5)
 C25 0.058(4) 0.071(6) 0.064(4) -0.002(4) -0.016(3) 0.005(4)
 C26 0.086(6) 0.087(7) 0.088(6) -0.012(5) 0.006(5) 0.005(5)
 C27 0.081(6) 0.105(8) 0.081(6) 0.006(6) -0.009(5) 0.012(5)
 C28 0.073(6) 0.097(8) 0.130(8) 0.026(7) 0.025(5) -0.006(5)
 C29 0.104(8) 0.087(8) 0.094(7) -0.004(6) 0.002(6) 0.017(6)

_geom_special_details
;
 All esds (except the esd in the dihedral angle between two l.s. planes)
 are estimated using the full covariance matrix.  The cell esds are taken
 into account individually in the estimation of esds in distances, angles
 and torsion angles; correlations between esds in cell parameters are only
 used when they are defined by crystal symmetry.  An approximate (isotropic)
 treatment of cell esds is used for estimating esds involving l.s. planes.
;
loop_
  _geom_bond_atom_site_label_1
  _geom_bond_atom_site_label_2
  _geom_bond_distance
  _geom_bond_site_symmetry_2
  _geom_bond_publ_flag
 O1 C8 1.441(9) . ?
 O1 C19 1.441(9) . ?
 C2 C9 1.385(11) . ?
 C2 C14 1.481(11) . ?
 C2 C15 1.407(11) . ?
 O3 C6 1.365(10) . ?
 O3 C27 1.432(11) . ?
 O4 C18 1.414(10) . ?
 O4 C26 1.435(12) . ?
 C5 C19 1.532(11) . ?
 C5 C22 1.295(12) . ?
 C6 C9 1.404(11) . ?
 C6 C23 1.375(13) . ?
 N7 C21 1.426(9) . ?
 N7 C25 1.330(10) . ?
 C8 C16 1.537(11) . ?
 C8 C18 1.545(10) . ?
 C9 O12 1.368(10) . ?
 O10 C23 1.400(10) . ?
 O10 C29 1.449(13) . ?
 C11 C15 1.361(11) . ?
 C11 C23 1.363(12) . ?
 O12 C28 1.417(11) . ?
 C13 C15 1.530(12) . ?
 C13 C17 1.516(11) . ?
 C14 C16 1.315(11) . ?
 C14 C19 1.548(10) . ?
 C17 C21 1.536(11) . ?
 C18 C22 1.524(12) . ?
 C19 C21 1.510(11) . ?
 O20 C25 1.253(11) . ?
 C24 C25 1.467(12) . ?

loop_
  _geom_angle_atom_site_label_1
  _geom_angle_atom_site_label_2
  _geom_angle_atom_site_label_3
  _geom_angle
  _geom_angle_site_symmetry_1
  _geom_angle_site_symmetry_3
  _geom_angle_publ_flag
 C19 O1 C8 104.2(5) . . ?
 C9 C2 C14 123.6(7) . . ?
 C9 C2 C15 118.6(7) . . ?
 C15 C2 C14 117.8(7) . . ?
 C6 O3 C27 116.9(7) . . ?
 C18 O4 C26 112.7(7) . . ?
 C22 C5 C19 121.3(8) . . ?
 O3 C6 C9 117.9(7) . . ?
 O3 C6 C23 123.7(7) . . ?
 C23 C6 C9 118.3(7) . . ?
 C25 N7 C21 124.4(7) . . ?
 O1 C8 C16 101.6(6) . . ?
 O1 C8 C18 104.8(6) . . ?
 C16 C8 C18 113.0(6) . . ?
 C2 C9 C6 120.4(7) . . ?
 O12 C9 C2 120.9(7) . . ?
 O12 C9 C6 118.6(7) . . ?
 C23 O10 C29 117.0(7) . . ?
 C15 C11 C23 119.6(7) . . ?
 C9 O12 C28 114.0(7) . . ?
 C17 C13 C15 115.0(7) . . ?
 C2 C14 C19 120.6(7) . . ?
 C16 C14 C2 132.0(7) . . ?
 C16 C14 C19 106.9(7) . . ?
 C2 C15 C13 116.6(7) . . ?
 C11 C15 C2 120.9(7) . . ?
 C11 C15 C13 122.4(7) . . ?
 C14 C16 C8 109.2(7) . . ?
 C13 C17 C21 116.8(7) . . ?
 O4 C18 C8 114.7(6) . . ?
 O4 C18 C22 107.0(7) . . ?
 C22 C18 C8 110.3(6) . . ?
 O1 C19 C5 105.5(6) . . ?
 O1 C19 C14 101.4(6) . . ?
 O1 C19 C21 113.0(6) . . ?
 C5 C19 C14 105.8(6) . . ?
 C21 C19 C5 114.0(6) . . ?
 C21 C19 C14 115.9(6) . . ?
 N7 C21 C17 111.0(6) . . ?
 N7 C21 C19 112.5(6) . . ?
 C19 C21 C17 114.0(6) . . ?
 C5 C22 C18 121.0(7) . . ?
 C6 C23 O10 121.7(8) . . ?
 C11 C23 C6 122.2(7) . . ?
 C11 C23 O10 115.9(8) . . ?
 N7 C25 C24 118.4(8) . . ?
 O20 C25 N7 119.5(7) . . ?
 O20 C25 C24 122.2(8) . . ?

_shelx_res_file
;
    20170719.res created by SHELXL-2014/7

TITL 20170719 in P21 #4
REM reset to P21 #4
CELL 1.54178 7.4673 9.4771 14.4853 90 97.593 90
ZERR 2 0.0028 0.0053 0.0054 0 0.008 0
LATT -1
SYMM -X,0.5+Y,-Z
SFAC C H N O
UNIT 44 54 2 12

L.S. 15
PLAN  5
TEMP 293.15
BOND
fmap 2
ACTA
OMIT -6 5 1
OMIT 1 6 10
OMIT 5 6 1
OMIT 5 3 8
OMIT 2 9 2
OMIT 2 9 4
OMIT 6 6 0
OMIT 1 9 2
OMIT -4 8 5
OMIT 5 6 7
OMIT -2 9 8
OMIT -1 6 12
REM <olex2.extras>
REM <HklSrc "%.\\20170719.hkl">
REM </olex2.extras>

WGHT    0.144800    0.134200
EXTI    0.089788
FVAR       1.79633
O1    4   -0.247806   -0.010888   -0.281260    11.00000    0.06441    0.05307 =
         0.07147    0.00295    0.00430   -0.00393
C2    1   -0.024536   -0.349509   -0.231535    11.00000    0.05652    0.04594 =
         0.07785   -0.00188    0.00403    0.00731
O3    4    0.041849   -0.709768   -0.145470    11.00000    0.06973    0.05869 =
         0.13004    0.02499    0.00659    0.00254
O4    4   -0.398644   -0.006113   -0.051288    11.00000    0.08513    0.07458 =
         0.07611   -0.00535    0.01417    0.00019
C5    1   -0.451272   -0.194705   -0.257252    11.00000    0.05008    0.06611 =
         0.07547    0.00252   -0.00519   -0.00349
AFIX  43
H5    2   -0.520464   -0.269844   -0.283302    11.00000   -1.20000
AFIX   0
C6    1    0.061138   -0.592183   -0.197697    11.00000    0.05319    0.04512 =
         0.10859    0.00098    0.00469   -0.00286
N7    3   -0.407329   -0.161728   -0.454963    11.00000    0.06076    0.06564 =
         0.06445   -0.00244   -0.01233    0.00437
AFIX  43
H7    2   -0.423592   -0.072083   -0.460057    11.00000   -1.20000
AFIX   0
C8    1   -0.213128    0.009487   -0.181913    11.00000    0.05415    0.05584 =
         0.07569   -0.00601    0.00533   -0.00242
AFIX  13
H8    2   -0.149625    0.098237   -0.165233    11.00000   -1.20000
AFIX   0
C9    1   -0.036511   -0.470961   -0.179528    11.00000    0.05613    0.05262 =
         0.07832    0.00093    0.01321    0.00473
O10   4    0.271852   -0.701915   -0.289354    11.00000    0.07044    0.05223 =
         0.17274   -0.01526    0.02730    0.00545
C11   1    0.174052   -0.470627   -0.323178    11.00000    0.06343    0.06201 =
         0.10409    0.00355    0.02323    0.00496
AFIX  43
H11   2    0.245039   -0.470968   -0.371316    11.00000   -1.20000
AFIX   0
O12   4   -0.132521   -0.472408   -0.105380    11.00000    0.07717    0.06691 =
         0.08566    0.00467    0.01201    0.00184
C13   1    0.091122   -0.215492   -0.360095    11.00000    0.05959    0.08458 =
         0.08172   -0.00233    0.01654    0.00126
AFIX  23
H13A  2    0.118165   -0.138635   -0.316243    11.00000   -1.20000
H13B  2    0.190810   -0.222737   -0.396513    11.00000   -1.20000
AFIX   0
C14   1   -0.122565   -0.217413   -0.216499    11.00000    0.05250    0.07657 =
         0.05913    0.00403    0.00369    0.00472
C15   1    0.080820   -0.352553   -0.305188    11.00000    0.05265    0.05130 =
         0.08088   -0.00014    0.00786   -0.00528
C16   1   -0.096638   -0.120246   -0.151315    11.00000    0.05980    0.07252 =
         0.06672   -0.00836    0.00290    0.00356
AFIX  43
H16   2   -0.019963   -0.128672   -0.095530    11.00000   -1.20000
AFIX   0
C17   1   -0.078570   -0.178528   -0.425040    11.00000    0.05832    0.07969 =
         0.06211    0.00541   -0.00776    0.01152
AFIX  23
H17A  2   -0.075353   -0.228779   -0.483135    11.00000   -1.20000
H17B  2   -0.075072   -0.078475   -0.438803    11.00000   -1.20000
AFIX   0
C18   1   -0.401396    0.004867   -0.148839    11.00000    0.05670    0.06136 =
         0.07341   -0.00243    0.00076    0.00609
AFIX  13
H18   2   -0.466235    0.091399   -0.169817    11.00000   -1.20000
AFIX   0
C19   1   -0.271084   -0.161161   -0.292197    11.00000    0.05259    0.04107 =
         0.07740    0.00399   -0.00124    0.00268
O20   4   -0.513624   -0.376076   -0.495405    11.00000    0.12532    0.05814 =
         0.13165    0.00105   -0.03799   -0.00510
C21   1   -0.259870   -0.210737   -0.390326    11.00000    0.05543    0.07070 =
         0.06443   -0.00001   -0.00326    0.00585
AFIX  13
H21   2   -0.270343   -0.313780   -0.389165    11.00000   -1.20000
AFIX   0
C22   1   -0.509151   -0.120573   -0.192199    11.00000    0.05608    0.08151 =
         0.08140    0.00296    0.00987    0.00099
AFIX  43
H22   2   -0.618095   -0.144228   -0.171630    11.00000   -1.20000
AFIX   0
C23   1    0.162744   -0.588339   -0.270222    11.00000    0.05431    0.04532 =
         0.12073   -0.00256    0.01621    0.00371
C24   1   -0.651092   -0.180302   -0.580459    11.00000    0.07438    0.08908 =
         0.08074   -0.00749   -0.01541   -0.00420
AFIX 137
H24A  2   -0.731809   -0.120346   -0.552011    11.00000   -1.50000
H24B  2   -0.719133   -0.252768   -0.615681    11.00000   -1.50000
H24C  2   -0.587189   -0.125276   -0.621161    11.00000   -1.50000
AFIX   0
C25   1   -0.521421   -0.245270   -0.507910    11.00000    0.05801    0.07087 =
         0.06360   -0.00222   -0.01644    0.00457
C26   1   -0.325134    0.116965   -0.002539    11.00000    0.08636    0.08657 =
         0.08849   -0.01225    0.00633    0.00458
AFIX 137
H26A  2   -0.396334    0.197914   -0.023626    11.00000   -1.50000
H26B  2   -0.202920    0.130789   -0.014475    11.00000   -1.50000
H26C  2   -0.326955    0.104552    0.063105    11.00000   -1.50000
AFIX   0
C27   1    0.196734   -0.754179   -0.083278    11.00000    0.08136    0.10482 =
         0.08141    0.00559   -0.00945    0.01228
AFIX 137
H27A  2    0.298595   -0.762768   -0.116978    11.00000   -1.50000
H27B  2    0.172499   -0.843816   -0.056652    11.00000   -1.50000
H27C  2    0.222931   -0.685721   -0.034515    11.00000   -1.50000
AFIX   0
C28   1   -0.308265   -0.530343   -0.125758    11.00000    0.07293    0.09726 =
         0.12952    0.02559    0.02502   -0.00613
AFIX 137
H28A  2   -0.299721   -0.626188   -0.146178    11.00000   -1.50000
H28B  2   -0.376719   -0.476030   -0.174078    11.00000   -1.50000
H28C  2   -0.367403   -0.528058   -0.070822    11.00000   -1.50000
AFIX   0
C29   1    0.181336   -0.833416   -0.316950    11.00000    0.10390    0.08672 =
         0.09386   -0.00417    0.00242    0.01718
AFIX 137
H29A  2    0.255932   -0.888584   -0.352322    11.00000   -1.50000
H29B  2    0.068168   -0.813828   -0.354390    11.00000   -1.50000
H29C  2    0.159920   -0.884986   -0.262425    11.00000   -1.50000
AFIX   0
HKLF 4

REM  20170719 in P21 #4
REM R1 =  0.0709 for    1923 Fo > 4sig(Fo)  and  0.0931 for all    2739 data
REM    268 parameters refined using      1 restraints

END

WGHT      0.1445      0.1344

REM Highest difference peak  0.295,  deepest hole -0.304,  1-sigma level  0.071
Q1    1  -0.3128 -0.3238 -0.3412  11.00000  0.05    0.30
Q2    1  -0.3969  0.2532  0.0238  11.00000  0.05    0.24
Q3    1   0.1106 -0.1617 -0.2941  11.00000  0.05    0.24
Q4    1  -0.7226 -0.1706 -0.0794  11.00000  0.05    0.24
Q5    1  -0.2292 -0.0174 -0.3228  11.00000  0.05    0.23
;
_shelx_res_checksum               34550
_shelx_hkl_file
;
   0   0   1    1.89    2.02
   0   0  -1    3.75    0.67
   0   0   2 3158.58   79.61
   0   0  -2 2704.78   64.54
   0   0   3 2031.61   56.94
   0   0  -3 1592.35   43.11
   0   0   4  129.81   13.18
   0   0   5 1326.10   50.69
   0   0   6  647.30   32.02
   0   0   7  990.30   47.90
   0   0   8  186.15   19.26
   0   0  -8  105.93   14.01
   0   0  -8  119.35   22.94
   0   0   9  702.20   40.47
   0   0  -9  412.87   29.99
   0   0  -9  391.56   26.06
   0   0  -9  441.15   29.02
   0   0  10  292.87   33.11
   0   0 -10  196.69   22.42
   0   0 -10  190.40   19.93
   0   0 -10  199.44   20.75
   0   0  11    4.08    7.46
   0   0 -11    3.07    8.41
   0   0 -11    1.38    4.17
   0   0  12   -0.01    1.89
   0   0 -12    5.10    6.58
   0   0  13    0.27    1.36
   0   0 -13    0.75    7.50
   0   0 -14   24.29    8.71
   0   0 -15    4.14    4.32
   0   0 -16    2.06    2.89
   0  -1   0    0.29    1.03
   0  -1   1 1394.58   36.68
   0  -1  -1 1440.90   38.13
   0  -1  -1 1347.77   35.07
   0   1   2 2262.78   63.65
   0  -1   2 2067.27   54.82
   0   1   3  403.56   24.43
   0  -1   3  356.12   16.71
   0   1  -3  358.15   15.85
   0   1   4 1501.34   49.56
   0  -1   4 1538.11   49.00
   0   1  -4 1482.12   43.78
   0   1   5  796.31   34.00
   0  -1   5  751.78   32.96
   0   1  -5  746.64   26.54
   0   1   6  445.35   26.70
   0  -1   6  404.91   24.40
   0   1  -6  396.08   18.42
   0   1   7  903.78   44.51
   0  -1   7 1009.27   48.87
   0   1   8 1173.42   75.84
   0  -1   8 1139.49   51.03
   0  -1  -8  743.08   37.57
   0   1  -8  797.93   41.08
   0   1  -8  759.98   38.29
   0   1  -8  797.77   58.91
   0   1   9   90.93   28.86
   0  -1   9   87.20   14.52
   0  -1  -9   57.38   11.33
   0   1  -9   59.61   12.52
   0   1  -9   64.23   15.86
   0   1  -9   70.81   44.61
   0   1  10  251.23   47.39
   0  -1  10  262.12   26.49
   0  -1 -10  192.92   20.97
   0   1 -10  182.24   23.74
   0   1 -10  176.85   20.02
   0   1 -10  172.87   19.77
   0   1  11   71.90   24.22
   0  -1  11   74.89   48.99
   0  -1 -11   57.57   14.73
   0   1 -11   61.40   16.04
   0   1 -11   52.60   11.93
   0   1 -11   61.42   39.37
   0   1  12    4.27    5.50
   0  -1  12    3.88    7.58
   0  -1 -12    5.13    6.63
   0   1 -12    5.72    8.87
   0   1 -12    4.09    4.78
   0  -1  13   93.75   20.34
   0  -1 -13  115.07   20.61
   0  -1 -13  105.89   23.28
   0   1 -13  108.10   23.56
   0   1 -13   94.77   19.31
   0  -1 -14   20.32   13.84
   0   1 -14   24.72   10.01
   0  -1 -15   11.48    5.07
   0   1 -15   16.19    7.72
   0  -1 -16    1.46    1.64
   0   1 -16    5.08    4.22
   0  -2   0 3298.08   82.99
   0  -2   1 4721.30  111.82
   0  -2  -1 4518.91  107.76
   0  -2   2 1860.81   52.06
   0  -2  -2 1784.51   51.15
   0  -2   3 2153.46   62.18
   0  -2  -3 2235.08   60.07
   0   2   4  936.57   38.32
   0  -2   4  966.83   36.16
   0   2  -4  928.55   35.49
   0   2   5  660.58   32.85
   0  -2   5  635.10   29.71
   0   2  -5  612.56   27.40
   0  -2   6 1478.04   54.47
   0   2  -6 1491.33   50.11
   0   2   7  961.98   46.15
   0  -2   7 1052.96   46.89
   0   2  -7  913.60   35.69
   0   2  -7  760.66   38.26
   0   2  -7  674.34   35.08
   0   2  -7  731.99   38.43
   0   2   8  639.71   36.96
   0  -2   8  675.33   51.85
   0  -2  -8  390.49   25.74
   0   2  -8  467.25   31.86
   0   2  -8  438.80   30.03
   0   2  -8  449.74   57.44
   0   2   9  184.59   42.90
   0  -2   9  242.12   53.33
   0  -2  -9  129.52   15.57
   0   2  -9  181.88   20.89
   0   2  -9  157.11   19.26
   0   2  -9  182.19   25.17
   0   2  10  176.72   64.40
   0  -2  10  208.32   22.17
   0  -2 -10  114.55   15.83
   0   2 -10  151.43   20.72
   0   2 -10  147.02   20.07
   0   2 -10  149.74   21.04
   0  -2  11  160.61   24.88
   0  -2 -11  164.34   22.97
   0  -2 -11  125.24   23.36
   0   2 -11  118.80   20.55
   0   2 -11  137.17   22.65
   0   2 -11  141.22   23.35
   0  -2  12   99.67   16.38
   0  -2 -12  116.78   18.88
   0  -2 -12   86.49   17.70
   0   2 -12  102.58   23.86
   0   2 -12   94.84   18.06
   0   2 -12  105.62   66.45
   0  -2 -13   85.95   19.01
   0   2 -13   92.17   20.91
   0   2 -13   90.67   18.53
   0   2 -14   68.08   17.91
   0   2 -14   54.32   13.10
   0   2 -15   23.31    8.69
   0   2 -16   15.37    5.94
   0  -3   0    1.81    3.87
   0  -3   1  424.40   18.42
   0  -3  -1  437.28   19.25
   0  -3   2 1501.70   46.34
   0  -3  -2 1503.62   47.17
   0  -3  -2 1477.07   43.90
   0  -3   3 1595.89   50.33
   0  -3  -3 1588.10   51.39
   0  -3  -3 1582.41   47.58
   0   3  -3 1595.62   54.02
   0  -3   4  483.80   24.50
   0  -3  -4  470.83   24.93
   0  -3  -4  475.82   21.94
   0   3  -4  481.42   27.59
   0   3   4  514.50   21.25
   0  -3   5  360.30   22.25
   0  -3  -5  370.45   23.32
   0  -3  -5  356.92   18.50
   0   3   5  354.08   14.39
   0   3  -5  353.92   43.12
   0  -3   6  938.03   41.59
   0  -3  -6  893.75   41.82
   0  -3  -6  894.73   36.37
   0   3  -6  969.93   44.17
   0  -3   7  362.20   37.15
   0  -3  -7  348.21   26.03
   0  -3  -7  312.82   19.67
   0   3  -7  354.60   24.67
   0   3  -7  252.88   22.47
   0   3  -7  267.15   24.98
   0  -3   8  848.60   44.30
   0  -3  -8  813.24   42.79
   0   3  -8  590.79   36.58
   0   3  -8  563.81   36.38
   0   3  -8  594.52   42.88
   0  -3   9   63.20   29.21
   0  -3  -9   54.78   12.43
   0   3  -9   39.08   10.04
   0   3  -9   38.24   11.77
   0   3  -9   53.43   33.72
   0  -3  10   28.68   13.65
   0  -3 -10   24.28    9.45
   0   3 -10   26.03   11.13
   0   3 -10   23.78   10.74
   0   3 -10   29.35   20.47
   0  -3  11   21.15   16.39
   0  -3 -11   32.17    9.86
   0   3 -11   22.55   11.47
   0   3 -11   20.28    9.20
   0   3 -11   30.17   15.45
   0  -3  12   66.02   13.94
   0  -3 -12   74.97   15.85
   0   3 -12   91.97   20.06
   0   3 -12   71.92   16.43
   0   3 -12   86.07   21.30
   0   3 -13   61.36   15.91
   0   3 -13   54.52   12.42
   0   3 -13   54.02   14.61
   0   3 -14    7.94    8.34
   0   3 -14    6.59    4.50
   0   3 -15   17.98    9.56
   0   3 -15   10.51    4.73
   0   3 -16   21.00    7.33
   0  -4   0 4678.83  121.58
   0  -4   1 1678.12   52.38
   0  -4  -1 1668.58   52.80
   0  -4   2   66.21    8.52
   0  -4  -2   65.73    9.32
   0   4  -2   72.81   11.62
   0  -4   3   67.73    8.52
   0  -4  -3   64.66    9.40
   0   4  -3   76.27   11.41
   0  -4   4 1935.13   63.42
   0  -4  -4 1916.63   64.89
   0  -4  -4 1790.12   54.34
   0   4  -4 2012.92   72.42
   0   4   4 2122.73   70.47
   0  -4   5  265.31   20.31
   0  -4  -5  282.41   22.55
   0  -4  -5  260.96   15.28
   0   4  -5  296.01   24.91
   0   4  -5  228.79   19.41
   0   4  -5  203.98   18.70
   0   4  -5  230.06   20.18
   0  -4   6  197.27   17.67
   0  -4  -6  186.07   18.41
   0   4  -6  206.77   19.98
   0   4  -6  133.97   14.59
   0   4  -6  159.39   17.34
   0   4  -6  151.25   17.21
   0   4  -6  161.14   18.20
   0  -4   7  250.31   21.64
   0  -4  -7  230.82   22.90
   0   4  -7  255.75   22.16
   0   4  -7  180.94   18.97
   0   4  -7  204.30   19.40
   0   4  -7  192.19   20.27
   0   4  -7  200.57   21.45
   0  -4   8   11.18    8.27
   0  -4  -8   10.60    5.74
   0   4  -8   10.12    6.60
   0   4  -8    7.42    4.75
   0   4  -8    9.26    5.50
   0   4  -8    0.35    9.12
   0   4  -8   13.39   11.33
   0  -4   9  232.00   33.16
   0  -4  -9  270.51   24.75
   0   4  -9  214.23   22.91
   0   4  -9  214.72   25.25
   0   4  -9  210.70   38.18
   0  -4  10    8.34    7.35
   0  -4 -10    9.92    5.68
   0   4 -10   10.01    7.36
   0   4 -10   10.48    7.38
   0   4 -10   11.01    6.62
   0  -4  11   11.24   17.49
   0  -4 -11   18.47    7.22
   0   4 -11   24.68   10.29
   0   4 -11   22.23   11.14
   0   4 -11   31.39   14.41
   0   4 -12    3.82    4.62
   0   4 -12    1.73   12.03
   0   4 -12    6.75   12.08
   0   4 -13   33.05   11.97
   0   4 -13   43.20   12.60
   0   4 -13   37.82   27.74
   0   4 -14    3.28    4.77
   0   4 -14    2.28    3.22
   0   4 -15    1.11    3.60
   0   4 -15    0.31    1.36
   0   4 -16    0.97    2.74
   0   5   0   -0.11    7.83
   0  -5   1  727.73   31.27
   0  -5  -1  695.99   30.79
   0   5  -1  824.14   41.00
   0   5  -1  731.29   36.96
   0  -5   2  556.94   27.08
   0  -5  -2  564.44   27.98
   0   5  -2  650.16   36.89
   0   5   2  672.93   36.61
   0   5  -2  566.03   33.16
   0  -5   3  247.01   18.44
   0  -5  -3  222.97   17.91
   0   5  -3  274.19   24.45
   0   5   3  269.15   20.06
   0   5  -3  216.57   20.86
   0  -5   4  249.49   19.64
   0  -5  -4  239.22   19.66
   0   5   4  270.54   19.11
   0   5  -4  271.14   47.37
   0   5  -4  228.09   21.99
   0   5  -4  195.04   17.95
   0   5  -4  204.69   18.78
   0  -5   5 1105.83   43.55
   0  -5  -5 1136.22   46.88
   0   5  -5 1135.08   57.07
   0   5  -5  947.69   45.12
   0   5  -5  869.05   42.46
   0   5  -5  881.38   44.01
   0  -5   6  660.58   34.80
   0  -5  -6  683.55   38.89
   0   5  -6  712.75   41.12
   0   5  -6  465.17   28.41
   0   5  -6  494.98   33.19
   0   5  -6  550.96   36.19
   0   5  -6  551.83   36.16
   0  -5   7   18.71   18.26
   0  -5  -7   22.95    7.68
   0   5  -7   21.38   12.26
   0   5  -7   14.81    5.75
   0   5  -7   20.23    9.89
   0   5  -7   20.51    8.05
   0   5  -7   21.54    9.99
   0  -5   8   11.83   15.22
   0  -5  -8   23.03    7.71
   0   5  -8   17.25   14.30
   0   5  -8   11.21    5.55
   0   5  -8   17.49    7.30
   0   5  -8   17.75    8.38
   0  -5   9    5.95    8.33
   0  -5  -9    9.72    5.38
   0   5  -9    9.29    6.01
   0   5  -9    8.79    7.20
   0   5  -9    7.27    7.28
   0   5  -9   14.25   13.68
   0  -5 -10   97.75   15.80
   0   5 -10   95.69   18.49
   0   5 -10   81.44   17.97
   0   5 -10   98.22   24.01
   0   5 -11    0.48    4.99
   0   5 -11   -8.77   10.09
   0   5 -11    0.11    3.74
   0   5 -12   19.06   14.57
   0   5 -12   14.39   11.07
   0   5 -12   20.60   21.49
   0   5 -13   39.35   11.20
   0   5 -13   45.96   12.32
   0   5 -13   33.32   21.02
   0   5 -14   11.33    5.68
   0   5 -14   14.56    6.60
   0   5 -15    7.60    5.19
   0   5 -15    3.82    3.26
   0   6   0 3783.19  135.07
   0  -6  -1  374.35   22.30
   0   6  -1  428.15   36.67
   0   6   1  455.79   31.56
   0   6   1  414.01   28.62
   0   6  -1  401.44   32.70
   0  -6  -2  165.09   15.66
   0   6   2  195.60   20.25
   0   6  -2  202.19   22.66
   0   6   2  174.78   18.06
   0   6  -2  166.28   20.63
   0   6  -2  136.10   14.50
   0  -6  -3  308.90   21.54
   0   6  -3  344.89   30.18
   0   6   3  343.98   30.61
   0   6   3  296.87   22.51
   0   6  -3  299.69   29.70
   0   6  -3  259.73   21.44
   0   6  -3  243.28   21.04
   0  -6  -4  299.18   21.93
   0   6   4  337.92   26.04
   0   6  -4  335.39   36.35
   0   6  -4  292.64   28.24
   0   6  -4  269.58   23.36
   0   6  -4  272.53   23.48
   0  -6  -5  152.10   15.70
   0   6  -5  157.78   35.28
   0   6  -5  153.75   33.64
   0   6  -5  133.75   17.31
   0   6  -5  139.57   56.25
   0  -6  -6   55.34   10.88
   0   6  -6   65.30   33.23
   0   6  -6   59.43   15.42
   0   6  -6   54.64   12.14
   0   6  -6   62.63   46.46
   0  -6  -7  430.58   36.13
   0   6  -7  506.09   43.22
   0   6  -7  458.85   42.30
   0   6  -8  468.92   44.97
   0   6  -8  586.87   51.23
   0   6  -8  509.78   48.36
   0   6  -8  523.53   48.07
   0   6  -9   22.39    7.78
   0   6  -9   26.22   11.71
   0   6  -9   29.18   16.36
   0   6 -10    1.00    2.78
   0   6 -10   18.96    9.25
   0   6 -10   16.69   12.26
   0   6 -11    0.91    2.16
   0   6 -11   60.04   18.05
   0   6 -11   53.58   43.50
   0   6 -12    0.32    1.51
   0   6 -12   24.10    9.28
   0   6 -12   22.95   18.63
   0   6 -13    0.30    1.13
   0   6 -13    4.13    4.09
   0   6 -13    0.66    3.84
   0   6 -14    0.33    0.96
   0   6 -14   39.10    8.40
   0   7   0    1.26    7.14
   0   7   1  673.30   40.30
   0   7  -1  645.95   41.21
   0   7   1  645.18   38.14
   0   7  -1  642.99   40.57
   0   7   2  224.47   22.64
   0   7  -2  231.31   26.21
   0   7   2  209.88   21.83
   0   7  -2  225.59   25.96
   0   7   3    9.47    8.06
   0   7  -3   11.10    7.39
   0   7   3    8.87    5.53
   0   7  -3   10.34    8.84
   0   7  -3    6.35    7.56
   0   7  -4   21.38   11.68
   0   7  -4   13.42    5.80
   0   7  -4   18.47   14.99
   0   7  -5  228.28   29.99
   0   7  -5  203.35   24.08
   0   7  -5  190.43   23.32
   0   7  -6  323.67   35.76
   0   7  -6  314.39   35.08
   0   7  -6  292.15   31.61
   0   7  -6  276.07   31.86
   0   7  -7  249.18   28.48
   0   7  -7  308.32   34.41
   0   7  -7  258.35   29.20
   0   7  -7  267.86   32.83
   0   7  -8  306.48   40.45
   0   7  -8  325.04   42.09
   0   7  -8  302.83   38.78
   0   7  -9    9.36    5.89
   0   7  -9    5.52    4.84
   0   7  -9   12.12   14.13
   0   7 -10   88.35   19.29
   0   7 -10   90.90   20.02
   0   7 -11    2.65    4.58
   0   7 -11    1.61    5.21
   0   7 -13   13.01   13.16
   0   8   0 1277.96   84.29
   0   8   0 1435.10   94.39
   0   8   1  167.11   22.33
   0   8  -1  164.69   28.26
   0   8   1  184.62   28.03
   0   8  -1  174.54   25.78
   0   8   2  611.96   50.11
   0   8  -2  628.50   53.85
   0   8   2  716.54   57.23
   0   8  -3  243.07   29.11
   0   8   3  251.12   27.27
   0   8  -3  270.61   34.22
   0   8  -4   59.34   47.92
   0   8  -4   84.35   18.55
   0   8  -4   52.36   34.42
   0   8  -5   20.34   29.52
   0   8  -5   42.06   15.15
   0   8  -5   25.65   24.67
   0   8  -5   27.67   16.50
   0   8  -6  262.50   29.12
   0   8  -6  194.14   20.95
   0   8  -6  185.41   20.80
   0   8  -7  112.72   18.62
   0   8  -7   85.63   13.93
   0   8  -7   86.82   14.91
   0   8  -8    2.80    4.25
   0   8  -8    3.32    3.94
   0   8  -8    2.20    6.55
   0   8  -9   70.94   12.75
   0   8  -9   59.44   12.02
   0   8  -9   56.78   11.65
   0   8 -10   13.09   14.65
   0   8 -10    7.20   20.19
   0   8 -11    6.74    6.40
   0   8 -12    1.33    2.18
   0   9   0    2.06    5.87
   0   9   1  420.17   34.32
   0   9  -1  401.97   35.39
   0   9   2   26.09    8.45
   0   9  -2   61.71   16.65
   0   9  -3   65.49   18.67
   0   9  -4   16.28   12.96
   0   9  -5   22.70   16.61
   0   9  -6  240.06   26.65
   0   9  -7   50.94   12.53
   0   9  -7    0.10    1.22
   0   9  -8    8.29    4.97
   0   9  -8    0.36    1.33
   0   9  -8    0.25    2.12
   0   9  -9   18.80    5.95
   0   9  -9    0.27    1.28
   0   9  -9    0.24    0.58
   0  10   0  153.36   19.60
   0  10   1    0.15    1.47
   0  10  -1   65.17   57.71
   0  10   2    0.66    1.73
   0  10  -3    9.29    6.23
   0  10  -4   32.53   11.42
   0  10  -5   68.71   12.91
   0  10  -6    1.13    2.70
   0  10  -7   17.62    6.37
   0  11   0    0.51    1.22
   0  11  -1    0.09    1.44
   0  11  -2    3.11    3.57
   0  11  -3    1.95    3.74
   0  11  -4    5.60    3.85
   1   0 -16   31.42    8.40
   1   0 -15   18.27    7.55
   1   0 -14    3.62    5.52
   1   0 -13    2.54    6.46
   1   0 -13   -0.36    6.97
  -1   0  12    7.41   12.83
   1   0 -12   13.31   10.21
  -1   0  11   33.91   23.75
   1   0 -11   28.91   10.78
  -1   0  10   11.00    8.49
   1   0 -10    7.52    6.01
  -1   0   9  736.22   39.94
   1   0  -9  597.02   36.75
  -1   0   8  172.11   20.46
   1   0  -8  110.76   14.40
  -1   0   7   38.99   10.80
  -1   0   6   75.37   14.64
  -1   0   5 1293.68   48.40
  -1   0   4 8211.87  210.18
  -1   0   3 2898.25   77.07
   1   0  -2 3361.44   85.05
   1   0  -1 2974.60   75.93
   1   0   0 1184.84   32.04
   1   0   0 1262.30   34.01
   1   0   1    1.44    1.95
   1   0   2 9999.99  231.57
   1   0   3 1288.95   41.57
   1   0   4   56.79    9.63
   1   0   5   10.21    6.57
  -1   0  -5    4.65    2.99
   1   0   6   24.58   18.28
   1   0   7  342.81   25.99
   1   0   8 1549.64   69.09
   1   0   8 1232.34   61.98
  -1   0  -8  936.15   43.63
   1   0   9  370.75   30.13
   1   0   9  317.55   27.39
  -1   0  -9  244.73   22.61
   1   0  10   73.76   36.90
  -1   0 -10   49.51   12.55
  -1   0 -10   39.39   27.71
   1   0  11   36.54   31.83
  -1   0 -11   26.33   10.79
  -1   0 -11   26.82   10.15
   1   0  12   10.31   13.17
  -1   0 -12    9.91    7.62
  -1   0 -12    7.02    5.09
  -1   0 -13   94.46   19.11
  -1   0 -14    6.06    6.59
  -1   0 -15   65.52   12.32
  -1   0 -16    1.33    1.90
   1   1 -17   12.38    4.73
   1  -1 -16    9.79    4.13
   1   1 -16   12.38    5.91
   1  -1 -15   33.87    8.66
   1   1 -15   45.29   11.09
   1  -1 -14   25.25    8.13
   1   1 -14   30.55   10.45
   1  -1 -13   51.45   15.20
   1  -1 -13   45.34   13.05
   1   1 -13   40.35   14.76
  -1  -1  12    1.02    1.70
   1  -1 -12    6.11    9.73
   1  -1 -12    1.51    6.03
   1   1 -12    3.05    6.32
   1   1 -12    1.01    4.68
  -1  -1  11   65.21   43.54
   1  -1 -11   85.65   17.26
   1  -1 -11   53.18   13.65
   1   1 -11   67.66   17.07
   1   1 -11   58.69   12.70
  -1   1  10  115.25   34.37
  -1  -1  10  109.24   28.89
   1  -1 -10   83.49   15.09
   1   1 -10   87.69   17.43
   1   1 -10   84.58   14.26
   1   1 -10  102.77   17.85
  -1   1   9  818.32   43.26
  -1  -1   9  820.71   43.29
   1  -1  -9  567.18   34.36
   1   1  -9  585.42   36.96
   1   1  -9  555.76   33.08
   1   1  -9  590.05   42.08
  -1   1   8  359.49   34.30
  -1  -1   8  350.78   48.23
   1  -1  -8  221.79   19.44
   1   1  -8  252.05   22.20
   1   1  -8  233.52   20.34
   1   1  -8  281.85   23.05
  -1   1   7 1527.86   61.96
  -1  -1   7 1867.90   70.80
  -1   1   6 2064.78   71.33
  -1  -1   6 2000.55   69.83
  -1   1   5  909.61   38.19
  -1  -1   5  937.00   41.21
  -1   1   4 2264.61   67.12
  -1  -1   4 2378.79   67.07
   1   1  -4 2543.79   73.34
  -1  -1   3  417.23   24.68
   1  -1  -3  488.22   21.84
   1   1  -3  436.54   19.10
  -1  -1   2  258.61   12.37
   1  -1  -2  281.25   14.34
   1   1  -2  298.68   14.86
   1  -1  -1 2972.89   77.73
   1  -1  -1 2693.50   70.65
   1   1  -1 3080.83   79.92
   1  -1   0 5607.28  315.12
   1   1   0 5174.39  150.08
   1   1   1 3485.31   85.09
   1  -1   1 4200.17  106.09
   1   1   2 7320.56  174.93
   1  -1   2 7805.20  183.71
   1   1   3 2229.71   67.60
   1  -1   3 1985.28   59.80
   1   1   4 2572.58   74.84
   1  -1   4 2404.89   73.12
   1   1   5 1057.10   47.15
   1  -1   5 1050.62   42.95
   1   1   6  199.67   17.67
   1  -1   6  182.04   41.66
  -1   1  -6  164.28   12.20
   1   1   7   36.42   27.76
   1  -1   7   38.67    9.65
   1  -1   7   32.36   22.62
   1   1   8  308.27   38.10
   1  -1   8  346.39   85.48
   1  -1   8  260.78   22.38
   1   1   8  258.74   21.20
  -1   1  -8  216.90   19.70
   1   1   9  615.49   56.43
   1  -1   9  689.16   41.25
   1   1   9  531.51   34.62
   1  -1   9  561.92   49.45
  -1   1  -9  504.15   33.42
   1   1  10  285.44   28.44
   1  -1  10  306.39   87.83
  -1   1 -10  208.44   23.48
  -1  -1 -10  198.77   22.17
  -1   1 -10  211.94   30.59
   1   1  11    7.01    5.87
   1  -1  11    8.98    8.36
  -1  -1 -11    5.84    7.12
  -1   1 -11    7.54    6.82
  -1   1 -11    7.37    7.90
  -1   1 -11    7.45    8.52
   1   1  12  129.03   30.48
   1  -1  12  146.90   21.05
  -1  -1 -12  129.09   21.85
  -1   1 -12  132.67   23.18
  -1   1 -12  127.95   21.41
  -1   1 -12  121.31   23.61
  -1  -1 -13   16.34    7.68
  -1   1 -13   15.13    9.23
  -1   1 -13   13.85    5.88
  -1  -1 -14   24.12    8.44
  -1   1 -14   29.05   10.61
  -1   1 -14   16.65   11.17
  -1  -1 -15  105.52   14.65
  -1   1 -15  115.60   18.07
  -1   1 -16   89.75   12.83
   1   2 -17    4.46    3.25
   1   2 -16    4.83    3.71
   1   2 -15    2.29    4.09
   1   2 -14  187.92   34.35
   1   2 -14  159.80   27.27
   1  -2 -13   81.65   16.95
   1   2 -13  108.81   23.54
   1   2 -13   91.18   18.98
  -1  -2  12  141.84   26.21
   1  -2 -12  206.84   26.55
   1  -2 -12  144.85   20.92
   1   2 -12  165.81   27.01
   1   2 -12  158.33   23.49
  -1  -2  11  173.58   24.60
   1  -2 -11  173.96   25.05
   1  -2 -11  129.53   19.51
   1   2 -11  160.96   26.28
   1   2 -11  135.07   22.52
   1   2 -11  156.75   24.09
  -1  -2  10   39.02   20.94
   1  -2 -10   51.09   12.56
   1  -2 -10   34.50    9.51
   1   2 -10   29.50   11.18
   1   2 -10   31.27    9.81
   1   2 -10   40.07   20.86
  -1  -2   9  232.39   22.98
   1  -2  -9  252.18   24.88
   1  -2  -9  152.56   17.82
   1   2  -9  173.70   20.33
   1   2  -9  160.62   19.50
   1   2  -9  177.48   21.34
  -1  -2   8  621.92   49.03
   1  -2  -8  624.04   37.64
   1  -2  -8  347.06   23.36
   1   2  -8  478.88   32.03
   1   2  -8  444.93   30.41
   1   2  -8  488.72   35.87
  -1  -2   7  142.17   15.87
   1  -2  -7  138.02   17.08
   1   2  -7  107.06   13.80
   1   2  -7  100.43   13.18
  -1  -2   6  704.77   36.23
   1  -2  -6  728.72   36.04
   1   2  -6  739.53   34.00
  -1  -2   5  619.11   37.26
   1  -2  -5  670.11   32.48
   1   2  -5  658.40   49.69
  -1  -2   4 4272.70  111.21
   1  -2  -4 4045.77  108.97
   1   2  -4 4729.07  120.91
  -1  -2   3    2.66    2.56
   1  -2  -3    5.38    4.29
   1  -2  -3    6.09    7.15
   1   2  -3    2.85    3.17
  -1  -2   2 3327.90   81.66
   1  -2  -2 3540.40   95.30
   1  -2  -2 3455.72   94.08
   1   2  -2 3643.94  117.86
  -1  -2   1 1042.79   25.39
   1  -2  -1 1368.57   42.96
   1  -2  -1 1423.46   43.97
   1   2  -1 1442.69   47.00
  -1  -2   0  164.45    5.17
   1  -2   0  193.02   12.44
   1  -2   0  196.24   14.83
   1  -2   1 5066.97  124.68
  -1  -2  -1 4466.51  103.60
   1   2   1 5339.28  128.00
   1   2   2 5468.59  129.72
   1  -2   2 6856.87  166.00
   1   2   2 6744.10  160.61
   1   2   3 2496.32   70.46
   1  -2   3 2678.33   78.17
  -1  -2  -3 2214.48   54.11
   1   2   4  130.92   12.33
   1  -2   4  126.03   12.83
   1   2   5   22.47   13.17
   1  -2   5   18.64    7.58
   1  -2   6 1768.08   66.16
  -1   2  -6 1793.60   58.70
   1   2   7  121.52   15.67
   1  -2   7  139.13   17.69
  -1   2  -7  107.65   18.87
   1  -2   7  101.22   14.07
  -1   2  -7   96.80   37.05
   1   2   8  196.49   20.17
   1  -2   8  206.51   23.31
   1  -2   8  160.08   40.97
   1   2   8  142.73   14.90
  -1   2  -8  143.15   18.02
   1   2   9   10.89    9.20
   1  -2   9   16.49   12.36
  -1   2  -9   11.37    8.01
  -1  -2  -9    7.15    5.17
  -1   2  -9    9.36    5.29
   1   2  10  683.43   40.63
   1  -2  10  772.47   56.57
  -1  -2 -10  537.32   33.63
  -1   2 -10  621.73   43.24
  -1   2 -10  595.66   51.11
  -1   2 -10  628.03   51.30
   1   2  11  145.78   20.63
   1  -2  11  150.47   21.48
  -1  -2 -11  115.93   19.09
  -1   2 -11  127.39   22.34
  -1   2 -11  130.83   23.44
  -1   2 -11  130.69   52.58
   1   2  12  102.00   21.92
   1  -2  12  110.70   39.04
  -1  -2 -12   94.38   19.57
  -1   2 -12  120.28   24.01
  -1   2 -12  114.68   21.86
  -1   2 -12  108.26   45.97
  -1  -2 -13   21.19    6.90
  -1   2 -13   34.24   11.26
  -1   2 -13   31.52    9.64
  -1   2 -13   30.81    9.70
  -1   2 -14  113.67   19.31
  -1   2 -14   95.89   14.85
  -1   2 -15    2.63    4.46
  -1   2 -15    0.40    1.00
  -1   2 -16   33.69    8.32
   1   3 -16    7.41    4.22
   1   3 -15   15.96    7.94
   1   3 -15    6.29    7.82
   1   3 -14   29.61   12.30
   1   3 -14   31.45    9.59
   1   3 -13  129.07   21.37
   1   3 -13  123.06   18.80
  -1  -3  12    4.52    9.93
   1  -3 -12   21.80    9.21
   1   3 -12   21.44   11.13
   1   3 -12   17.40    9.36
   1   3 -12   20.09   11.55
  -1  -3  11  166.94   21.07
   1  -3 -11  201.90   25.63
   1   3 -11  182.76   25.89
   1   3 -11  169.85   25.25
   1   3 -11  177.10   26.79
  -1  -3  10  129.27   16.19
   1  -3 -10  162.90   21.47
   1  -3 -10  135.62   16.15
   1   3 -10  117.86   18.93
   1   3 -10  123.41   23.33
  -1  -3   9  349.69   26.39
   1  -3  -9  386.37   31.89
   1  -3  -9  369.11   26.30
   1   3  -9  283.41   26.23
   1   3  -9  278.42   27.31
   1   3  -9  322.09   30.49
  -1  -3   8  213.66   20.48
   1  -3  -8  239.79   24.75
   1  -3  -8  217.95   20.42
   1   3  -8  205.30   17.90
   1   3  -8  166.00   19.49
   1   3  -8  155.50   19.23
   1   3  -8  172.49   20.93
  -1  -3   7  126.58   26.00
   1  -3  -7  130.11   16.86
   1  -3  -7  113.73   16.82
   1   3  -7  128.93   44.09
   1   3  -7  108.51   14.51
   1   3  -7   96.41   14.23
   1   3  -7  111.00   15.08
  -1  -3   6  778.39   42.10
   1  -3  -6  908.90   44.37
   1  -3  -6  832.16   38.77
   1   3  -6  851.15   40.25
   1   3  -6  584.18   32.77
  -1  -3   5  179.54   18.30
   1  -3  -5  216.72   19.01
   1  -3  -5  221.28   18.32
   1   3  -5  198.20   17.30
   1  -3  -4  217.47   17.41
   1  -3  -4  226.04   20.59
   1   3  -4  225.47   18.65
  -1  -3   3 3453.16   85.81
   1  -3  -3 3802.56  107.36
   1  -3  -3 3902.96  106.40
   1   3  -3 3842.56  115.27
  -1  -3   2  984.05   28.75
   1  -3  -2 1066.47   39.88
   1  -3  -2 1079.48   39.21
  -1  -3   1  350.40   11.78
   1  -3  -1  402.54   21.29
   1  -3  -1  410.94   21.07
   1   3  -1  436.05   23.63
  -1  -3   0  710.21   20.55
   1  -3   0  815.05   32.25
   1   3   0  896.02   35.24
   1  -3   1  228.66   15.52
  -1  -3  -1  210.91   10.06
   1   3   1  250.81   17.62
   1  -3   2  568.62   27.13
  -1  -3  -2  543.92   21.20
   1   3   2  657.22   26.79
   1  -3   3  733.26   32.81
  -1  -3  -3  700.53   27.45
   1   3   3  837.59   29.91
   1  -3   4  568.73   29.65
   1   3   4  575.52   22.33
   1   3   5  848.37   36.79
   1  -3   5  949.66   42.85
   1   3   6  578.18   30.58
   1  -3   6  637.73   35.34
  -1   3  -6  583.75   31.75
   1  -3   6  447.75   29.57
  -1   3  -6  449.47   30.12
   1   3   7  281.79   22.18
   1  -3   7  308.31   25.40
  -1   3  -7  260.22   31.22
   1  -3   7  220.37   20.68
  -1   3  -7  211.02   22.04
   1   3   8  623.96   36.16
   1  -3   8  682.36   41.24
  -1   3  -8  493.55   34.91
  -1   3  -8  488.38   38.31
   1   3   9    7.81    8.21
   1  -3   9   11.62    6.24
  -1   3  -9    8.51    7.94
  -1   3  -9    9.77    7.90
  -1   3  -9   11.06   10.69
   1  -3  10  103.31   45.41
  -1  -3 -10  110.18   18.20
  -1   3 -10   91.10   17.78
  -1   3 -10   94.09   19.20
  -1   3 -10  101.09   29.85
   1  -3  11   27.80   27.70
  -1  -3 -11   34.45   10.15
  -1   3 -11   26.19   11.98
  -1   3 -11   35.00   27.71
  -1   3 -12   50.68   14.89
  -1   3 -12   56.01   15.94
  -1   3 -12   57.21   35.32
  -1   3 -13   25.50   10.95
  -1   3 -13   28.23   10.28
  -1   3 -13   22.68   29.45
  -1   3 -14   41.84   12.74
  -1   3 -14   36.69    9.19
  -1   3 -15   18.84    7.24
  -1   3 -15   19.69    5.91
  -1   3 -16   12.02    5.48
   1   4 -16    2.77    3.94
   1   4 -15   10.41    5.97
   1   4 -15    6.49    5.32
   1   4 -14   77.21   15.62
   1   4 -14   75.24   13.54
   1   4 -13   15.57   13.65
   1   4 -13   13.55   10.61
   1   4 -12    3.64    5.02
   1   4 -12   -2.47   10.51
   1   4 -12    3.61    5.04
   1  -4 -11  486.51   43.49
   1   4 -11  461.68   45.48
   1   4 -11  431.41   44.60
   1   4 -11  474.86   46.12
   1  -4 -10   17.71    8.16
   1   4 -10   16.09    7.44
   1   4 -10   17.18    8.94
   1   4 -10   26.83   18.11
  -1  -4   9   96.03   16.80
   1  -4  -9  121.77   18.25
   1   4  -9  103.30   16.83
   1   4  -9   91.31   13.83
   1   4  -9  101.76   17.84
   1   4  -9  102.06   24.68
  -1  -4   8   59.48   12.36
   1  -4  -8   67.94   13.37
   1  -4  -8   57.29   13.64
   1   4  -8   58.54   25.89
   1   4  -8   52.19   11.60
   1   4  -8   58.50   12.95
   1   4  -8   49.55   12.56
   1   4  -8   53.38   24.88
  -1  -4   7  146.44   15.05
   1  -4  -7  152.95   17.99
   1  -4  -7  149.24   15.18
   1   4  -7  156.90   22.95
   1   4  -7  115.95   15.35
   1   4  -7  134.10   17.77
   1   4  -7  109.63   17.18
   1   4  -7  134.37   19.04
  -1  -4   6  285.24   21.04
   1  -4  -6  335.77   26.43
   1  -4  -6  313.93   37.83
   1   4  -6  212.49   19.52
   1   4  -6  233.97   19.40
   1   4  -6  284.28   23.00
   1   4  -6  254.08   22.55
   1   4  -6  262.94   24.50
  -1  -4   5  372.36   21.47
   1  -4  -5  471.01   29.82
   1  -4  -5  394.09   27.54
   1   4  -5  465.76   29.41
   1   4  -5  366.40   25.58
   1   4  -5  338.57   24.62
  -1  -4   4 2172.20   65.32
   1  -4  -4 2417.32   81.70
   1  -4  -4 2362.59   92.71
   1   4  -4 2763.50   91.53
   1   4  -4 2110.51   79.43
  -1  -4   3  767.95   26.86
   1  -4  -3  903.14   39.59
   1  -4  -3  884.13   41.08
   1   4  -3  915.16   47.28
  -1  -4   2  975.42   29.86
   1  -4  -2 1122.61   44.39
   1  -4  -2 1126.79   42.55
   1   4  -2 1259.31   52.27
  -1  -4   1 1318.27   36.75
   1  -4  -1 1462.81   52.12
   1   4  -1 1697.36   62.14
  -1  -4   0   16.65    3.45
   1  -4   0   22.56    6.58
   1   4   0   23.88   22.66
   1  -4   1 1708.38   58.43
  -1  -4  -1 1507.74   43.42
   1   4   1 1983.92   65.73
   1  -4   2  496.84   27.02
  -1  -4  -2  459.09   20.00
   1   4   2  548.79   27.47
   1  -4   3  385.07   24.02
  -1  -4  -3  384.27   20.02
   1   4   3  453.94   28.14
   1  -4   4  262.92   22.35
  -1  -4  -4  220.06   16.34
   1   4   4  219.55   14.59
  -1   4  -4  198.41   18.51
  -1   4  -4  186.90   17.74
   1  -4   5   81.07   12.01
  -1  -4  -5   74.44   10.82
  -1   4  -5   69.54   11.63
  -1   4  -5   64.52   11.63
   1  -4   6  205.55   20.38
  -1  -4  -6  168.52   16.72
  -1   4  -6  203.06   49.26
  -1   4  -6  128.52   14.59
  -1   4  -6  152.03   17.02
  -1   4  -6  140.16   17.03
  -1   4  -6  149.11   17.58
   1  -4   7   56.65   12.07
  -1  -4  -7   41.19    9.37
  -1   4  -7   54.83   38.96
  -1   4  -7   36.35    8.93
  -1   4  -7   35.47    9.56
  -1   4  -7   39.31    9.95
  -1   4  -7   59.97   24.78
   1  -4   8   81.09   21.84
  -1  -4  -8   62.80   11.42
  -1   4  -8   66.88   10.60
  -1   4  -8   59.56   11.76
  -1   4  -8   55.08   12.23
  -1   4  -8   76.42   40.87
   1  -4   9  210.95   75.99
  -1  -4  -9  204.08   20.95
  -1   4  -9  167.41   21.54
  -1   4  -9  164.93   22.90
  -1   4  -9  174.19   31.84
   1  -4  10  134.81   62.97
  -1  -4 -10  139.48   19.70
  -1   4 -10  155.34   23.29
  -1   4 -10  132.53   23.44
  -1   4 -10  140.42   22.81
   1  -4  11   49.68   29.69
  -1  -4 -11   43.64   10.77
  -1   4 -11   59.13   16.08
  -1   4 -11   78.38   51.20
  -1   4 -12    3.69    6.96
  -1   4 -12    2.58    4.53
  -1   4 -12    3.37    7.86
  -1   4 -13   24.39    9.62
  -1   4 -13   29.39    9.41
  -1   4 -13   21.87   17.29
  -1   4 -14    4.07    4.39
  -1   4 -14    5.80    4.83
  -1   4 -15   20.39    6.87
  -1   4 -15   14.71    5.00
   1   5 -15    5.48    3.98
   1   5 -15    2.62    4.44
   1   5 -14    7.06    4.91
   1   5 -14    6.28    7.67
   1   5 -13   11.54    7.18
   1   5 -13   11.32    7.05
   1   5 -12  164.73   30.95
   1   5 -12  172.39   32.84
   1   5 -12  145.28   28.35
   1   5 -11   64.41   15.48
   1   5 -11   63.06   18.38
   1   5 -11   64.02   35.22
   1  -5 -10  177.11   23.47
   1   5 -10  166.66   23.67
   1   5 -10  156.83   26.22
   1   5 -10  144.64   48.23
   1  -5  -9   21.39    8.47
   1   5  -9   11.46   21.14
   1   5  -9   16.34    8.21
   1   5  -9   15.83    7.51
   1   5  -9   12.83    9.87
   1   5  -9   23.21   16.30
   1  -5  -8  229.64   23.27
   1   5  -8  218.42   21.03
   1   5  -8  195.09   20.66
   1   5  -8  208.01   24.69
   1  -5  -7  170.04   19.42
   1   5  -7  143.80   17.92
   1   5  -7  128.10   15.77
   1   5  -7  151.01   20.63
   1   5  -7  145.74   19.66
   1   5  -7  136.35   17.72
   1  -5  -6  448.34   31.76
   1  -5  -6  421.64   25.16
   1   5  -6  439.25   31.19
   1   5  -6  349.12   24.91
   1   5  -6  393.51   31.98
   1   5  -6  368.88   28.95
   1   5  -6  371.45   28.24
   1  -5  -5  150.72   17.73
   1  -5  -5  148.10   16.74
   1   5  -5  167.15   19.97
   1   5  -5  135.31   18.28
   1   5  -5  108.00   14.68
   1   5  -5  119.82   15.55
   1  -5  -4  647.99   35.11
   1   5  -4  624.55   39.19
   1   5  -4  513.54   33.48
   1   5  -4  476.22   29.42
   1   5  -4  435.08   26.67
   1  -5  -3  751.55   37.39
   1   5  -3  749.45   44.95
   1   5  -3  616.39   40.33
   1   5  -3  472.49   28.40
   1  -5  -2   31.87    8.88
   1   5  -2   40.09   12.00
   1   5  -2   33.84    8.64
   1  -5  -1  275.00   22.97
   1   5  -1  336.85   25.85
   1   5  -1  295.41   22.65
  -1   5   1  262.29   20.70
   1  -5   0  794.78   37.49
   1   5   0  893.78   46.07
  -1   5   0  756.68   37.56
   1  -5   1  475.73   29.54
   1   5   1  547.92   33.63
  -1   5  -1  460.13   29.13
   1  -5   2 2874.60   82.65
   1   5   2 3122.40   87.83
  -1   5  -2 2498.03   85.49
  -1   5  -2 2156.63   75.91
   1  -5   3  105.00   13.25
   1   5   3  104.17   12.14
  -1   5  -3   84.48   13.23
  -1   5  -3   70.18   10.25
  -1   5  -3   78.66   11.97
   1  -5   4    6.95    5.43
  -1  -5  -4    5.74    4.21
   1   5   4    5.80    5.20
  -1   5  -4    7.50    6.97
  -1   5  -4    4.93    3.62
  -1   5  -4    6.07    5.23
  -1  -5  -5    0.46    2.08
  -1   5  -5    0.55    4.21
  -1   5  -5   -0.36    6.28
  -1   5  -5   -0.45    3.16
  -1   5  -5    1.90    6.30
   1  -5   6  395.84   28.93
  -1  -5  -6  372.01   24.97
  -1   5  -6  402.70   34.56
  -1   5  -6  264.76   21.57
  -1   5  -6  338.04   28.47
  -1   5  -6  334.94   29.59
   1  -5   7   29.91    8.42
  -1  -5  -7   25.96    7.08
  -1   5  -7   26.96   20.38
  -1   5  -7   15.97    6.10
  -1   5  -7   23.10    9.38
  -1   5  -7   26.79    9.49
  -1   5  -7   30.67   13.87
   1  -5   8  459.01   39.49
  -1   5  -8  368.48   34.42
  -1   5  -8  402.01   37.65
  -1   5  -8  413.39   39.68
   1  -5   9  808.92   64.53
  -1   5  -9  727.08   54.62
  -1   5  -9  760.13   61.07
  -1   5  -9  682.33   61.98
   1  -5  10    1.02    1.81
  -1   5 -10    2.32    5.84
  -1   5 -10    3.48    5.65
  -1   5 -10    4.52    5.59
  -1   5 -11  103.28   17.11
  -1   5 -11  110.35   19.61
  -1   5 -11  131.57   53.61
  -1   5 -12   45.61   12.78
  -1   5 -12   48.66   13.85
  -1   5 -12   50.00   50.52
  -1   5 -13    0.96    3.81
  -1   5 -13    1.77    4.30
  -1   5 -13   -0.25    3.34
  -1   5 -14    9.49    5.54
  -1   5 -14    7.08    4.26
   1   6 -14    0.17    0.85
   1   6 -14    6.01    7.90
   1   6 -13    1.06    1.70
   1   6 -13   28.34   20.85
   1   6 -12    1.07    1.96
   1   6 -11    0.31    1.73
   1   6 -11   14.13   12.05
   1   6 -11   10.70   11.48
   1   6 -10    1.40    2.92
   1   6 -10    1.95    3.03
   1   6 -10    4.06    8.78
   1   6 -10    3.22    2.76
   1  -6  -9   30.10    8.77
   1   6  -9   25.73    8.27
   1   6  -9   28.96   11.23
   1   6  -9   25.06    9.58
   1   6  -9   27.26   14.18
   1  -6  -8  168.61   22.16
   1   6  -8  170.06   25.66
   1   6  -8  137.22   18.75
   1   6  -8  184.97   25.42
   1   6  -8  153.37   24.05
   1   6  -8  153.72   30.70
   1  -6  -7   55.86   11.95
   1   6  -7   53.31   18.87
   1   6  -7   51.38   16.57
   1   6  -7   55.88   14.04
   1   6  -7   48.56   32.30
   1  -6  -6   70.23   12.29
   1   6  -6   76.69   41.67
   1   6  -6   78.03   17.79
   1   6  -6   70.24   14.35
   1   6  -6   58.18   45.93
   1  -6  -5  455.31   29.54
   1   6  -5  429.51   33.21
   1   6  -5  392.62   29.06
   1   6  -5  373.98   26.34
   1  -6  -4  141.70   16.86
   1   6  -4  146.06   20.72
   1   6  -4  133.26   19.63
  -1   6   4  133.57   15.47
   1   6  -4  116.02   15.61
   1   6  -4  107.50   14.18
   1  -6  -3   59.79   11.02
   1   6  -3   67.90   14.18
   1   6  -3   68.78   14.33
  -1   6   3   59.70   10.50
   1   6  -3   50.40    9.63
   1  -6  -2  596.07   34.29
   1   6  -2  639.70   41.25
   1   6  -2  565.66   36.40
  -1   6   2  563.19   34.53
   1   6  -2  469.74   28.41
   1  -6  -1  372.10   25.82
   1   6  -1  376.55   29.98
   1   6  -1  349.03   28.19
  -1   6   1  347.87   26.79
   1  -6   0  112.62   14.20
   1   6   0  121.53   16.85
   1   6   0  113.33   16.29
  -1   6   0  108.14   16.00
  -1   6   0   79.50   11.49
   1  -6   1 1425.20   54.04
   1   6   1 1595.53   63.80
   1   6   1 1358.38   54.64
  -1   6  -1 1381.98   58.85
  -1   6  -1 1111.81   49.59
   1  -6   2  177.97   17.93
   1   6   2  190.02   22.76
   1   6   2  164.75   17.48
  -1   6  -2  143.03   19.93
  -1   6  -2  146.57   16.94
   1  -6   3   18.81    6.50
   1   6   3   14.81   12.19
  -1   6  -3   22.45   18.34
  -1   6  -3   15.74    7.42
  -1   6  -3   10.27    4.40
  -1   6  -3   13.85    7.03
   1  -6   4   19.54    6.42
  -1   6  -4   27.81   22.23
  -1   6  -4   20.59    8.67
  -1   6  -4   15.89    5.71
  -1   6  -4   21.29    8.71
   1  -6   5  467.91   29.18
  -1   6  -5  504.13   34.51
  -1   6  -5  430.57   32.85
  -1   6  -5  400.81   29.77
   1  -6   6  289.59   23.87
  -1   6  -6  312.55   28.38
  -1   6  -6  303.06   28.13
  -1   6  -6  254.81   25.71
  -1   6  -6  295.38   66.67
   1  -6   7   14.05    5.82
  -1   6  -7   17.33   13.12
  -1   6  -7   25.17   15.06
  -1   6  -7   14.30    7.14
  -1   6  -7   16.56   11.76
  -1   6  -8   28.53   36.80
  -1   6  -8   64.08   16.06
  -1   6  -8   50.28   13.54
  -1   6  -8   61.90   21.35
  -1   6  -9    4.34    3.73
  -1   6  -9   80.61   18.21
  -1   6  -9   81.80   18.08
  -1   6  -9   83.90   40.33
  -1   6 -10    0.29    2.52
  -1   6 -11    0.93    3.11
  -1   6 -11   23.80   16.84
  -1   6 -11   27.93   14.31
  -1   6 -12    1.44    2.27
  -1   6 -12   26.86    9.24
  -1   6 -12   16.33   24.21
  -1   6 -13    0.54    1.34
  -1   6 -13    5.98    4.89
  -1   6 -14   18.79    6.11
   1   7 -13    5.59   18.27
   1   7 -12   60.00   24.91
   1   7 -11   33.93   20.49
   1   7 -11   27.26    8.78
   1   7 -10    5.28    4.86
   1   7 -10    7.01    7.26
   1   7 -10    3.42    7.72
   1   7  -9  149.70   20.95
   1   7  -9  133.01   20.97
   1   7  -9  118.14   31.25
   1   7  -8  147.51   27.71
   1   7  -8  143.65   31.26
   1   7  -7   89.64   16.16
   1   7  -7  127.30   22.40
   1   7  -7  116.11   19.44
   1   7  -7   96.52   15.98
   1   7  -6  167.17   51.70
   1   7  -6  208.63   29.26
   1   7  -6  193.84   25.35
   1   7  -6  179.71   22.73
   1   7  -5   10.39   12.95
   1   7  -5   13.21    9.51
   1   7  -5   11.05    9.81
   1   7  -5    7.34    5.84
   1  -7  -4  149.02   18.37
   1   7  -4  190.02   44.45
  -1   7   4  174.48   20.47
   1   7  -4  178.35   28.54
  -1   7   4  174.74   20.36
   1   7  -4  163.21   20.44
   1  -7  -3   87.73   12.61
   1   7  -3  103.90   18.23
  -1   7   3   86.34   13.46
   1   7  -3   99.57   17.71
  -1   7   3   85.19   13.75
   1   7  -3   74.05   45.86
   1  -7  -2    9.41    4.56
   1   7  -2   14.00   10.62
  -1   7   2   13.94   10.89
   1   7  -2   12.15    6.76
  -1   7   2   11.29    6.27
   1  -7  -1  322.32   23.35
   1   7  -1  343.73   30.58
  -1   7   1  351.74   29.18
   1   7  -1  326.04   29.96
  -1   7   1  321.09   27.97
   1   7   0  113.60   18.54
  -1   7   0  101.54   16.45
   1   7   0  102.11   16.75
  -1   7   0   94.11   16.34
  -1   7   0   77.31   12.00
  -1   7  -1  109.28   54.04
   1   7   1   92.33   15.10
  -1   7  -1   92.98   15.98
  -1   7  -1   84.74   13.07
  -1   7  -2  109.37   17.60
   1   7   2  127.00   16.91
  -1   7  -2  117.20   19.19
  -1   7  -2   93.11   14.07
  -1   7  -3   64.77   36.72
  -1   7  -3   65.32   34.68
  -1   7  -3   45.35   11.25
  -1   7  -4    2.33    4.89
  -1   7  -4    5.94    7.46
  -1   7  -4    1.11    1.79
  -1   7  -4    1.71    3.30
  -1   7  -5  165.87   22.88
  -1   7  -5  174.76   25.54
  -1   7  -5  145.05   19.86
  -1   7  -5  144.99   27.39
  -1   7  -6   15.91   14.16
  -1   7  -6   31.66   13.21
  -1   7  -6   21.43    7.75
  -1   7  -6   27.84   12.95
  -1   7  -7   16.03   22.38
  -1   7  -7   28.73   12.97
  -1   7  -7   22.96    8.37
  -1   7  -7   32.11   29.83
  -1   7  -8    0.73    3.47
  -1   7  -8    1.73    3.52
  -1   7  -8    0.27    3.92
  -1   7  -9  123.89   24.57
  -1   7  -9  122.51   25.02
  -1   7  -9  134.57   27.62
  -1   7 -10   50.89   12.32
  -1   7 -10   52.25   51.76
  -1   7 -11    9.45    5.11
  -1   7 -11   11.60   20.42
  -1   7 -12    1.93    3.37
  -1   7 -12    2.58    6.33
  -1   7 -13    5.95    4.04
   1   8 -12    4.48   13.97
   1   8 -11    5.12   13.04
   1   8 -10   14.78    5.54
   1   8 -10   11.73   19.05
   1   8  -9   53.12   11.68
   1   8  -9   36.38   23.02
   1   8  -9    0.28    0.85
   1   8  -8  123.80   25.04
   1   8  -8   95.72   19.68
   1   8  -8    0.38    2.36
   1   8  -7    0.72    3.25
   1   8  -6  646.10  374.30
   1   8  -6  516.75   41.49
   1   8  -5    3.12    6.23
   1   8  -5    7.09   10.59
   1   8  -5    4.47    7.29
   1   8  -4  149.94   34.99
   1   8  -4  210.16   34.93
   1   8  -4  165.49   27.62
   1   8  -3    1.85    5.02
  -1   8   3    1.84    5.97
   1   8  -3    6.41    6.88
  -1   8   3    4.28    4.47
   1   8  -2   22.40   25.21
  -1   8   2   16.84   21.19
   1   8  -2   37.33   13.44
  -1   8   2   32.92   10.94
   1   8  -1  219.36   26.62
  -1   8   1  245.22   29.24
  -1   8   1  282.25   31.97
   1   8   0  768.90   61.46
  -1   8   0  961.60   69.53
   1   8   0 1108.73   76.41
  -1   8   0 1092.10   76.86
   1   8   1  283.18   30.69
  -1   8  -1  368.04   36.59
   1   8   1  386.99   37.29
  -1   8  -1  398.99   39.78
  -1   8  -2  888.14   65.04
   1   8   2  956.34   65.56
  -1   8  -2  987.77   72.84
  -1   8  -2  789.43   56.47
  -1   8  -3  309.28   32.50
  -1   8  -3  385.83   42.28
  -1   8  -3  352.19   33.87
  -1   8  -4  175.08   26.76
  -1   8  -4  219.82   91.46
  -1   8  -4  159.89   23.94
  -1   8  -5   82.18   45.49
  -1   8  -5   46.82   26.70
  -1   8  -6    0.68    1.61
  -1   8  -6   91.15   37.18
  -1   8  -7   40.40   12.39
  -1   8  -7    0.48    1.37
  -1   8  -7   31.71   27.02
  -1   8  -8   40.19   10.56
  -1   8  -8    0.67    1.32
  -1   8  -8   32.07   36.30
  -1   8  -9    3.42    3.28
  -1   8  -9    0.58    1.38
  -1   8  -9    3.27    6.96
  -1   8 -10    1.00    1.99
  -1   8 -10   -0.15    3.13
  -1   8 -11    5.30    3.93
   1   9 -10    0.32    1.04
   1   9  -9   42.40    9.21
   1   9  -9    0.17    0.76
   1   9  -8   55.12   11.79
   1   9  -8    0.34    1.13
   1   9  -7   14.50    7.66
   1   9  -7    0.34    1.88
   1   9  -6   10.07    8.42
   1   9  -5    3.00    5.33
   1   9  -4    2.51    8.57
   1   9  -3    9.07    8.54
  -1   9   3    0.67    2.37
   1   9  -2    5.68    6.11
  -1   9   2    4.38    4.97
   1   9  -1  124.55   21.37
  -1   9   1  134.93   23.58
   1   9   0  303.87   29.93
  -1   9   0  273.12   39.70
   1   9   1  321.20   27.81
  -1   9  -1  354.78   34.52
   1   9   2    0.99    2.62
  -1   9  -3  104.75   25.79
  -1   9  -4    6.07    6.77
  -1   9  -4    0.66    2.46
  -1   9  -5   77.68   15.81
  -1   9  -5    0.57    1.97
  -1   9  -6   64.14   13.00
  -1   9  -6    0.22    1.09
  -1   9  -7    5.60    4.36
  -1   9  -7    0.40    1.25
  -1   9  -8   30.53    8.05
  -1   9  -8    0.75    1.57
  -1   9  -9    2.86    2.44
  -1   9  -9    0.50    2.51
   1  10  -7    4.76    5.12
   1  10  -6   86.27   15.64
   1  10  -5    6.87    7.17
   1  10  -4   15.38    7.35
   1  10  -3   23.09    9.87
   1  10  -2   47.78   12.66
  -1  10   2    0.30    1.51
   1  10  -1   12.22    7.33
  -1  10   1    0.72    2.06
   1  10   0    0.57    1.80
  -1  10   0    5.88    5.43
   1  10   1    0.50    1.71
  -1  10  -1   66.34   13.74
  -1  10  -2    6.55    7.47
  -1  10  -3   98.85   16.49
  -1  10  -4   -0.27    4.00
  -1  10  -5   10.26   10.88
  -1  10  -6    0.26    2.62
  -1  10  -7    6.36    4.34
   1  11  -4    0.10    2.76
   1  11  -3   20.79    6.34
   1  11  -2    2.71    3.64
   1  11  -1    3.01    3.31
  -1  11  -1    1.43    3.03
  -1  11  -2   29.14    7.15
  -1  11  -3    5.42    5.22
   2   0 -15    0.28    2.76
   2   0 -14    3.96    4.65
   2   0 -13    3.62    7.30
   2   0 -13    1.19   10.12
   2   0 -12  170.52   24.80
   2   0 -12  149.54   24.73
   2   0 -11   28.47   10.77
   2   0 -11   16.50    7.77
   2   0 -10  177.03   20.87
   2   0 -10  119.48   18.76
   2   0  -9   39.63   10.74
   2   0  -9   29.89    9.43
   2   0  -8   93.06   14.40
   2   0  -8   67.81   11.80
   2   0  -7 2536.55   87.55
   2   0  -1 4014.49  100.76
   2   0   0   59.52    6.45
   2   0   0   61.73    7.77
   2   0   1 2213.82   62.30
   2   0   1 2285.49   62.99
   2   0   2  284.23   16.61
   2   0   3 7127.75  175.50
   2   0   4 4651.39  123.39
   2   0   5  997.07   42.95
   2   0   6  413.18   27.48
   2   0   7  205.58   32.34
   2   0   7  158.03   17.69
   2   0   8  374.34   29.94
   2   0   8  324.02   26.79
   2   0   9  116.50   37.89
   2   0   9  104.46   27.55
   2   0  10  366.33   56.91
   2   0  10  342.47   33.28
   2   0  11  202.16   28.88
  -2   0 -11  176.22   26.47
   2   0  12    4.34    9.24
  -2   0 -12    5.97    7.61
  -2   0 -12    3.16    6.56
  -2   0 -13   53.39   14.55
  -2   0 -14    2.08    5.43
  -2   0 -15   41.72    9.66
   2   1 -17   12.23    4.20
   2   1 -16    8.41    5.93
   2  -1 -15    4.50    3.66
   2   1 -15    3.96    4.71
   2  -1 -14   36.76   10.69
   2   1 -14   36.20   12.62
   2  -1 -13    5.63    7.74
   2   1 -13    5.98    5.54
   2  -1 -13   10.28   13.38
   2   1 -13    8.27   10.47
   2  -1 -12   44.49   12.83
   2   1 -12   38.89   11.46
   2  -1 -12   37.41   12.76
   2   1 -12   43.07   14.75
   2  -1 -11   27.73   10.09
   2   1 -11   17.06    7.58
   2  -1 -11   21.89    9.08
   2   1 -11   13.72    7.99
   2   1 -11   15.61    7.20
   2  -1 -10   48.49   13.06
   2   1 -10   63.75   13.34
   2  -1 -10   32.06   10.23
   2   1 -10   33.59   11.68
   2   1 -10   28.20    9.03
  -2  -1   9  221.60   22.20
   2  -1  -9  244.33   24.99
   2  -1  -9  172.13   19.83
   2   1  -9  189.52   21.98
   2   1  -9  157.09   17.96
  -2  -1   8   80.78   20.05
   2  -1  -8   80.63   14.40
   2  -1  -8   53.50   10.15
   2   1  -8   55.72   11.08
   2   1  -8   55.48   10.64
  -2  -1   7  277.06   24.39
   2  -1  -7  362.52   26.80
   2   1  -7  235.18   20.93
  -2  -1   6  121.34   12.80
   2  -1  -6  165.01   16.49
   2   1  -5  238.60   16.31
   2   1  -4  373.79   18.54
   2   1  -3 3131.22   81.83
   2   1  -2 2433.07   63.14
   2  -1  -2 2623.94   81.60
   2   1  -1  317.99   12.14
   2  -1  -1  328.60   19.21
   2   1   0 2751.38   69.50
   2   1   0 3002.13   76.59
   2   1   1 6744.14  159.80
   2   1   2 1657.10   49.24
   2  -1   2 1891.55   59.88
   2   1   3 3498.73   95.25
   2  -1   3 3646.61  103.07
   2   1   4   60.30   10.19
   2  -1   4   47.12    9.33
   2   1   5 2983.04   93.75
   2  -1   5 2868.57   91.09
   2   1   6  157.63   17.15
   2  -1   6  173.93   18.51
   2  -1   6  139.00   17.29
   2   1   7   57.49   36.57
   2  -1   7   53.28   14.29
   2  -1   7   36.60   13.43
   2   1   7   47.79   29.48
  -2   1  -7   31.97   18.67
   2   1   8  316.40   27.34
   2  -1   8  301.20   33.72
   2  -1   8  277.38   42.45
   2   1   8  324.26   26.85
  -2   1  -8  221.72   29.23
   2   1   9   75.15   44.59
   2  -1   9   78.29   51.59
   2  -1   9   55.38   17.34
   2   1   9   74.08   49.18
  -2   1  -9   42.47   22.39
   2   1  10  395.49   38.85
   2  -1  10  384.51   37.95
   2  -1  10  383.28   41.42
   2   1  10  368.83   37.38
  -2   1 -10  307.41   31.53
   2   1  11  416.83   39.45
   2  -1  11  475.93   69.18
  -2  -1 -11  396.76   40.28
  -2   1 -11  385.87   42.56
  -2   1 -11  313.88   30.89
   2   1  12  137.65   33.58
   2  -1  12  156.16   84.57
  -2  -1 -12  170.08   29.34
  -2   1 -12  175.07   32.85
  -2   1 -12  188.60   32.28
  -2  -1 -13    8.63    7.72
  -2   1 -13    5.41    6.39
  -2   1 -13    6.03    5.81
  -2  -1 -14   62.70   11.67
  -2   1 -14   64.46   13.45
  -2   1 -14   51.51    9.74
  -2  -1 -15    2.89    2.42
  -2   1 -15    4.73    5.07
  -2   1 -16   10.65    4.40
   2   2 -16   12.90    5.75
   2   2 -15   43.47   11.18
   2   2 -14    1.58    5.02
   2   2 -13  151.83   25.84
   2   2 -13  156.28   40.48
   2  -2 -12  111.69   19.41
   2   2 -12   97.15   16.86
   2  -2 -12   88.81   15.62
   2  -2 -12   83.06   15.64
   2   2 -12   92.56   19.16
   2   2 -12   83.47   17.88
   2  -2 -11   69.97   16.01
   2   2 -11   14.70    6.76
   2  -2 -11   14.75    7.99
   2   2 -11   12.44   10.32
   2   2 -11   10.15    7.04
  -2  -2  10   19.90   15.84
   2  -2 -10   34.82   11.28
   2  -2 -10   21.20    7.91
   2   2 -10   13.64    9.22
   2   2 -10   23.79   10.29
  -2  -2   9   40.78   27.33
   2  -2  -9   47.07   12.12
   2  -2  -9   25.13    8.19
   2   2  -9   44.20   12.32
   2   2  -9   38.55   10.91
  -2  -2   8  552.27   31.09
   2  -2  -8  651.81   40.52
   2  -2  -8  382.38   26.33
   2   2  -8  487.99   32.54
   2   2  -8  447.94   29.97
   2   2  -8  505.28   38.10
  -2  -2   7  464.25   26.07
   2  -2  -7  623.25   37.18
   2   2  -7  449.50   29.59
   2   2  -7  415.88   27.98
   2   2  -7  435.86   32.85
  -2  -2   6  542.37   30.03
   2  -2  -6  718.88   37.91
  -2  -2   5  113.01   14.94
   2  -2  -5  145.39   15.99
   2  -2  -5  135.77   19.64
   2  -2  -4  464.50   27.11
   2   2  -4  478.15   19.71
   2  -2  -4  433.05   28.92
   2  -2  -3 2057.56   66.89
   2   2  -3 1900.36   50.02
   2  -2  -3 1962.62   68.77
   2  -2  -2   47.17    8.51
   2  -2  -2   44.39    8.62
   2  -2  -1  443.33   24.18
   2  -2   0  687.65   29.97
   2  -2   0  721.05   32.60
   2   2   0  625.79   19.26
   2   2   1 1448.63   38.99
   2  -2   1 1804.00   58.54
   2   2   2  664.90   24.86
   2  -2   2  792.15   35.26
   2   2   3    0.89    3.25
   2  -2   3    1.65    5.39
   2   2   4 1595.76   52.80
   2  -2   4 1804.17   64.37
   2   2   5 3469.50  126.52
   2  -2   5 3642.18  112.62
   2   2   6   34.95   26.47
   2  -2   6   36.62   10.56
   2  -2   6   35.17   21.70
  -2   2  -6   27.58    8.02
   2   2   7   75.70   16.92
   2  -2   7   74.30   13.62
   2  -2   7   65.91   27.99
   2   2   7   63.71   10.14
  -2   2  -7   54.08   10.68
   2   2   8  342.35   26.64
   2  -2   8  345.16   29.71
   2  -2   8  283.15   27.51
   2   2   8  315.17   25.26
  -2   2  -8  244.17   30.87
   2   2   9  383.34   29.15
   2  -2   9  512.47   35.97
   2  -2   9  414.91   34.26
   2   2   9  401.33   31.92
  -2   2  -9  344.14   32.96
   2   2  10  370.56   35.00
   2  -2  10  449.99   50.73
   2  -2  10  375.86   42.70
   2   2  10  351.73   43.19
  -2   2 -10  353.66   36.42
   2   2  11   54.02   63.91
   2  -2  11   79.70   16.20
  -2  -2 -11   65.82   15.70
  -2   2 -11   68.44   17.32
  -2   2 -11   64.93   16.11
  -2   2 -11   62.09   42.13
  -2  -2 -12  166.95   19.54
  -2   2 -12  139.21   22.38
  -2   2 -12  167.66   23.99
  -2   2 -12  152.14   18.25
  -2  -2 -13    3.31    3.54
  -2   2 -13    2.78    5.12
  -2   2 -13    4.85    5.04
  -2   2 -13    1.25    2.37
  -2   2 -14   69.61   14.25
  -2   2 -14   55.55   10.66
  -2   2 -15   16.74    6.26
  -2   2 -16    1.54    2.01
   2   3 -16    3.68    3.84
   2   3 -15   18.01    8.91
   2   3 -14   75.56   15.37
   2   3 -14   61.70   27.55
   2   3 -13   41.57   15.02
   2   3 -13   30.45   18.95
   2  -3 -12  236.71   32.85
   2   3 -12  283.23   40.57
   2   3 -12  242.38   34.89
   2  -3 -11   84.63   16.94
   2  -3 -11   82.92   14.96
   2   3 -11  102.81   19.82
   2   3 -11   88.66   18.51
   2  -3 -10  213.37   25.12
   2  -3 -10  207.11   21.12
   2   3 -10  186.62   24.27
   2   3 -10  172.61   22.84
   2   3 -10  195.18   23.51
  -2  -3   9   91.06   20.20
   2  -3  -9  134.30   20.19
   2  -3  -9  116.35   24.93
   2   3  -9  118.13   19.46
   2   3  -9   95.52   17.32
  -2  -3   8  216.59   17.53
   2  -3  -8  270.49   25.38
   2  -3  -8  261.43   27.06
   2   3  -8  196.93   21.36
   2   3  -8  227.99   21.65
   2   3  -8  195.91   22.62
   2   3  -8  221.63   22.70
  -2  -3   7   11.56   12.86
   2  -3  -7   24.81    8.11
   2  -3  -7   27.79   18.64
   2   3  -7   14.44    5.80
   2   3  -7   15.36    6.72
   2   3  -7   14.70    7.67
  -2  -3   6  114.47   10.80
   2  -3  -6  150.68   17.87
   2  -3  -6  161.42   19.93
   2   3  -6  121.44   14.42
   2   3  -6  122.33   14.76
   2   3  -6  109.44   14.80
   2   3  -6  119.50   14.31
  -2  -3   5  228.77   13.74
   2  -3  -5  322.73   24.17
   2  -3  -5  306.40   27.38
   2   3  -5  327.65   24.83
   2   3  -5  258.42   20.57
   2  -3  -4  653.55   34.08
   2  -3  -4  644.28   33.42
   2   3  -4  652.49   34.02
   2  -3  -3  279.45   21.12
   2  -3  -3  287.68   32.36
   2   3  -3  277.59   20.66
   2  -3  -2  919.97   39.86
   2  -3  -2  944.97   41.76
   2   3  -2 1038.38   43.03
   2  -3  -1  682.06   32.55
   2  -3  -1  696.82   45.13
   2   3  -1  762.91   34.89
   2  -3   0  845.82   37.13
   2   3   0  944.75   38.30
   2  -3   1 1874.59   63.67
   2   3   1 2054.00   99.23
   2  -3   2   37.35    8.57
  -2  -3  -2   28.72    4.11
   2   3   3 1590.80   50.85
   2  -3   3 1829.79   65.28
   2   3   4 2892.78   86.64
   2  -3   4 3611.77  112.53
  -2   3  -4 2324.35   80.81
   2   3   5  538.90   32.41
   2  -3   5  637.30   36.86
   2  -3   5  463.75   29.36
  -2   3  -5  414.12   27.71
   2   3   6  147.78   18.11
   2  -3   6  180.72   20.54
   2  -3   6  126.17   16.69
  -2   3  -6  117.13   17.18
   2   3   7  317.44   23.12
   2  -3   7  378.71   31.14
  -2   3  -7  338.10   22.38
   2  -3   7  291.90   34.45
  -2   3  -7  269.24   25.94
   2   3   8  223.15   19.91
   2  -3   8  283.26   26.27
   2  -3   8  224.62   41.11
  -2   3  -8  205.18   37.09
   2   3   9  163.97   17.95
   2  -3   9  232.70   26.40
   2  -3   9  184.91   24.69
  -2   3  -9  182.77   83.93
   2   3  10  141.11   29.11
  -2   3 -10  175.05   26.33
  -2   3 -10  170.91   26.95
  -2   3 -10  169.65   35.08
   2  -3  11  377.90   44.66
  -2  -3 -11  336.17   39.34
  -2   3 -11  348.52   45.45
  -2   3 -11  343.17   56.09
  -2   3 -12  301.06   31.04
  -2   3 -12  305.33   30.15
  -2   3 -12  300.64   29.00
  -2   3 -13    3.78    5.76
  -2   3 -13    3.95    4.14
  -2   3 -13    2.29    5.16
  -2   3 -14    6.15    6.54
  -2   3 -14    1.85    3.52
  -2   3 -15    9.84    5.74
   2   4 -16    0.77    2.53
   2   4 -15   13.24    6.91
   2   4 -15    4.31    5.81
   2   4 -14   13.81    7.93
   2   4 -14   12.16   13.69
   2   4 -13   18.27   13.63
   2   4 -13   22.35   20.47
   2   4 -12  156.64   22.96
   2   4 -12  165.82   22.93
   2  -4 -11  146.03   21.81
   2   4 -11  154.93   24.34
   2   4 -11  149.60   25.62
   2  -4 -10  119.20   19.70
   2   4 -10  107.59   20.62
   2   4 -10  112.66   19.49
   2  -4  -9  335.65   30.08
   2  -4  -9  287.38   24.51
   2   4  -9  269.71   27.07
   2   4  -9  261.48   23.80
   2   4  -9  249.42   29.16
   2   4  -9  216.73   23.48
   2  -4  -8   35.95   11.47
   2  -4  -8   36.28   26.87
   2   4  -8   34.18    9.87
   2   4  -8   39.71   10.99
   2   4  -8   32.38   10.78
   2   4  -8   34.35   23.62
   2  -4  -7   17.72    8.80
   2  -4  -7   19.14   14.20
   2   4  -7   17.26    7.21
   2   4  -7   20.60    8.35
   2   4  -7   16.17    7.23
   2   4  -7   18.11    9.78
   2  -4  -6   11.27    6.30
   2  -4  -6   13.45   11.67
   2   4  -6   14.89   11.24
   2   4  -6    8.74    4.87
   2   4  -6   14.93    6.77
   2   4  -6   10.80    5.63
   2   4  -6   11.52    9.53
   2  -4  -5  261.64   23.86
   2  -4  -5  260.68   42.88
   2   4  -5  249.72   28.30
   2   4  -5  180.26   16.69
   2   4  -5  208.60   20.98
   2   4  -5  200.56   19.91
   2   4  -5  179.68   17.65
   2  -4  -4  104.17   14.64
   2  -4  -4  125.14   40.35
   2   4  -4   95.88   14.31
   2   4  -4   78.57   12.88
   2   4  -4   70.73   11.19
   2  -4  -3 1104.07   49.54
   2  -4  -3 1114.98   47.76
   2   4  -3 1037.04   47.80
   2  -4  -2  773.61   38.55
   2  -4  -2  763.93   38.69
   2   4  -2  839.00   44.23
   2  -4  -1  621.41   35.71
   2   4  -1  663.90   34.57
   2  -4   0 1604.56   61.79
   2   4   0 1808.89   63.93
   2  -4   1   78.64   11.87
   2   4   1  110.63   12.56
   2  -4   2 1341.98   54.97
   2   4   2 1360.43   63.45
  -2   4  -2 1047.39   46.00
   2  -4   3 1466.51   58.30
  -2   4  -3 1104.26   47.63
  -2   4  -3 1060.13   47.24
   2  -4   4  283.03   24.30
   2  -4   4  153.69   30.38
  -2   4  -4  201.66   19.48
  -2   4  -4  194.44   20.14
   2  -4   5  110.24   15.94
   2  -4   5   66.08   40.36
  -2   4  -5   81.21   13.80
  -2   4  -5   76.74   14.69
   2  -4   6  282.91   26.11
   2  -4   6  214.60   21.12
  -2   4  -6  223.74   21.43
  -2   4  -6  204.78   23.28
   2  -4   7   99.50   16.18
  -2   4  -7   85.27   13.97
   2  -4   7   77.31   49.83
  -2   4  -7   73.81   13.22
  -2   4  -7   81.72   20.30
   2  -4   8  275.89   26.41
  -2   4  -8  221.89   25.98
   2  -4   9  325.41   41.86
  -2   4  -9  279.41   33.10
  -2   4  -9  264.73   41.72
   2  -4  10  250.71   28.36
  -2   4 -10  217.09   27.61
  -2   4 -10  211.57   31.98
  -2   4 -10  234.29   29.28
  -2   4 -11  189.60   24.80
  -2   4 -11  195.66   25.25
  -2   4 -11  192.20   27.36
  -2   4 -12   24.57   17.68
  -2   4 -12   21.19   15.43
  -2   4 -12   23.46   24.33
  -2   4 -13   13.02    7.78
  -2   4 -13   13.03    6.77
  -2   4 -13    4.51   10.83
  -2   4 -14    2.88    5.05
  -2   4 -14    0.77    2.10
  -2   4 -15    2.11    3.68
   2   5 -15    1.02    2.62
   2   5 -15    0.11    1.18
   2   5 -14    4.06    4.16
   2   5 -14    6.09   12.80
   2   5 -13   16.15    7.54
   2   5 -13   18.22   11.26
   2   5 -12  120.71   24.55
   2   5 -12  131.30   76.02
   2   5 -11   36.63   10.99
   2   5 -11   31.85   10.67
   2  -5 -10   99.17   16.98
   2   5 -10   99.05   17.39
   2   5 -10  107.95   19.93
   2   5 -10   94.32   19.26
   2   5 -10   91.11   47.39
   2  -5  -9   66.68   14.92
   2   5  -9   59.73   14.20
   2   5  -9   69.63   16.43
   2   5  -9   53.69   15.03
   2   5  -9   58.14   37.70
   2  -5  -8   96.73   17.05
   2  -5  -8   75.14   13.23
   2   5  -8   81.15   14.55
   2   5  -8   96.60   18.28
   2   5  -8   80.50   16.57
   2   5  -8   80.78   15.31
   2  -5  -7   39.76   10.07
   2  -5  -7   28.01   20.53
   2   5  -7   31.80   35.35
   2   5  -7   31.50    8.55
   2   5  -7   33.18   10.52
   2   5  -7   34.76   10.53
   2   5  -7   28.32   25.23
   2  -5  -6   35.68   10.46
   2  -5  -6   33.38   21.14
   2   5  -6   30.99   26.94
   2   5  -6   20.67    6.48
   2   5  -6   29.38   10.46
   2   5  -6   25.73    9.54
   2   5  -6   19.34   19.45
   2  -5  -5  115.02   16.70
   2  -5  -5  118.64   21.19
   2   5  -5  107.19   17.38
   2   5  -5   70.90   10.69
   2   5  -5   92.66   15.01
  -2   5   5   86.59   12.12
   2   5  -5   83.95   14.08
   2   5  -5   72.17   11.44
   2  -5  -4   89.44   13.98
   2  -5  -4   86.49   14.80
   2   5  -4   90.38   14.91
   2   5  -4   76.95   14.45
  -2   5   4   70.67   10.97
   2  -5  -3  308.19   24.85
   2   5  -3  315.10   27.04
   2   5  -3  294.09   24.68
  -2   5   3  250.64   21.40
   2   5  -3  251.02   29.16
   2  -5  -2  611.81   34.85
   2   5  -2  645.28   37.71
   2   5  -2  595.61   35.28
  -2   5   2  588.22   33.32
   2   5  -2  525.87   30.03
   2  -5  -1  380.25   27.35
   2   5  -1  396.82   29.73
  -2   5   1  345.00   25.68
   2   5  -1  299.76   22.53
   2  -5   0  782.71   40.35
   2   5   0  841.29   42.14
   2   5   0  735.19   37.55
  -2   5   0  669.45   37.45
   2  -5   1  682.97   36.82
   2   5   1  447.75   27.45
   2   5   1  622.39   33.17
  -2   5  -1  550.27   33.77
   2  -5   2   76.92   12.50
   2   5   2   82.89   11.98
   2   5   2   62.63    9.80
  -2   5  -2   63.62   12.37
  -2   5  -2   47.17    9.91
   2  -5   3  134.95   17.05
  -2   5  -3  116.34   16.43
  -2   5  -3  107.45   15.35
   2  -5   4  298.26   25.94
  -2   5  -4  240.08   24.44
  -2   5  -4  227.47   23.38
   2  -5   5  937.13   44.18
  -2   5  -5  791.90   41.86
  -2   5  -5  695.80   38.06
  -2   5  -5  736.50   40.82
   2  -5   6   27.17    8.79
  -2   5  -6   18.02   16.69
  -2   5  -6   15.34    5.84
  -2   5  -6   21.46    9.09
  -2   5  -6   19.06    7.94
  -2   5  -6   13.84    9.35
   2  -5   7   15.50    7.14
  -2   5  -7   11.97   14.25
  -2   5  -7   10.17    5.44
  -2   5  -7   14.64    7.63
  -2   5  -7   13.80    7.89
  -2   5  -7   17.90   15.07
   2  -5   8  140.09   20.14
  -2   5  -8  103.03   16.81
  -2   5  -8  122.69   20.61
  -2   5  -8  126.34   31.54
   2  -5   9  156.84   21.17
  -2   5  -9  177.39   23.40
  -2   5  -9  198.47   27.38
  -2   5  -9  183.07   30.56
  -2   5 -10  286.59   27.50
  -2   5 -10  297.17   30.36
  -2   5 -10  324.65   35.74
  -2   5 -11   81.68   18.80
  -2   5 -11   93.22   21.81
  -2   5 -11   98.41   25.31
  -2   5 -12    6.49    4.84
  -2   5 -12    8.85    5.46
  -2   5 -12    7.74    7.81
  -2   5 -13    1.41    2.76
  -2   5 -13    2.07    2.87
  -2   5 -13    0.90    3.63
  -2   5 -14    0.32    1.24
  -2   5 -14    8.36    4.15
   2   6 -14    0.78    1.34
   2   6 -14    3.07   10.28
   2   6 -13    0.54    1.30
   2   6 -13   47.87   20.26
   2   6 -12    0.96    2.19
   2   6 -11    0.48    1.83
   2   6 -11   21.19   18.33
   2   6 -10   62.48   11.93
   2   6 -10  229.11   25.98
   2   6 -10  220.65   28.29
   2  -6  -9   10.94    6.02
   2   6  -9   15.15    6.40
   2   6  -9   21.28   11.29
   2   6  -9   24.80   18.64
   2   6  -9   14.36   16.34
   2  -6  -8    0.97    2.18
   2   6  -8    1.24    3.79
   2   6  -8    2.73    4.95
   2   6  -8    1.83    5.17
   2   6  -8    1.56    3.11
   2  -6  -7  241.68   27.25
   2   6  -7  223.63   28.90
   2   6  -7  221.25   28.69
   2   6  -7  214.47   45.68
   2   6  -7  182.58   23.06
   2  -6  -6   97.07   16.59
   2   6  -6  103.74   18.30
   2   6  -6   92.27   18.32
   2   6  -6   99.77   57.04
   2   6  -6   68.74   19.58
   2  -6  -5   35.65    9.47
   2   6  -5   42.51   24.28
   2   6  -5   37.83   12.79
  -2   6   5   35.23    8.63
   2   6  -5   45.22   19.38
   2  -6  -4  125.76   16.69
   2   6  -4  139.74   19.89
   2   6  -4  132.14   22.04
  -2   6   4  118.20   15.39
   2   6  -4  131.01   60.76
   2  -6  -3  563.75   34.14
   2   6  -3  544.08   37.35
   2   6  -3  541.28   36.24
  -2   6   3  510.67   32.17
   2   6  -3  457.23   30.42
   2  -6  -2  308.36   26.06
   2   6  -2  289.98   26.53
   2   6  -2  299.36   27.11
  -2   6   2  269.36   25.19
   2   6  -2  263.16   22.43
   2  -6  -1  248.05   22.93
   2   6  -1  254.37   25.54
  -2   6   1  235.38   23.51
   2   6  -1  214.41   19.29
   2  -6   0  143.50   17.85
   2   6   0  143.79   21.42
   2   6   0  130.33   16.91
   2  -6   1  130.51   16.69
   2   6   1  133.06   16.79
   2   6   1  138.18   16.89
  -2   6  -1  111.40   17.53
  -2   6  -1   99.41   14.80
   2  -6   2  430.02   29.45
   2   6   2  260.20   23.11
   2   6   2  397.57   26.43
  -2   6  -2  382.94   32.13
   2  -6   3   81.73   13.27
  -2   6  -3   74.02   14.95
  -2   6  -3   54.13    9.50
  -2   6  -3   71.27   13.64
   2  -6   4   61.35   11.88
  -2   6  -4   54.07   12.97
  -2   6  -4   47.36    9.68
  -2   6  -4   51.22   12.49
   2  -6   5  695.94   53.59
  -2   6  -5  671.67   56.10
  -2   6  -5  633.94   52.21
  -2   6  -5  552.89   44.43
  -2   6  -6  344.18   33.39
  -2   6  -6  337.94   35.22
  -2   6  -6  284.27   30.71
  -2   6  -6  321.98   34.55
   2  -6   7  166.67   21.45
  -2   6  -7  157.87   24.97
  -2   6  -7  181.86   24.93
  -2   6  -7  151.66   22.13
  -2   6  -7  169.07   29.02
   2  -6   8  177.02   37.03
  -2   6  -8  220.12   30.86
  -2   6  -8  213.25   31.11
  -2   6  -8  245.06   89.78
  -2   6  -9  168.70   22.30
  -2   6  -9  174.62   25.28
  -2   6 -10    0.81    2.24
  -2   6 -10   89.89   20.31
  -2   6 -10   95.04   20.93
  -2   6 -11    1.66    2.65
  -2   6 -11   67.86   14.08
  -2   6 -11   69.78   14.18
  -2   6 -12    1.08    2.04
  -2   6 -12   39.80   10.37
  -2   6 -12   39.94   21.90
  -2   6 -13    1.45    2.85
  -2   6 -13    0.30    2.05
   2   7 -13    6.95   15.28
   2   7 -12   28.32   39.02
   2   7 -11   24.81   20.18
   2   7 -10    1.12    2.84
   2   7 -10    1.07    5.54
   2   7  -9   28.78   19.70
   2   7  -9   31.33   21.87
   2   7  -8   34.88   11.73
   2   7  -8   35.56   24.03
   2   7  -8    0.50    1.31
   2  -7  -7    5.69    4.18
   2   7  -7    7.42    7.35
   2   7  -7    6.71    7.21
   2   7  -7    0.21    1.01
   2  -7  -6   98.64   15.88
   2   7  -6   96.86   16.66
   2   7  -6  123.73   23.49
   2   7  -6  100.44   32.93
   2  -7  -5   70.74   13.41
   2   7  -5   59.11   35.77
   2   7  -5   76.33   18.15
   2   7  -5   81.42   51.46
   2  -7  -4   59.55   11.94
   2   7  -4   60.94   14.10
   2   7  -4   68.06   16.26
  -2   7   4   64.91   12.89
   2   7  -4   62.61   34.50
   2  -7  -3  154.74   19.90
   2   7  -3  160.10   24.87
   2   7  -3  173.16   25.28
  -2   7   3  166.80   22.10
   2   7  -3  142.42   18.83
   2  -7  -2  217.05   24.22
   2   7  -2  217.58   28.28
   2   7  -2  241.44   28.82
  -2   7   2  226.42   27.04
   2   7  -2  200.45   22.55
   2  -7  -1   49.00   11.08
   2   7  -1   45.60   27.69
   2   7  -1   55.71   13.57
  -2   7   1   37.54    9.91
   2  -7   0  268.22   27.41
   2   7   0  243.95   28.25
   2   7   0  286.28   31.20
  -2   7   0  282.75   31.16
  -2   7   0  227.35   25.58
   2  -7   1  466.41   39.73
   2   7   1  376.49   35.27
   2   7   1  465.95   40.39
  -2   7  -1  455.52   43.25
  -2   7  -1  391.74   36.27
   2  -7   2   76.25   13.53
   2   7   2   52.25   10.89
   2   7   2   78.03   13.60
  -2   7  -2   50.49   14.77
  -2   7  -2   64.46   14.78
   2  -7   3 1145.94   80.30
  -2   7  -3 1154.16   81.24
  -2   7  -3 1130.32   84.39
   2  -7   4  815.40   57.81
  -2   7  -4  837.39   65.52
  -2   7  -4  827.00   64.01
   2  -7   5  127.33   17.84
  -2   7  -5  138.63   20.67
  -2   7  -5  175.60   81.16
  -2   7  -5  107.82   17.31
  -2   7  -5  142.36   37.47
  -2   7  -6   51.93   29.50
  -2   7  -6   73.61   18.30
  -2   7  -6   54.61   12.23
  -2   7  -6   75.24   17.18
  -2   7  -7   25.39   21.99
  -2   7  -7   21.54    7.89
  -2   7  -7   32.16   19.80
  -2   7  -8    3.15    4.10
  -2   7  -8    3.27    3.95
  -2   7  -8    5.40    5.82
  -2   7  -9    6.68    5.14
  -2   7  -9    8.95    7.82
  -2   7 -10   43.55   10.16
  -2   7 -10   44.10   45.23
  -2   7 -11   26.43    8.17
  -2   7 -11   29.25   13.09
  -2   7 -12    1.56    2.95
  -2   7 -12    0.10    1.64
   2   8 -12    0.57    2.13
   2   8 -11   38.55   10.01
   2   8 -10    3.01    3.20
   2   8 -10    1.81    4.39
   2   8  -9    2.37    3.29
   2   8  -9    3.25    5.54
   2   8  -8   22.69    9.27
   2   8  -8   17.19   17.64
   2   8  -7   52.37   14.85
   2   8  -7   33.04   32.15
   2   8  -6   49.48   13.79
   2   8  -6   30.08   29.96
   2   8  -5   90.13   17.02
   2   8  -5   71.06   13.07
   2   8  -4   10.88   20.03
   2   8  -4   31.72   12.59
  -2   8   4   20.08   23.00
   2   8  -4   28.17   18.54
   2   8  -3   49.84   26.68
  -2   8   3   55.64   12.74
  -2   8   3   81.93   16.13
   2   8  -3   23.98   30.81
   2   8  -2    5.69    7.90
  -2   8   2    6.53    8.34
   2   8  -2   17.60    9.48
  -2   8   2   14.17    7.08
   2   8  -1   24.70   38.01
  -2   8   1   28.40   35.23
   2   8  -1   59.43   15.62
  -2   8   1   51.16   13.53
  -2   8   1   31.69    8.91
   2   8   0   81.75   14.86
  -2   8   0  108.83   18.84
   2   8   0  117.19   18.93
  -2   8   0  134.93   22.96
  -2   8   0  105.59   16.58
  -2   8  -1  267.66   35.62
   2   8   1  322.80   38.70
  -2   8  -1  327.44   43.52
  -2   8  -1  268.53   33.53
  -2   8  -2  421.26   51.23
   2   8   2  482.92   57.22
  -2   8  -2  510.92   58.04
  -2   8  -2  413.75   47.53
  -2   8  -3  156.43   23.89
  -2   8  -3  201.94   32.81
  -2   8  -3  172.24   25.89
  -2   8  -4  194.60   26.37
  -2   8  -4  149.82   21.50
  -2   8  -5   56.41   14.15
  -2   8  -5   53.45   40.87
  -2   8  -6  122.87   24.41
  -2   8  -6  108.01   24.46
  -2   8  -7   49.82   11.98
  -2   8  -7    0.38    1.26
  -2   8  -7   34.52   20.98
  -2   8  -8   30.58    8.13
  -2   8  -8    0.15    0.73
  -2   8  -8   29.29   20.57
  -2   8  -9    0.04    0.56
  -2   8  -9   12.31   27.72
  -2   8 -10    0.39    0.89
  -2   8 -10    5.58   10.13
   2   9  -9    5.29    3.81
   2   9  -9    0.56    1.70
   2   9  -8    0.21    0.72
   2   9  -7   11.90    7.87
   2   9  -7    0.26    1.12
   2   9  -6   92.55   17.82
   2   9  -6    0.42    2.11
   2   9  -5    5.73    7.41
   2   9  -4   65.91   17.44
   2   9  -3  131.02   27.88
  -2   9   3    0.08    1.49
   2   9  -2  149.65   30.14
  -2   9   2  127.07   24.59
   2   9  -1   17.49   13.02
  -2   9   1   16.48   13.31
   2   9   0    7.56    7.24
  -2   9   0   10.23   10.34
   2   9   1    0.39    2.02
  -2   9  -1   49.88   15.17
  -2   9  -1    0.68    3.14
  -2   9  -2    0.18    1.46
  -2   9  -3    1.99    4.05
  -2   9  -4   -0.05    1.47
  -2   9  -5   58.63   22.34
  -2   9  -5   -0.17    1.92
  -2   9  -6   58.08   12.31
  -2   9  -6   50.88   14.23
  -2   9  -7    1.05    2.26
  -2   9  -7    0.91    3.29
  -2   9  -8    8.11   19.69
  -2   9  -9    0.82    6.16
   2  10  -7   14.95    5.40
   2  10  -6   10.20    6.19
   2  10  -5   11.90    5.78
   2  10  -4   50.34   12.25
   2  10  -3   18.88    9.10
  -2  10   3    0.84    1.63
   2  10  -2   10.29    6.39
  -2  10   2    0.64    1.53
   2  10  -1    0.29    2.04
  -2  10   1   77.42   15.06
   2  10   0    0.37    1.42
  -2  10   0   24.65   21.37
  -2  10  -1   67.30   13.16
  -2  10  -2   25.75    9.16
  -2  10  -3   27.35    9.57
  -2  10  -4   29.06    8.11
  -2  10  -5    0.55    2.80
  -2  10  -6   18.96    5.85
   3   0 -16    0.32    1.15
   3   0 -15    0.17    1.49
   3   0 -14   25.45    9.16
   3   0 -13   72.11   14.99
   3   0 -12   74.35   16.34
   3   0 -11  438.08   39.88
   3   0 -11  361.43   38.62
   3   0 -10    3.36    7.72
   3   0 -10    0.80    8.19
   3   0  -9   73.17   13.39
   3   0  -9   61.98   15.07
   3   0  -8   74.98   13.96
   3   0  -8   55.32   12.32
   3   0  -7  933.24   45.24
   3   0  -7  639.08   36.98
   3   0  -7  668.56   58.90
   3   0  -6  114.93   13.67
   3   0  -6   77.27   11.86
   3   0  -5 5814.68  154.83
   3   0  -4 1220.51   45.48
   3   0  -3 1496.01   50.34
   3   0  -3 1566.92   55.75
   3   0  -2 2043.88   61.97
   3   0  -1 1137.15   39.77
   3   0  -1 1197.76   49.63
   3   0   0  512.51   24.31
   3   0   0  515.72   26.84
   3   0   1  549.54   25.95
   3   0   2  437.19   23.48
   3   0   3  619.07   30.46
   3   0   4   14.79    6.18
   3   0   5    9.85    6.17
   3   0   5    9.67   10.08
   3   0   6   48.57   25.50
   3   0   6   33.75   19.60
   3   0   7  601.86   37.42
   3   0   8   62.38   31.79
   3   0   8   53.98   17.22
   3   0   9   16.17   13.45
   3   0   9   17.85   22.36
   3   0  10  463.07   44.21
   3   0  10  469.56   60.44
   3   0  11  204.42   28.81
   3   0  11  246.88   53.72
  -3   0 -12    0.94    5.63
  -3   0 -13   10.51    6.72
  -3   0 -13    4.21    3.27
  -3   0 -14    4.93    4.70
  -3   0 -15    0.84    1.66
   3   1 -16    0.41    1.46
   3  -1 -15    6.22    3.61
   3   1 -15   11.35    6.42
   3  -1 -14    6.53    5.69
   3   1 -14    9.05    8.11
   3  -1 -13   27.12    8.47
   3   1 -13   29.44   10.93
   3  -1 -12   39.72   12.67
   3  -1 -12   34.23   11.76
   3   1 -12   38.94   14.50
   3  -1 -11  276.44   32.00
   3   1 -11  241.77   27.67
   3  -1 -11  214.40   27.42
   3   1 -11  217.83   30.21
   3  -1 -10  585.25   38.14
   3   1 -10  591.63   34.81
   3  -1 -10  431.12   32.50
   3   1 -10  457.07   37.95
   3   1 -10  402.61   29.17
   3  -1  -9  294.28   27.47
   3   1  -9  269.31   22.73
   3  -1  -9  203.11   22.27
   3   1  -9  190.14   22.81
   3   1  -9  177.46   43.32
   3  -1  -8   51.29   11.80
   3   1  -8   51.12    9.75
   3  -1  -8   37.69   10.53
   3   1  -8   33.37   10.39
   3   1  -8   23.66   26.04
   3   1  -8   26.49   17.43
   3  -1  -7  108.87   15.47
   3   1  -7   98.50   12.23
   3  -1  -7   71.60   11.39
   3   1  -7   77.55   13.62
   3  -1  -7   55.45   41.12
   3   1  -7   70.87   30.73
   3   1  -7   65.96   27.05
   3  -1  -6  508.43   31.04
   3   1  -6  526.41   26.97
   3  -1  -6  327.46   23.71
   3   1  -6  372.39   27.06
   3   1  -6  429.60   26.55
   3   1  -6  359.76   25.91
   3   1  -5  285.91   18.08
   3   1  -4 2563.61   73.60
   3  -1  -4 2722.39   91.57
   3   1  -3 4510.07  113.79
   3  -1  -3 4675.00  128.79
   3   1  -2 2938.63   79.08
   3   1  -1 2064.89   57.46
   3  -1  -1 2298.65   72.59
   3   1  -1 2216.11   64.97
   3   1   0  117.93    9.00
   3  -1   0  128.80   12.56
   3  -1   0  133.76   23.72
   3   1   0  123.00   11.35
   3   1   1  207.44   12.96
   3  -1   1  219.77   17.53
   3   1   2  110.33   10.35
   3  -1   2  128.93   14.13
   3   1   3 3401.29   98.93
   3  -1   3 3523.14  105.64
   3   1   4 1881.00   70.55
   3  -1   4 1879.59   69.10
   3  -1   4 1411.59   59.63
   3   1   5 1348.36   53.91
   3  -1   5 1479.07   61.66
   3  -1   5 1108.25   51.88
   3   1   6  173.87   18.15
   3  -1   6  162.90   20.11
   3  -1   6  130.13   31.47
  -3   1  -6   82.24   33.99
   3   1   7   95.61   31.28
   3  -1   7  100.10   15.86
   3  -1   7   68.79   14.67
   3   1   7   82.24   17.26
  -3   1  -7   51.48   42.87
   3   1   8  117.07   57.13
   3  -1   8  124.96   44.45
   3  -1   8  122.26   19.84
   3   1   8  128.13   17.76
   3   1   9  291.25   30.11
   3  -1   9  267.20   57.43
   3  -1   9  274.29   49.73
   3   1   9  278.28   33.05
   3   1  10  582.75   46.77
   3  -1  10  606.88   49.67
   3  -1  10  656.63   59.57
   3   1  10  620.04   65.26
   3   1  11   43.57   56.72
   3  -1  11   78.79   46.98
   3   1  11  104.88   47.04
   3  -1  11  114.58   40.05
  -3   1 -12    4.73    7.74
  -3  -1 -12    2.59    4.44
  -3   1 -12    4.36    5.19
  -3  -1 -13   16.00    6.82
  -3   1 -13   17.30    9.09
  -3   1 -13   10.31    5.13
  -3  -1 -14   15.18    5.39
  -3   1 -14   15.15    7.33
  -3   1 -14    8.73    3.79
  -3   1 -15    5.91    3.51
   3   2 -16   -0.14    2.60
   3   2 -15    8.00    5.68
   3   2 -14   30.75   11.23
   3   2 -13    0.45    5.85
   3   2 -13    0.87    2.29
   3  -2 -12   64.97   16.39
   3  -2 -12   25.22   43.59
   3  -2 -12   60.89   15.33
   3   2 -12   59.13   17.14
   3   2 -12   46.36   35.43
   3  -2 -11  167.56   24.76
   3  -2 -11  182.89   23.85
   3  -2 -11  132.75   19.49
   3   2 -11  157.01   25.81
   3   2 -11  133.10   31.53
   3  -2 -10   35.90   12.02
   3  -2 -10   39.13   29.78
   3  -2 -10   24.81    9.17
   3   2 -10   29.55   11.91
   3   2 -10   33.26   17.06
   3  -2  -9   31.54   10.57
   3  -2  -9   33.36   24.69
   3  -2  -9   20.15    7.79
   3   2  -9   21.56   10.96
   3   2  -9   29.18   22.07
   3   2  -9   32.45   15.16
   3  -2  -8   56.05   12.97
   3  -2  -8   55.68   12.77
   3  -2  -8   34.40    9.69
   3   2  -8   41.88   11.29
   3   2  -8   40.82   24.25
   3   2  -8   45.66   23.90
   3  -2  -7  316.91   27.61
   3   2  -7  308.10   19.82
   3  -2  -7  314.11   28.13
   3  -2  -7  206.41   19.57
   3   2  -7  245.02   22.98
   3   2  -7  257.95   23.20
   3   2  -7  222.48   30.29
   3  -2  -6  613.12   36.83
   3   2  -6  465.75   22.80
   3  -2  -6  594.53   39.41
   3   2  -6  454.58   30.84
   3   2  -6  491.27   32.88
   3   2  -6  420.65   31.92
   3  -2  -5  980.77   45.80
   3  -2  -5 1001.62   54.90
   3   2  -5  727.83   37.51
   3   2  -5  809.51   40.94
   3   2  -5  688.89   36.85
   3  -2  -4 1284.42   52.84
   3  -2  -4 1321.44   59.84
   3  -2  -3 1259.93   51.26
   3  -2  -3 1325.99   55.06
   3  -2  -2  974.42   44.65
   3  -2  -1  745.48   37.90
   3   2  -1  703.72   26.66
   3   2   0  133.78    8.35
   3   2   1  469.58   17.16
   3   2   2 1397.00   43.14
   3   2   3 2522.57   78.57
   3  -2   3 2914.95   94.92
   3  -2   3 1975.34   68.81
   3   2   4  183.29   14.71
   3  -2   4  195.27   19.96
   3  -2   4  135.21   17.08
  -3   2  -4  129.69   15.01
   3   2   5 2891.09   86.65
   3  -2   5 3039.66  102.38
   3  -2   5 2368.79   81.90
   3   2   5 2537.33   78.62
  -3   2  -5 2027.65   75.23
   3   2   6  625.09   45.73
   3  -2   6  701.84   41.47
   3  -2   6  538.35   36.74
   3   2   6  602.63   36.14
  -3   2  -6  439.38   30.04
   3   2   7  344.21   24.16
   3  -2   7  368.77   30.37
   3  -2   7  317.90   47.29
   3   2   7  306.28   27.76
  -3   2  -7  250.82   23.35
   3   2   8   46.96   35.56
   3  -2   8   57.75   37.42
   3  -2   8   51.57   13.02
   3   2   8   57.82   28.32
  -3   2  -8   43.09   20.30
   3   2   9  149.90  151.64
   3  -2   9  240.33   35.14
   3  -2   9  230.28   34.48
   3   2   9  268.05   29.06
  -3   2  -9  193.52   24.28
   3   2  10    0.90    2.17
   3  -2  10    1.62    4.74
   3  -2  10    4.27    6.10
   3   2  10    2.77    7.96
  -3   2 -10    3.02    5.39
  -3  -2 -11    1.31    2.97
  -3   2 -11    2.95    5.88
  -3   2 -11    1.37    2.37
  -3  -2 -12   58.75   13.77
  -3   2 -12   67.82   18.22
  -3   2 -12   60.38   15.35
  -3   2 -13    4.44    5.69
  -3   2 -13    6.02    4.89
  -3   2 -14    2.94    3.55
  -3   2 -14    0.46    1.27
  -3   2 -15   10.82    4.55
   3   3 -16    2.10    3.16
   3   3 -15    0.93    3.50
   3   3 -14    4.33    5.01
   3   3 -14    1.80    3.93
   3   3 -13   17.99   15.41
   3   3 -13    8.14   11.06
   3   3 -12    4.87    7.53
   3   3 -12    3.56    3.76
   3  -3 -11  108.60   19.01
   3  -3 -11   82.34   17.00
   3   3 -11   78.66   17.10
   3   3 -11   71.91   42.77
   3  -3 -10  282.72   32.97
   3  -3 -10  272.85   37.24
   3   3 -10  254.13   32.30
   3   3 -10  230.57   25.72
   3   3 -10  241.73   32.34
   3  -3  -9   64.07   50.61
   3   3  -9   80.48   14.68
   3   3  -9   73.25   34.78
   3  -3  -8  267.38   25.80
   3  -3  -8  250.91   36.45
   3   3  -8  223.43   25.09
   3   3  -8  222.23   23.17
   3   3  -8  180.10   22.44
   3  -3  -7   64.70   13.79
   3  -3  -7   75.01   19.30
   3   3  -7   48.89   10.79
   3   3  -7   59.51   12.34
   3   3  -7   60.80   31.58
   3  -3  -6    8.42    7.76
   3  -3  -6   10.56    9.32
   3   3  -6    4.30    4.31
   3   3  -6    6.44    5.18
   3   3  -6    6.34    7.13
   3  -3  -5   23.74    8.71
   3  -3  -5   28.74   23.64
   3   3  -5   20.49    7.07
   3   3  -5   21.13    7.42
   3   3  -5   27.91   12.44
   3  -3  -4  397.48   28.75
   3  -3  -4  416.60   29.83
   3   3  -4  292.30   22.00
   3   3  -4  330.46   25.20
   3   3  -4  297.31   25.98
   3  -3  -3 1236.35   53.00
   3  -3  -3 1279.15   55.35
   3   3  -3  980.57   46.87
   3  -3  -2  337.57   25.58
   3  -3  -2  339.20   28.00
   3  -3  -1  549.72   32.69
   3  -3  -1  575.83   32.68
   3  -3   0 1796.04   67.10
   3  -3   1 2123.93   75.63
   3  -3   2   72.00   13.71
  -3   3  -2   50.76    9.69
   3  -3   3 1177.63   53.64
   3  -3   3  815.26   39.73
  -3   3  -3  903.74   42.75
   3  -3   4  242.17   24.09
   3  -3   4  174.74   18.41
   3   3   4  176.24   16.02
  -3   3  -4  174.60   17.85
  -3   3  -4  153.00   17.91
   3  -3   5  190.18   21.35
   3  -3   5  143.89   18.03
   3   3   5  144.87   15.71
  -3   3  -5  138.33   15.93
  -3   3  -5  131.41   17.38
   3  -3   6   12.78    8.31
   3  -3   6    7.87    9.78
   3   3   6    3.55    4.34
  -3   3  -6    5.11    6.61
   3  -3   7  486.06   36.07
   3  -3   7  396.23   33.22
   3   3   7  416.41   28.31
  -3   3  -7  363.66   30.21
   3  -3   8  107.08   18.70
   3  -3   8  143.30   76.65
   3   3   8  108.01   17.50
  -3   3  -8  121.80   66.37
   3  -3   9   46.62   37.24
   3  -3   9   63.84   50.17
   3   3   9   48.42   42.25
  -3   3  -9   47.86   19.95
   3  -3  10   59.16   42.33
   3  -3  10   86.99   21.28
   3   3  10    0.36    0.99
  -3   3 -10   72.71   45.20
  -3   3 -11  117.33   21.50
  -3   3 -11  109.98   19.46
  -3   3 -11  113.43   18.13
  -3   3 -12   52.07   14.58
  -3   3 -12   51.91   12.78
  -3   3 -12   43.91    9.99
  -3   3 -13    8.74    5.61
  -3   3 -13   12.52    5.95
  -3   3 -14    1.52    3.22
  -3   3 -14    0.64    1.60
   3   4 -15    1.56    4.50
   3   4 -15    0.14    0.48
   3   4 -14    8.41    7.20
   3   4 -14    3.30    6.37
   3   4 -13    5.59    6.74
   3   4 -13    3.05    6.13
   3   4 -12   78.64   20.68
   3   4 -12   88.23   52.60
   3   4 -11   12.75    9.09
   3   4 -11   20.44   12.78
   3  -4 -10   36.83   11.37
   3  -4 -10   15.89   19.40
   3   4 -10   24.76   10.70
   3   4 -10   19.47    9.88
   3   4 -10   25.71   16.18
   3  -4  -9  541.78   47.65
   3   4  -9  663.53   53.65
   3   4  -9  561.19   84.38
   3  -4  -8  122.94   18.70
   3  -4  -8  119.10   20.56
   3   4  -8  103.52   17.02
   3   4  -8  116.28   18.74
   3   4  -8   99.16   62.80
   3  -4  -7  564.94   38.29
   3  -4  -7  538.52   34.95
   3   4  -7  463.80   32.67
   3   4  -7  487.09   36.14
   3   4  -7  421.17   54.88
   3  -4  -6  247.97   25.13
   3  -4  -6  230.66   22.97
   3   4  -6  191.61   20.79
   3   4  -6  200.97   22.76
  -3   4   6  213.51   19.50
   3   4  -6  189.40   24.32
   3  -4  -5  363.27   28.48
   3  -4  -5  348.53   32.33
   3   4  -5  286.58   23.51
   3   4  -5  325.58   27.32
  -3   4   5  324.21   23.88
   3   4  -5  297.06   27.59
   3  -4  -4  175.34   19.98
   3  -4  -4  180.67   19.95
   3   4  -4  137.79   15.07
   3   4  -4  165.81   20.41
  -3   4   4  140.76   16.07
   3   4  -4  152.71   19.86
   3  -4  -3  224.69   22.08
   3  -4  -3  202.56   33.89
   3   4  -3  149.95   14.99
   3   4  -3  194.84   19.82
  -3   4   3  181.58   18.16
   3   4  -3  164.98   18.13
   3  -4  -2  160.06   19.27
   3  -4  -2  166.60   39.31
   3   4  -2  151.64   17.37
  -3   4   2  133.19   15.87
   3   4  -2  136.51   16.13
   3  -4  -1  149.10   17.80
  -3   4   1  131.37   15.75
   3   4  -1  133.60   16.64
   3  -4   0   66.50   12.54
   3   4   0   56.24   10.78
  -3   4   0   43.65   10.16
   3   4   0   58.12   29.39
   3  -4   1  679.76   38.90
   3   4   1  640.77   34.13
  -3   4  -1  557.83   34.36
   3   4   1  572.20   38.55
   3  -4   2  353.99   27.77
  -3   4  -2  282.56   25.18
   3  -4   3  248.20   23.78
   3  -4   3  170.20   17.87
  -3   4  -3  219.09   21.91
  -3   4  -3  173.90   20.00
   3  -4   4  447.49   33.08
   3  -4   4  334.96   25.93
  -3   4  -4  353.73   28.25
  -3   4  -4  321.50   28.44
   3  -4   5  440.44   32.67
   3  -4   5  314.46   39.69
  -3   4  -5  344.83   27.51
  -3   4  -5  299.75   27.38
   3  -4   6  231.69   23.89
   3  -4   6  188.21   25.20
  -3   4  -6  179.94   20.63
  -3   4  -6  161.57   22.00
   3  -4   7  117.73   18.89
   3  -4   7   93.35   24.04
  -3   4  -7   92.28   17.91
   3  -4   8   12.28    6.39
   3  -4   8   13.51   11.88
  -3   4  -8   15.94   11.48
   3  -4   9   15.35   15.11
  -3   4  -9   20.07   13.95
  -3   4 -10   60.88   14.02
  -3   4 -10   73.38   16.40
  -3   4 -10   71.15   17.45
  -3   4 -11   21.52   15.83
  -3   4 -11   22.93   16.29
  -3   4 -11   22.75   24.22
  -3   4 -12   14.56    9.39
  -3   4 -12   11.33    6.50
  -3   4 -12    3.59    9.01
  -3   4 -13    8.84    5.33
  -3   4 -13    7.18    4.99
  -3   4 -14    4.99    3.63
  -3   4 -14    1.60    2.00
   3   5 -14    2.90    4.77
   3   5 -14    1.73    2.48
   3   5 -13    8.83    5.77
   3   5 -13    6.97    9.04
   3   5 -12   45.45   11.99
   3   5 -12   47.20   22.07
   3   5 -11  138.84   20.44
   3   5 -11  145.37   79.56
   3   5 -10  496.05   57.20
   3   5 -10  448.63   51.46
   3   5 -10  467.64   59.39
   3  -5  -9   96.53   17.31
   3  -5  -9   58.23   40.09
   3   5  -9   94.22   18.11
   3   5  -9  108.65   19.87
   3   5  -9   96.75   63.81
   3  -5  -8  139.32   21.20
   3  -5  -8  124.60   18.70
   3   5  -8  148.89   21.41
   3   5  -8  145.21   23.11
   3   5  -8  157.48   67.56
   3  -5  -7   50.14   12.86
   3  -5  -7   49.65   46.07
   3   5  -7   46.97   10.90
   3   5  -7   54.51   15.05
   3   5  -7   53.08   24.38
   3  -5  -6  146.99   20.54
   3  -5  -6  139.85   18.59
   3   5  -6  115.38   15.81
   3   5  -6  137.81   21.20
  -3   5   6  124.89   15.57
   3   5  -6  137.18   20.33
   3  -5  -5  142.60   18.95
   3  -5  -5  143.77   22.06
   3   5  -5  100.65   13.78
   3   5  -5  137.85   19.50
  -3   5   5  141.95   16.94
   3  -5  -4   53.85   11.83
   3  -5  -4   53.20   18.20
   3   5  -4   39.86    8.40
   3   5  -4   43.83   12.78
  -3   5   4   47.33   10.51
   3   5  -4   60.37   29.61
   3  -5  -3  296.90   27.21
   3   5  -3  303.16   28.56
  -3   5   3  266.82   24.96
   3  -5  -2  537.16   37.15
   3   5  -2  531.64   36.26
  -3   5   2  516.39   35.77
   3   5  -2  465.58   49.84
   3  -5  -1 1298.96   53.03
   3   5  -1 1214.91   53.41
   3   5  -1 1123.37   45.82
   3  -5   0  208.96   22.77
   3   5   0  226.54   21.88
  -3   5   0  205.15   22.14
   3   5   0  191.50   22.14
   3  -5   1    4.83    6.34
   3   5   1    2.74    3.25
  -3   5  -1    3.41    6.23
   3   5   1    2.83    4.84
   3  -5   2  678.04   41.08
   3   5   2  602.44   40.94
  -3   5  -2  566.75   38.73
   3  -5   3   62.81   13.49
  -3   5  -3   54.25   12.84
  -3   5  -3   41.13   12.06
   3  -5   4  135.32   19.62
  -3   5  -4  120.43   18.38
  -3   5  -4  103.32   18.28
   3  -5   5   13.67    8.39
   3  -5   5    7.53    6.66
  -3   5  -5    9.52    5.95
  -3   5  -5   11.81    9.76
   3  -5   6  189.19   23.97
   3  -5   6  139.15   35.72
  -3   5  -6  173.99   23.47
  -3   5  -6  160.73   23.94
   3  -5   7   21.36    8.48
  -3   5  -7   15.54    7.55
  -3   5  -7   21.35   11.95
   3  -5   8   13.52    6.42
  -3   5  -8   10.66    5.53
  -3   5  -8   12.33    7.16
  -3   5  -8   20.40   14.37
  -3   5  -9   46.01   10.81
  -3   5  -9   51.61   27.23
  -3   5  -9   60.42   27.09
  -3   5 -10   72.07   16.32
  -3   5 -10   81.14   19.61
  -3   5 -10   83.30   25.61
  -3   5 -11    0.62    2.14
  -3   5 -11   40.35   11.94
  -3   5 -11   36.12   38.66
  -3   5 -12    0.58    1.42
  -3   5 -12    4.71    4.54
  -3   5 -12    2.77    7.94
  -3   5 -13    0.04    0.99
  -3   5 -13    6.78    3.95
  -3   5 -13    0.20    0.93
   3   6 -14    2.94   10.39
   3   6 -13    0.30    1.04
   3   6 -13    0.50    1.09
   3   6 -12    0.95    1.98
   3   6 -12    5.12    8.48
   3   6 -11    0.82    1.99
   3   6 -11   44.91   17.54
   3   6 -11   60.92   31.88
   3   6 -10    1.49    2.58
   3   6 -10   32.14   10.43
   3   6 -10   36.36   17.11
   3   6  -9    0.33    2.44
   3   6  -9   -0.15    3.63
   3   6  -9    3.56    6.27
   3  -6  -8    4.63    4.56
   3   6  -8    7.80    4.94
   3   6  -8   11.27    8.98
   3   6  -8    8.38    8.40
   3  -6  -7   81.07   15.26
   3   6  -7   58.86   11.68
   3   6  -7   73.09   16.67
   3   6  -7   82.22   43.16
   3  -6  -6   25.21    8.91
   3   6  -6   25.94   12.30
   3   6  -6   20.98   14.93
   3  -6  -5  272.25   30.59
   3   6  -5  271.51   32.55
  -3   6   5  280.04   28.56
   3   6  -5  251.73   29.56
   3  -6  -4  132.57   18.61
   3   6  -4  144.25   21.96
  -3   6   4  120.57   17.21
   3   6  -4  119.03   17.77
   3  -6  -3  268.44   25.58
   3   6  -3  259.90   27.99
  -3   6   3  259.74   25.71
   3   6  -3  214.61   34.80
   3  -6  -2  107.43   16.57
   3   6  -2  111.64   19.66
  -3   6   2   96.00   17.06
   3   6  -2   87.68   14.59
   3  -6  -1   71.01   13.19
   3   6  -1   71.10   14.22
  -3   6   1   67.61   14.04
   3   6  -1   74.02   45.97
   3  -6   0  367.28   29.83
   3   6   0  387.43   30.00
  -3   6   0  353.28   31.06
   3   6   0  336.73   25.07
   3  -6   1  304.60   26.86
   3   6   1  312.23   25.56
  -3   6  -1  282.09   29.04
   3  -6   2    8.39    5.95
   3   6   2    4.84    4.30
  -3   6  -2    7.27    9.30
   3  -6   3 1035.37   73.43
  -3   6  -3  949.62   70.25
  -3   6  -3  883.57   66.85
   3  -6   4  559.51   46.72
  -3   6  -4  530.97   47.68
  -3   6  -4  451.61   38.54
  -3   6  -4  488.25   45.69
   3  -6   5  317.60   33.51
  -3   6  -5  323.08   35.65
  -3   6  -5  253.84   32.91
  -3   6  -5  285.91   34.03
   3  -6   6  267.44   28.88
  -3   6  -6  230.39   27.57
  -3   6  -6  264.52   30.98
  -3   6  -6  227.12   26.33
  -3   6  -6  252.72   37.32
  -3   6  -7   59.13   14.80
  -3   6  -7   69.67   15.80
  -3   6  -7   75.03   18.75
  -3   6  -8   48.85   30.58
  -3   6  -8   56.47   26.42
  -3   6  -9  213.40   37.49
  -3   6  -9  203.90   43.30
  -3   6 -10   34.61   10.09
  -3   6 -10   32.36   32.31
  -3   6 -11   12.57    6.47
  -3   6 -11   10.37   15.39
  -3   6 -12    2.10    2.86
   3   7 -13    6.83   20.64
   3   7 -12    2.71    6.17
   3   7 -11    5.64    7.13
   3   7 -11    9.85   17.14
   3   7 -10   27.55   11.50
   3   7 -10   27.48   20.17
   3   7  -9   86.37   16.53
   3   7  -9   70.23   30.72
   3   7  -8    2.15    5.46
   3   7  -8    1.31    6.98
   3   7  -7  255.30   28.94
   3   7  -7  202.59   25.53
   3  -7  -6  200.27   29.39
   3   7  -6  238.17   37.52
   3   7  -6  225.97   32.74
   3  -7  -5   17.15    7.19
   3   7  -5   20.31   11.49
  -3   7   5   21.18    7.44
   3   7  -5   25.56   23.87
   3  -7  -4  160.52   21.57
   3   7  -4  186.35   27.17
  -3   7   4  179.54   23.18
   3   7  -4  157.27   32.01
   3  -7  -3    5.76    4.15
   3   7  -3    8.07    8.55
  -3   7   3    9.03    7.75
   3   7  -3    7.30    6.50
   3  -7  -2  287.16   30.79
   3   7  -2  325.63   36.99
  -3   7   2  272.52   31.54
   3   7  -2  279.68   29.47
   3  -7  -1   99.50   16.60
   3   7  -1  116.24   20.28
  -3   7   1  107.51   20.04
   3   7  -1  100.09   17.09
   3  -7   0    7.42    4.68
   3   7   0   11.02    6.75
  -3   7   0   12.32    7.26
  -3   7   0   12.17    7.68
   3  -7   1   46.34   10.92
   3   7   1   46.15   11.31
  -3   7  -1   66.33   34.77
   3  -7   2  490.76   42.49
  -3   7  -2  510.85   47.24
  -3   7  -2  458.60   42.71
   3  -7   3  369.99   34.88
  -3   7  -3  377.31   40.25
  -3   7  -3  354.74   37.22
   3  -7   4  136.54   21.46
  -3   7  -4  152.36   26.41
  -3   7  -5    9.76   12.54
  -3   7  -5    0.42    1.14
  -3   7  -5   14.56    9.60
  -3   7  -6    8.12    6.44
  -3   7  -6    0.86    1.88
  -3   7  -6    9.27    6.71
  -3   7  -7   20.45   14.47
  -3   7  -7    0.09    0.97
  -3   7  -7   18.50   17.50
  -3   7  -8    3.64    3.62
  -3   7  -8    0.54    1.49
  -3   7  -8    3.13    4.55
  -3   7  -9    1.65    2.71
  -3   7  -9    4.37    4.85
  -3   7 -10   19.71    6.50
  -3   7 -11   15.00    5.22
  -3   7 -11   22.29    6.13
   3   8 -11    1.85    3.97
   3   8 -10    5.92   15.22
   3   8  -9  104.66   16.68
   3   8  -9   96.53   15.12
   3   8  -8    5.40    4.85
   3   8  -8    3.55    4.05
   3   8  -7   32.29   11.04
   3   8  -7   24.01   36.70
   3   8  -6   32.04   13.93
   3   8  -6   24.39   26.02
   3   8  -5  125.59   26.45
  -3   8   5   -0.01    1.88
   3   8  -5  107.13   22.63
   3   8  -4   42.10   14.06
  -3   8   4   28.75    8.39
   3   8  -4   25.02   23.45
  -3   8   4    0.63    2.43
   3   8  -3  982.19  567.41
  -3   8   3  868.76  502.15
   3   8  -3   -0.23    1.53
  -3   8   3  570.57  330.02
   3   8  -2   84.70   18.10
  -3   8   2   73.38   16.37
  -3   8   2   53.53   11.62
   3   8  -1   39.26   12.23
  -3   8   1   38.02   11.79
  -3   8   1   31.70   10.63
   3   8   0  139.42   19.26
  -3   8   0  136.38   22.24
  -3   8   0  125.07   18.45
   3   8   1    1.46    3.19
  -3   8  -1   92.08   17.11
  -3   8  -2  196.21   24.40
  -3   8  -2  192.82   23.91
  -3   8  -3   21.12    9.56
  -3   8  -3   18.33    8.60
  -3   8  -4   77.61   19.25
  -3   8  -4   71.86   38.44
  -3   8  -5  133.67   25.78
  -3   8  -5  115.45   23.62
  -3   8  -6   93.54   15.72
  -3   8  -6   79.72   15.92
  -3   8  -7   19.50    6.80
  -3   8  -7   13.55   17.11
  -3   8  -8    0.89    3.54
  -3   8  -9    3.54    6.97
   3   9  -9    4.04    5.17
   3   9  -8    2.36    3.42
   3   9  -8    0.21    1.41
   3   9  -7    5.67    5.53
   3   9  -7    0.08    0.90
   3   9  -6   15.18    7.44
   3   9  -6    0.44    2.06
   3   9  -5    4.50    5.91
   3   9  -5    0.21    0.85
   3   9  -4   27.46   10.07
  -3   9   4    0.50    1.74
   3   9  -3   72.81   16.10
  -3   9   3    2.54    3.17
   3   9  -2    9.21    6.79
  -3   9   2    5.63    6.01
  -3   9   1    1.24    3.00
   3   9   0    0.26    2.30
  -3   9   0    5.21    6.24
  -3   9   0    0.66    1.72
  -3   9  -1   92.71   19.67
  -3   9  -1    1.81    2.70
  -3   9  -2   93.55   17.91
  -3   9  -3   23.31    9.43
  -3   9  -3   12.99   22.03
  -3   9  -4  148.24   19.12
  -3   9  -4  110.52   20.17
  -3   9  -5   78.68   14.45
  -3   9  -5   57.46   11.08
  -3   9  -6    6.26    3.68
  -3   9  -6    5.37   10.50
  -3   9  -7    2.44    8.23
   3  10  -6    0.39    2.71
   3  10  -5   38.32    9.17
   3  10  -4    7.90    5.85
   3  10  -3   29.35    8.42
  -3  10   3    0.55    1.44
   3  10  -2    0.21    1.70
  -3  10   2    0.44    2.60
   3  10  -1    0.33    1.38
  -3  10   1    6.78    6.87
  -3  10   0    0.40    3.18
  -3  10  -1    3.18    8.20
  -3  10  -2   46.69   10.93
  -3  10  -3   41.48    9.32
  -3  10  -3    0.34    1.55
  -3  10  -4  111.14   13.09
   4   0 -14    1.96    4.02
   4   0 -13    3.24    4.39
   4   0 -12   -1.25   14.43
   4   0 -11   24.05   10.53
   4   0 -10  646.65   52.00
   4   0 -10  561.64   52.14
   4   0  -9 1032.11   69.59
   4   0  -9  809.76   62.38
   4   0  -9  619.14   48.22
   4   0  -8   15.72    6.06
   4   0  -8   10.30    7.72
   4   0  -8   10.27    7.28
   4   0  -7   76.87   11.81
   4   0  -7   62.62   14.16
   4   0  -7   69.53   29.40
   4   0  -7   38.27   29.75
   4   0  -6   10.03    4.42
   4   0  -6   15.66   10.12
   4   0  -6    8.86    5.30
   4   0  -6   12.70    8.23
   4   0  -6    6.44    7.65
   4   0  -5   14.21    4.90
   4   0  -5   16.31   17.26
   4   0  -5   12.25    7.12
   4   0  -5   15.33   12.11
   4   0  -5    6.60    4.95
   4   0  -4  834.25   36.74
   4   0  -4  863.78   56.20
   4   0  -4  596.78   34.80
   4   0  -4  747.92   40.21
   4   0  -4  577.83   32.96
   4   0  -3    2.82    2.71
   4   0  -3    2.56    4.82
   4   0  -3    2.03    4.54
   4   0  -3    0.78    3.21
   4   0  -3    1.23    2.40
   4   0  -2 1837.28   60.03
   4   0  -2 1921.80   73.72
   4   0  -2 1329.25   57.13
   4   0  -2 1804.45   72.87
   4   0  -1  545.19   27.14
   4   0  -1  542.25   30.85
   4   0  -1  389.12   27.23
   4   0  -1  524.03   31.31
   4   0   0  120.33   12.27
   4   0   0  118.72   13.27
   4   0   0   85.10   13.00
   4   0   1  435.06   24.77
   4   0   1  326.33   26.69
   4   0   2  198.13   17.04
   4   0   2  150.25   17.05
   4   0   3  208.49   18.07
   4   0   3  186.59   19.39
   4   0   4  473.64   29.26
   4   0   4  414.80   30.38
   4   0   5  162.28   18.08
   4   0   5  135.17   19.26
   4   0   6   92.55   46.26
   4   0   6   87.40   15.62
   4   0   7   12.76    9.73
   4   0   7   12.99   15.87
   4   0   8   33.69   30.84
   4   0   9   66.76   41.94
   4   0   9  115.31   66.21
   4   0  10   62.48   46.88
   4   0  11   49.01   50.34
  -4   0 -12    9.85    5.92
  -4   0 -13   48.44   10.47
  -4   0 -13   30.66    6.96
  -4   0 -14    7.67    4.20
   4   1 -16    2.56    2.24
   4   1 -15    5.11    4.61
   4  -1 -14   47.19    9.83
   4   1 -14   48.83   11.87
   4  -1 -13   19.85   13.61
   4   1 -13   29.92   11.45
   4  -1 -12  112.64   17.33
   4   1 -12  113.53   18.67
   4  -1 -11  160.37   21.44
   4  -1 -11  156.54   24.04
   4  -1 -11  139.71   22.35
   4   1 -11  140.94   23.84
   4  -1 -10  250.08   27.96
   4  -1 -10  254.45   31.09
   4  -1 -10  208.81   26.78
   4   1 -10  219.85   29.82
   4   1 -10  160.50   56.62
   4  -1  -9  373.07   29.89
   4  -1  -9  371.38   32.81
   4  -1  -9  278.00   27.08
   4   1  -9  311.85   31.05
   4   1  -9  364.30   30.32
   4   1  -9  291.92   25.97
   4  -1  -8   61.65   12.25
   4  -1  -8   69.69   56.10
   4  -1  -8   44.93   11.58
   4   1  -8   46.10   12.37
   4  -1  -8   46.37   29.93
   4   1  -8   47.30   37.42
   4   1  -8   35.44   26.25
   4  -1  -7  406.72   30.52
   4  -1  -7  390.80   38.70
   4  -1  -7  296.79   26.38
   4   1  -7  309.27   28.82
   4  -1  -7  320.53   42.35
   4   1  -7  360.37   29.41
   4   1  -7  296.55   25.28
   4  -1  -6  176.60   19.50
   4  -1  -6  172.58   22.73
   4  -1  -6  123.27   16.35
   4   1  -6  118.02   16.80
   4  -1  -6  142.88   66.35
   4   1  -6  135.45   30.28
   4   1  -6  112.49   26.34
   4   1  -5    8.14    3.32
   4  -1  -5   12.35    5.86
   4  -1  -5   14.32   11.17
   4  -1  -5    8.32    5.74
   4   1  -5    9.15    6.47
   4  -1  -5   29.98   21.09
   4   1  -5   12.78    9.09
   4   1  -5   11.14    5.53
   4   1  -4  171.76   13.11
   4  -1  -4  189.38   17.95
   4  -1  -4  194.29   24.44
   4   1  -4  193.58   18.88
   4  -1  -4  134.88   16.19
   4   1  -4  141.22   17.38
   4  -1  -4  162.66   34.98
   4   1  -4  160.92   18.56
   4   1  -4  136.00   16.94
   4   1  -3  973.21   35.32
   4  -1  -3  928.71   42.55
   4  -1  -3 1097.77   49.52
   4   1  -3 1077.53   44.88
   4  -1  -3  759.31   38.46
   4   1  -3  780.06   40.25
   4  -1  -3  886.40   44.44
   4   1  -3  909.86   51.61
   4   1  -3  770.41   49.40
   4   1  -2  223.25   13.93
   4  -1  -2  218.48   18.43
   4  -1  -2  230.60   20.51
   4   1  -2  233.53   19.17
   4  -1  -2  157.15   17.03
   4   1  -2  178.10   17.71
   4  -1  -2  183.99   18.97
   4   1  -2  217.45   19.80
   4   1  -2  168.96   27.47
   4   1  -1  217.99   13.64
   4  -1  -1  241.84   19.57
   4  -1  -1  257.34   22.34
   4   1  -1  240.13   17.61
   4  -1  -1  174.62   17.54
   4   1  -1  180.29   17.83
   4  -1  -1  235.20   21.05
   4   1  -1  224.24   19.69
   4   1   0  391.27   19.67
   4  -1   0  421.65   26.15
   4  -1   0  436.42   29.75
   4   1   0  417.74   27.35
   4  -1   0  318.78   23.85
   4   1   0  342.15   25.11
   4  -1   0  412.03   26.56
   4   1   0  411.50   27.00
   4  -1   1  138.93   15.44
   4  -1   1  100.75   13.30
   4   1   1   99.99   13.53
   4   1   2  241.87   16.89
   4  -1   2  242.03   21.09
   4  -1   2  186.54   19.73
   4   1   2  204.08   20.42
   4   1   3 1075.90   40.75
   4  -1   3 1116.61   48.56
   4  -1   3  842.98   42.35
   4   1   3  945.07   45.67
   4   1   4  203.09   17.12
   4  -1   4  222.42   21.87
   4  -1   4  171.64   20.80
   4   1   4  185.11   20.01
  -4   1  -4  131.36   15.83
   4   1   5  177.05   17.37
   4  -1   5  182.08   20.84
   4  -1   5  151.58   31.43
   4   1   5  165.43   36.09
   4   1   6  522.73   30.06
   4  -1   6  520.71   34.47
   4  -1   6  446.25   34.81
   4   1   6  460.73   32.59
   4   1   7  158.88   18.26
   4  -1   7  157.15   21.02
   4  -1   7  149.27   42.99
   4   1   8   85.32   32.36
   4  -1   8  120.41   20.20
   4  -1   8   95.19   38.06
   4  -1   9  158.92   32.23
   4  -1   9  178.26   54.68
   4   1   9  175.26   24.34
   4  -1  10   22.77   19.51
   4   1  10   22.06   23.49
   4  -1  11   90.41   50.92
   4   1  11   91.35   22.90
  -4  -1 -12   36.39    9.63
  -4   1 -12   36.85   11.15
  -4  -1 -13   10.24    4.73
  -4   1 -13   12.13    6.28
  -4   1 -13   13.43    5.47
  -4   1 -14    2.03    2.65
   4   2 -16    1.55    2.08
   4   2 -15   11.71    5.63
   4   2 -14    4.94    4.41
   4   2 -13   18.87   14.00
   4   2 -12    7.44    6.86
   4   2 -12    1.67    4.92
   4  -2 -11   77.74   16.76
   4  -2 -11   60.36   26.52
   4  -2 -11   66.17   15.90
   4   2 -11   71.94   18.20
   4   2 -11   53.38   58.23
   4  -2 -10  138.11   21.34
   4  -2 -10  119.10   57.45
   4  -2 -10  106.53   17.52
   4   2 -10  123.48   24.92
   4   2 -10  130.99   26.31
   4   2 -10  110.18   29.96
   4  -2  -9  351.03   35.31
   4  -2  -9  341.05   35.31
   4  -2  -9  244.68   27.86
   4   2  -9  272.61   32.80
   4   2  -9  300.83   71.96
   4   2  -9  287.40   32.28
   4  -2  -8  170.24   21.19
   4  -2  -8  168.12   21.68
   4  -2  -8  127.08   17.15
   4   2  -8  138.12   20.19
   4   2  -8  135.38   49.64
   4   2  -8  134.26   71.67
   4  -2  -7    0.95    6.85
   4  -2  -7    1.67    5.58
   4   2  -7    2.61    4.11
   4   2  -7    4.70    5.46
   4   2  -7    4.46    2.54
   4  -2  -6  147.02   19.03
   4  -2  -6  162.43   32.69
   4  -2  -6  107.81   15.11
   4   2  -6  120.40   17.31
   4   2  -6  131.58   42.81
   4   2  -6  109.77   27.56
   4  -2  -5  235.00   22.51
   4  -2  -5  249.03   34.08
   4  -2  -5  154.05   16.62
   4   2  -5  189.74   20.01
   4   2  -5  237.08   84.05
   4   2  -5  188.31   21.02
   4  -2  -4  196.23   19.90
   4  -2  -4  201.62   24.11
   4  -2  -4  131.39   15.57
   4   2  -4  158.84   17.94
   4   2  -4  180.50   21.06
   4   2  -4  156.03   19.10
   4  -2  -3  923.88   45.45
   4  -2  -3  917.85   57.41
   4   2  -3  927.11   39.68
   4  -2  -3  612.20   33.27
   4   2  -3  724.14   39.01
   4   2  -3  900.05   44.44
   4   2  -3  697.29   47.39
   4  -2  -2  771.09   39.90
   4  -2  -2  777.01   40.80
   4   2  -2  780.77   34.06
   4  -2  -2  539.64   31.52
   4   2  -2  624.89   34.67
   4   2  -2  786.33   40.81
   4   2  -2  603.16   38.87
   4  -2  -1  149.94   17.24
   4  -2  -1  142.49   24.11
   4  -2  -1   98.70   13.30
   4   2  -1  117.17   14.24
   4   2  -1  146.93   27.58
   4   2  -1   80.43   13.18
   4  -2   0  429.73   29.15
   4  -2   0  294.27   22.71
   4   2   0  396.26   26.48
   4  -2   1 1011.97   47.52
   4  -2   1  755.76   38.76
   4   2   1  828.07   42.36
   4   2   1  992.39   44.27
   4  -2   2  195.14   20.76
   4  -2   2  156.56   18.06
   4   2   2  159.43   17.00
   4   2   2  181.78   19.50
   4  -2   3  297.14   25.82
   4  -2   3  235.60   22.61
   4   2   3  246.78   21.66
   4  -2   4  123.93   18.11
   4  -2   4  102.96   17.68
   4   2   4  107.84   15.16
  -4   2  -4  101.29   14.74
  -4   2  -4   82.39   13.45
   4  -2   5  809.37   42.50
   4  -2   5  652.95   41.35
   4   2   5  705.75   58.27
  -4   2  -5  542.27   33.06
   4  -2   6  248.26   25.56
   4  -2   6  201.69   25.44
   4   2   6  217.25   23.71
  -4   2  -6  165.21   19.37
   4  -2   7  132.02   20.27
   4  -2   7  114.52   23.51
   4   2   7  124.61   63.68
  -4   2  -7   95.12   17.80
   4  -2   8  455.41   42.78
   4  -2   8  398.41   45.99
   4   2   8  450.68   47.31
  -4   2  -8  326.93   34.73
   4  -2   9   17.99   26.21
   4  -2   9   47.28   31.77
   4   2   9   39.82   26.28
   4  -2  10   53.41   49.04
   4   2  10   43.79   31.41
   4  -2  11  118.27   25.00
   4   2  11    0.27    1.34
  -4  -2 -12   16.38    5.92
  -4   2 -12   23.79    9.42
  -4   2 -12   23.73    8.87
  -4   2 -13   10.38    6.57
  -4   2 -13    9.15    4.38
  -4   2 -14   10.32    4.43
   4   3 -15   13.72    6.44
   4   3 -14   13.16    8.28
   4   3 -13    5.07    5.86
   4   3 -13    0.66    3.08
   4   3 -12   13.15   11.51
   4   3 -12    6.30   14.49
   4   3 -11   13.40    9.07
   4   3 -11   10.98    9.45
   4  -3 -10   73.87   15.68
   4  -3 -10   45.02   48.40
   4   3 -10   65.77   17.27
   4   3 -10   56.49   43.39
   4   3 -10   60.87   30.78
   4  -3  -9   18.47    8.99
   4  -3  -9   13.93   16.51
   4   3  -9   15.23    7.46
   4   3  -9   16.95   11.59
   4   3  -9   14.31    7.70
   4  -3  -8  673.05   57.40
   4  -3  -8  636.55   71.25
   4   3  -8  622.12   52.54
   4   3  -8  520.74   72.01
   4  -3  -7  484.22   34.63
   4  -3  -7  479.14   39.37
   4   3  -7  398.85   31.72
   4   3  -7  437.12   36.10
   4   3  -7  370.49   34.59
   4  -3  -6   25.91   10.17
   4  -3  -6   23.48   16.55
   4   3  -6   11.33    6.13
   4   3  -6   10.72    8.18
   4   3  -6   15.22    9.12
   4  -3  -5   32.83   10.53
   4  -3  -5   37.32   27.00
   4   3  -5   27.88    8.78
   4   3  -5   41.54   25.14
   4   3  -5   27.36   18.53
   4  -3  -4  220.22   22.59
   4  -3  -4  220.35   23.02
   4   3  -4  180.75   19.59
   4   3  -4  214.86   53.12
   4   3  -4  176.18   20.16
   4  -3  -3  244.08   23.73
   4  -3  -3  258.83   26.39
   4   3  -3  193.36   19.40
   4   3  -3  246.03   24.53
   4   3  -3  141.08   23.50
   4  -3  -2  305.66   25.99
   4  -3  -2  320.02   30.46
   4  -3  -2  202.59   18.87
   4   3  -2  239.97   21.27
   4   3  -2  303.74   30.60
   4   3  -2  264.88   23.37
   4  -3  -1 1361.36   57.57
   4  -3  -1 1401.34   59.03
   4  -3  -1  884.05   40.18
   4   3  -1 1108.45   47.41
   4   3  -1 1194.99   52.75
   4  -3   0 1331.93   56.50
   4  -3   0  898.66   40.52
   4   3   0 1068.91   46.64
   4   3   0 1265.02   51.92
   4   3   0 1103.73   58.40
   4  -3   1  275.95   25.24
   4  -3   1  209.52   19.74
   4   3   1  240.99   21.02
   4   3   1  281.93   22.13
   4  -3   2  288.11   26.82
   4  -3   2  214.91   21.02
   4   3   2  251.33   21.56
   4   3   2  279.73   21.67
   4  -3   3  501.20   35.61
   4  -3   3  399.58   29.90
   4   3   3  444.51   29.89
  -4   3  -3  421.07   30.11
   4  -3   4  215.58   23.11
   4  -3   4  163.16   21.68
   4   3   4  174.99   18.26
  -4   3  -4  180.69   20.63
  -4   3  -4  151.26   19.24
   4  -3   5  233.70   25.12
   4  -3   5  205.00   79.04
   4   3   5  198.91   20.56
  -4   3  -5  174.81   19.60
  -4   3  -5  160.84   20.22
   4  -3   6  969.07   70.51
   4  -3   6  851.10   68.85
   4   3   6  890.69   65.94
  -4   3  -6  731.44   57.69
   4  -3   7  251.65   29.21
   4  -3   7  232.03   45.91
   4   3   7  240.02   37.31
  -4   3  -7  194.42   25.14
   4  -3   8  124.45   20.24
   4  -3   8  142.79   42.51
   4   3   8  130.57   18.57
  -4   3  -8  115.87   51.69
   4  -3   9  108.94   81.08
   4   3   9    0.35    1.33
  -4   3  -9   79.62   33.18
   4  -3  10   25.25   31.52
   4   3  10    0.56    1.93
  -4   3 -10   13.79   18.44
  -4   3 -11   36.21   10.93
  -4   3 -11   35.07   10.87
  -4   3 -12   18.13    8.09
  -4   3 -12   15.66    7.99
  -4   3 -13   13.42    6.48
  -4   3 -13   18.22    6.70
   4   4 -15    4.65    4.39
   4   4 -14    6.93    6.09
   4   4 -14    0.74    3.47
   4   4 -13    7.33    5.80
   4   4 -13    4.00    7.68
   4   4 -12   12.64    8.25
   4   4 -12    9.58   12.87
   4   4 -11   94.42   17.56
   4   4 -11   58.02   49.77
   4   4 -11   92.91   20.68
   4   4 -10   44.48   13.72
   4   4 -10   25.87   16.44
   4   4 -10   36.69   17.69
   4  -4  -9  965.82   69.11
   4  -4  -9  930.67   69.35
   4   4  -9  993.23  115.53
   4   4  -9  968.10   99.72
   4  -4  -8   82.21   16.85
   4   4  -8   78.47   16.81
   4   4  -8   79.15   30.31
   4   4  -8   70.52   54.37
   4  -4  -7  564.44   49.48
   4  -4  -7  550.62   46.89
   4   4  -7  483.16   44.10
   4   4  -7  546.95   48.92
  -4   4   7  499.99   42.28
   4   4  -7  438.61   57.69
   4  -4  -6  249.76   46.38
   4   4  -6  216.97   23.75
   4   4  -6  245.81   29.11
  -4   4   6  237.65   22.83
   4   4  -6  203.51   34.08
   4  -4  -5   52.38   12.53
   4  -4  -5   67.31   49.41
   4   4  -5   57.95   11.98
   4   4  -5   62.58   14.18
  -4   4   5   63.11   12.57
   4   4  -5   48.74   48.02
   4  -4  -4   60.31   13.68
   4  -4  -4   58.66   39.79
   4   4  -4   48.77   10.39
   4   4  -4   53.79   17.42
   4   4  -4   60.33   44.25
   4  -4  -3  209.65   24.00
   4  -4  -3  210.78   31.06
   4   4  -3  158.54   17.86
   4   4  -3  208.93   24.85
   4   4  -3  184.04   22.20
   4  -4  -2  453.43   34.60
   4   4  -2  366.07   27.07
   4   4  -2  451.65   33.06
   4   4  -2  407.65   31.35
   4  -4  -1  564.95   38.06
   4   4  -1  468.58   30.41
   4   4  -1  600.26   39.42
  -4   4   1  541.34   37.41
   4   4  -1  517.57   34.65
   4  -4   0    3.71    5.24
   4   4   0    3.05    2.85
   4   4   0    5.12    4.79
  -4   4   0    1.72    7.49
   4   4   0    4.88    7.05
   4  -4   1  125.90   20.00
   4   4   1   99.87   13.39
   4   4   1  118.70   29.64
  -4   4  -1   99.52   17.73
   4  -4   2    2.82    7.47
   4  -4   2    2.73    3.11
   4   4   2    0.59    2.15
   4   4   2    1.75    4.80
  -4   4  -2    1.36    7.03
   4  -4   3   26.39   11.17
   4  -4   3   21.33   17.60
   4   4   3   19.16    5.95
  -4   4  -3   20.29    9.86
  -4   4  -3   16.84    8.53
   4  -4   4   45.50   12.55
   4  -4   4   30.61   24.96
  -4   4  -4   36.64   10.85
  -4   4  -4   29.30   10.47
   4  -4   5   28.54   10.43
   4  -4   5   27.97   19.16
  -4   4  -5   26.67   10.26
  -4   4  -5   23.98    9.52
   4  -4   6    4.14    6.23
   4  -4   6    7.95    7.55
  -4   4  -6    2.33    3.93
  -4   4  -6    5.42    8.79
   4  -4   7  213.91   26.22
   4  -4   7  192.88   26.02
  -4   4  -7  182.54   25.92
   4  -4   8   60.97   15.92
  -4   4  -8   63.79   33.45
   4  -4   9    0.86    3.16
  -4   4  -9    0.33    3.52
  -4   4 -10    1.66    5.24
  -4   4 -10    0.43    5.89
  -4   4 -10    2.16    4.59
  -4   4 -11    4.58    5.09
  -4   4 -11    7.09    6.24
  -4   4 -11    2.42    5.14
  -4   4 -12    1.20    2.88
  -4   4 -12    2.48    3.47
  -4   4 -13    1.09    1.64
   4   5 -14   13.45    5.65
   4   5 -13   10.60    5.38
   4   5 -13    7.10    9.35
   4   5 -12    4.07    4.43
   4   5 -12    5.39    9.57
   4   5 -11   41.77   11.09
   4   5 -11   31.84   20.36
   4   5 -11   37.56   29.06
   4   5 -10   38.66   12.49
   4   5 -10   53.52   30.95
   4   5 -10   48.19   32.86
   4   5  -9    6.16    5.91
   4   5  -9    6.94    5.97
   4   5  -9   -1.19   13.41
   4  -5  -8  214.80   30.57
   4  -5  -8  160.84   43.84
   4   5  -8  217.33   30.28
   4   5  -8  241.63   34.72
   4   5  -8  221.14   34.52
   4  -5  -7  171.64   23.17
   4  -5  -7  163.93   21.77
   4   5  -7  163.49   22.00
   4   5  -7  176.10   27.83
  -4   5   7  176.78   21.10
   4   5  -7  146.79   24.69
   4  -5  -6  192.37   26.05
   4  -5  -6  225.08   27.32
   4   5  -6  246.04   27.58
   4   5  -6  306.63   37.23
  -4   5   6  269.00   29.04
   4   5  -6  272.41   45.11
   4  -5  -5  127.71   20.17
   4  -5  -5  120.05   18.96
   4   5  -5  100.33   15.93
   4   5  -5  141.70   23.75
  -4   5   5  127.29   19.46
   4   5  -5  116.85   42.34
   4  -5  -4   47.36   11.71
   4   5  -4   37.76    9.09
   4   5  -4   52.22   14.07
  -4   5   4   42.57   12.10
   4   5  -3    4.51    3.45
  -4   5   3    7.18    6.40
   4   5  -3    7.03    6.32
   4  -5  -2  112.24   17.13
   4   5  -2   81.31   12.18
   4   5  -2  106.56   18.97
  -4   5   2  108.77   17.70
   4  -5  -1   16.52    8.98
   4   5  -1   11.93    6.65
  -4   5   1   14.10    8.92
   4   5  -1   11.52   11.09
   4  -5   0  217.31   24.06
   4   5   0  225.90   23.96
  -4   5   0  175.03   25.43
   4   5   0  177.25   20.89
   4  -5   1  474.19   34.09
   4   5   1  448.11   30.27
  -4   5  -1  422.44   35.03
   4  -5   2   70.06   14.05
   4   5   2   42.96    9.40
  -4   5  -2   66.83   15.46
   4  -5   3   71.92   15.03
  -4   5  -3   66.90   15.98
  -4   5  -3   51.38   14.71
   4  -5   4    1.94    3.81
  -4   5  -4    1.38    8.11
  -4   5  -4    4.63    8.82
   4  -5   5  154.48   22.06
   4  -5   5  120.12   37.23
  -4   5  -5  152.08   22.21
  -4   5  -5  132.42   22.24
   4  -5   6  201.42   28.51
   4  -5   6  173.78   26.78
  -4   5  -6  184.37   27.41
  -4   5  -6  171.26   28.17
   4  -5   7   40.31   37.71
  -4   5  -7   64.84   28.30
  -4   5  -8    0.69    2.02
  -4   5  -8   45.43   13.29
  -4   5  -8   53.79   29.29
  -4   5  -9    0.28    1.97
  -4   5  -9   13.08    7.88
  -4   5  -9   16.92   12.70
  -4   5 -10    0.70    1.78
  -4   5 -10    0.55    3.98
  -4   5 -10    2.35    3.77
  -4   5 -11    0.70    1.57
  -4   5 -11    6.66    6.01
  -4   5 -11    1.21    6.15
  -4   5 -12    1.34    2.45
   4   6 -13    0.41    1.98
   4   6 -12    0.30    1.06
   4   6 -12    2.69    5.06
   4   6 -11    0.94    1.91
   4   6 -11   19.87   33.31
   4   6 -11   36.04   36.14
   4   6 -10    0.77    1.80
   4   6 -10   92.90   38.05
   4   6 -10   89.19   29.86
   4   6  -9    1.31    2.47
   4   6  -9   82.11   41.57
   4   6  -9   60.66   51.37
   4   6  -8    2.22    3.23
   4   6  -8   17.71   13.03
   4   6  -8   12.10   10.88
   4   6  -7    0.44    1.35
   4   6  -7   15.88   13.84
   4   6  -7   23.24   17.81
   4  -6  -6    3.29    3.77
   4   6  -6    1.77    2.11
   4   6  -6    5.83   10.26
  -4   6   6    3.56    3.74
   4  -6  -5   70.42   14.44
   4   6  -5   66.32   17.56
  -4   6   5   76.89   14.78
   4   6  -5   66.63   20.32
   4  -6  -4   83.62   15.71
   4   6  -4   86.80   19.08
  -4   6   4   96.47   18.26
   4   6  -4   82.06   42.24
   4   6  -3   55.61   16.42
   4   6  -3   46.38   28.10
   4  -6  -2  723.93   60.02
  -4   6   2  742.85   62.88
   4   6  -2  714.40   56.19
   4  -6  -1  317.16   33.61
   4   6  -1  347.14   37.35
  -4   6   1  301.54   34.02
   4   6  -1  289.57   30.55
   4  -6   0  120.64   19.13
   4   6   0  127.02   20.39
  -4   6   0  117.54   21.49
   4  -6   1  116.46   18.89
   4   6   1  117.76   68.81
  -4   6  -1  117.81   21.70
  -4   6  -1  106.61   19.84
   4  -6   2  234.87   27.99
  -4   6  -2  211.04   28.39
  -4   6  -2  198.15   27.49
   4  -6   3  103.28   17.24
  -4   6  -3  105.56   21.04
  -4   6  -3   86.91   19.38
   4  -6   4  180.31   26.89
  -4   6  -4  183.46   29.46
  -4   6  -4  157.17   22.47
  -4   6  -4  164.08   27.50
  -4   6  -5  430.65   35.04
  -4   6  -5  316.23   28.34
  -4   6  -5  365.42   34.25
  -4   6  -6   80.36   14.50
  -4   6  -6   63.14   12.30
  -4   6  -6   78.57   32.25
  -4   6  -7   79.29   16.46
  -4   6  -7   63.14   14.85
  -4   6  -7   76.85   26.15
  -4   6  -8  194.16   20.96
  -4   6  -8  226.01   23.65
  -4   6  -9    9.60    5.96
  -4   6  -9   11.63   10.57
  -4   6 -10   24.22    7.30
  -4   6 -10   25.66    7.04
   4   7 -12   23.63   25.23
   4   7 -11   10.69   22.78
   4   7 -10   23.65   23.88
   4   7 -10   17.27   27.90
   4   7  -9   60.86   26.42
   4   7  -9   34.20   37.37
   4   7  -8   56.01   14.17
   4   7  -8   39.01   34.30
   4   7  -7    7.11    9.35
   4   7  -7    5.49    6.63
   4   7  -6    9.60   10.03
  -4   7   6    1.22    2.86
   4   7  -6    6.22    7.89
   4   7  -5    8.28    8.82
  -4   7   5    5.52    4.38
   4   7  -5    5.80    9.02
   4   7  -4    8.71    9.05
  -4   7   4   10.67    6.34
   4   7  -4    8.91   11.87
   4   7  -3  852.90   50.06
  -4   7   3  755.36   78.05
   4   7  -3  710.48   42.74
   4  -7  -2    7.12    5.00
   4   7  -2   10.49    8.92
  -4   7   2    8.81    7.47
   4   7  -2    6.88    7.57
   4  -7  -1  155.30   23.75
   4   7  -1  201.29   29.93
   4  -7   0   38.27   10.52
   4   7   0   44.55   11.56
  -4   7   0   44.53   14.71
  -4   7   0   35.86   11.44
   4   7   1   27.76    9.40
  -4   7  -1   31.66   13.52
  -4   7  -1   27.52   11.46
  -4   7  -2   24.09   16.10
  -4   7  -2   17.73    8.46
  -4   7  -3   13.95    8.46
  -4   7  -3   20.44   11.10
  -4   7  -4   44.54   13.41
  -4   7  -4   37.81   15.14
  -4   7  -5   48.17   13.96
  -4   7  -5   43.78   13.85
  -4   7  -6   46.67   10.53
  -4   7  -6   44.64   12.51
  -4   7  -7   28.58    7.69
  -4   7  -7    0.44    1.10
  -4   7  -7   40.94   28.80
  -4   7  -8    0.68    1.37
  -4   7  -8   18.80   19.89
  -4   7  -9    1.59    2.01
  -4   7  -9   28.82    7.51
  -4   7 -10    0.46    2.41
   4   8 -10    0.25    4.07
   4   8  -9    3.93    8.97
   4   8  -8   25.19   20.49
   4   8  -8   11.30   22.02
   4   8  -7   75.08   46.72
   4   8  -7   58.83   11.46
   4   8  -6    4.02    5.09
   4   8  -6    1.54    5.92
  -4   8   5    0.30    1.92
   4   8  -4   85.04   17.14
  -4   8   4   37.48    9.68
   4   8  -4    1.18    2.57
  -4   8   4    0.12    1.94
   4   8  -3  115.57   24.96
  -4   8   3  112.67   22.77
   4   8  -3    0.40    0.74
  -4   8   3   89.71   19.06
   4   8  -2   14.06   11.34
  -4   8   2   12.92   10.79
  -4   8   2   13.69   12.21
   4   8  -1   73.79   17.59
  -4   8   1   66.15   18.14
  -4   8   1   52.93   14.66
   4   8   0    0.25    1.35
  -4   8   0   15.76   13.23
  -4   8   0   11.27   10.75
  -4   8  -1   83.18   19.41
  -4   8  -1   70.99   17.59
  -4   8  -2   82.08   15.80
  -4   8  -2   69.71   15.10
  -4   8  -3   26.21    9.69
  -4   8  -3   26.36   11.38
  -4   8  -4   29.15    8.84
  -4   8  -4   28.83   29.03
  -4   8  -5   21.63   28.94
  -4   8  -5   23.38    8.42
  -4   8  -6    6.02   10.91
  -4   8  -7    6.63   15.07
  -4   8  -8    1.11    6.48
   4   9  -8   10.14   13.74
   4   9  -7   12.42   14.22
   4   9  -7    0.22    0.58
   4   9  -6    1.43    4.35
   4   9  -5    0.06    5.06
   4   9  -4   41.83   11.67
  -4   9   4    0.18    2.08
  -4   9   3    0.27    0.79
  -4   9   3    0.40    1.63
   4   9  -2    3.62    5.47
  -4   9   2    0.61    1.77
   4   9  -1    0.44    2.00
  -4   9   1   42.84   10.65
  -4   9   1    1.26    2.78
  -4   9   0    3.38    4.69
  -4   9   0    1.79    2.85
  -4   9  -1    1.08    4.77
  -4   9  -1    1.58    3.79
  -4   9  -2    7.65    6.58
  -4   9  -2    7.55    6.31
  -4   9  -3  100.03   15.01
  -4   9  -3   80.61   13.52
  -4   9  -4   15.08   13.70
  -4   9  -4    7.18   23.48
  -4   9  -5   26.94    6.87
  -4   9  -5   28.32    7.04
  -4   9  -6    2.20    7.08
  -4  10   1   41.98    8.03
  -4  10   0    0.54    2.53
  -4  10  -1   13.78   14.10
  -4  10  -2   15.34    5.96
   5   0 -14   43.59    9.42
   5   0 -13   29.68    8.55
   5   0 -12   10.64    8.63
   5   0 -11   12.68    6.94
   5   0 -10  419.05   48.57
   5   0 -10  420.99   50.10
   5   0 -10  343.45   40.15
   5   0  -9    3.63    7.38
   5   0  -9    4.77   11.89
   5   0  -9    3.04    4.96
   5   0  -8    2.48    4.63
   5   0  -8    1.84    5.31
   5   0  -8    2.86    3.94
   5   0  -7   13.01   14.01
   5   0  -7   15.21    8.15
   5   0  -7   12.86    7.39
   5   0  -7   11.26    9.80
   5   0  -6   60.94   50.82
   5   0  -6   56.17   14.81
   5   0  -6   74.73   35.15
   5   0  -5  261.35   24.82
   5   0  -5  197.51   22.48
   5   0  -5  257.10   24.84
   5   0  -4   39.24   31.32
   5   0  -4   27.16   11.08
   5   0  -4   44.11   24.77
   5   0  -3  196.60   19.89
   5   0  -3  145.18   19.77
   5   0  -3  184.95   26.78
   5   0  -2  257.93   19.26
   5   0  -2  280.12   22.58
   5   0  -2  219.23   23.40
   5   0  -2  290.98   43.12
   5   0  -1  565.90   29.94
   5   0  -1  594.64   34.62
   5   0  -1  475.97   33.86
   5   0  -1  593.28   43.18
   5   0   0  179.31   16.67
   5   0   0  149.15   19.62
   5   0   0  210.66   28.42
   5   0   1    6.34    4.38
   5   0   1   10.23    6.75
   5   0   1   15.01    8.27
   5   0   2  492.52   27.90
   5   0   2  416.93   34.11
   5   0   3  354.60   24.99
   5   0   3  302.44   29.71
   5   0   4   47.40   10.58
   5   0   4   47.76   13.89
   5   0   5   88.35   14.29
   5   0   5   84.25   18.25
   5   0   6   26.28   14.42
   5   0   7    1.82    5.95
   5   0   8  361.67   34.48
   5   0   9    2.34    6.04
   5   0  10   13.36   12.58
   5   0  11   19.32   35.86
  -5   0 -12    1.51    2.47
  -5   0 -12    1.32    1.97
   5   1 -15    7.68    3.55
   5   1 -14    7.30    5.38
   5  -1 -13    0.95    1.86
   5   1 -13    1.43    3.40
   5  -1 -12    6.06    5.50
   5   1 -12    9.46    8.48
   5  -1 -11    1.40    4.26
   5   1 -11    2.50    4.75
   5  -1 -10   15.55   19.43
   5   1 -10   11.97   29.74
   5  -1 -10   24.00   11.83
   5   1 -10   28.16   13.51
   5   1 -10   20.74   19.64
   5  -1  -9  104.64   21.64
   5   1  -9  107.21   19.47
   5  -1  -9   89.41   18.62
   5   1  -9  102.80   22.06
   5   1  -9   97.28   75.34
   5   1  -9   83.99   15.24
   5  -1  -8    6.32    5.09
   5  -1  -8    6.32    9.28
   5   1  -8    4.76   14.83
   5  -1  -8    7.06    8.33
   5   1  -8    7.98    8.55
   5   1  -8    7.07    5.62
   5   1  -8    3.76    5.58
   5  -1  -7  229.34   24.96
   5  -1  -7  256.62   30.20
   5   1  -7  258.81   30.07
   5  -1  -7  200.67   26.18
   5   1  -7  207.39   29.30
   5  -1  -7  240.84   29.53
   5   1  -7  237.51   68.01
   5   1  -7  188.56   65.97
   5  -1  -6    3.08    3.39
   5  -1  -6    7.93   12.97
   5   1  -6    6.29    9.03
   5  -1  -6    4.56    5.89
   5   1  -6    5.04    7.29
   5  -1  -6    6.25    7.22
   5   1  -6    6.44    4.43
   5   1  -6    4.99    3.85
   5  -1  -5  204.13   19.32
   5  -1  -5  226.41   24.46
   5   1  -5  222.45   21.70
   5  -1  -5  159.91   20.37
   5   1  -5  174.74   22.54
   5  -1  -5  195.86   23.68
   5   1  -5  200.71   22.68
   5   1  -5  166.83   20.28
   5  -1  -4  145.30   15.81
   5  -1  -4  154.07   19.18
   5   1  -4  144.72   16.81
   5  -1  -4  112.50   17.62
   5   1  -4  116.22   20.33
   5  -1  -4  170.92   73.03
   5   1  -4  142.96   21.71
   5   1  -4  125.97   51.01
   5  -1  -3  356.39   25.66
   5  -1  -3  374.80   29.39
   5   1  -3  359.63   34.16
   5  -1  -3  286.12   26.49
   5   1  -3  290.26   27.61
   5  -1  -3  345.57   35.49
   5   1  -3  379.89   49.95
   5  -1  -2  342.42   24.98
   5  -1  -2  335.03   26.44
   5   1  -2  328.49   22.82
   5  -1  -2  265.09   25.78
   5   1  -2  295.95   27.44
   5  -1  -2  337.97   29.48
   5  -1  -1  293.71   22.93
   5  -1  -1  305.18   29.13
   5  -1  -1  236.63   24.96
   5   1  -1  258.64   25.76
   5   1  -1  307.32   32.68
   5  -1   0 1147.22   50.80
   5  -1   0  907.85   49.81
   5   1   0  988.53   47.67
   5   1   0 1219.53   50.12
   5  -1   1  348.90   25.83
   5  -1   1  284.56   27.53
   5   1   1  325.28   29.47
   5   1   1  393.46   29.45
   5  -1   2  119.72   15.29
   5  -1   2   97.28   16.49
   5   1   2  102.84   17.05
   5   1   2  110.80   34.77
   5  -1   3  103.03   15.11
   5  -1   3   83.18   16.24
   5  -1   4   91.21   14.27
   5  -1   4   84.23   23.43
   5   1   4   91.66   16.38
   5  -1   5  365.01   33.99
   5  -1   5  353.99   37.64
   5   1   5  381.51   44.32
   5  -1   6  245.53   27.85
   5  -1   6  239.00   31.03
   5   1   6  267.29   32.75
   5  -1   7  270.91   34.19
   5  -1   7  313.49   38.36
   5   1   7  306.87   34.78
   5  -1   8    3.65    5.76
   5   1   8    4.86    6.00
   5  -1   9   24.98   29.50
   5   1   9   17.55   22.42
   5  -1  10   15.99   17.09
   5   1  10    9.90    9.93
   5   1  11    2.76    3.77
   5  -1  11    4.89    5.31
  -5  -1 -12   13.74    5.39
  -5   1 -12   16.85    6.67
  -5   1 -12   12.86    4.89
   5   2 -15    3.71    2.86
   5   2 -14    8.72    5.34
   5   2 -13   23.53    8.95
   5   2 -12    1.72    4.11
   5  -2 -11   28.25    7.78
   5   2 -11   38.37   13.27
   5   2 -11   19.08   28.77
   5  -2 -10   20.62    9.65
   5   2 -10   31.05   11.95
   5   2 -10   17.96   19.29
   5   2 -10   26.12   22.45
   5  -2  -9  185.35   23.11
   5  -2  -9  211.39   26.40
   5   2  -9  199.19   24.06
   5  -2  -9  182.40   26.28
   5   2  -9  201.59   30.71
   5   2  -9  219.68   68.90
   5   2  -9  187.98   51.12
   5  -2  -8   83.80   15.36
   5  -2  -8   71.90   65.36
   5   2  -8   85.28   15.47
   5  -2  -8   79.80   15.75
   5   2  -8   75.61   18.30
   5   2  -8   91.60   42.95
   5   2  -8   77.54   23.27
   5  -2  -7   88.28   15.81
   5  -2  -7   78.46   56.10
   5   2  -7   90.66   15.63
   5  -2  -7   70.69   15.22
   5   2  -7   84.59   17.15
   5   2  -7  102.08   57.66
   5   2  -7   80.17   61.07
   5  -2  -6  208.13   22.12
   5  -2  -6  214.04   37.99
   5   2  -6  188.48   19.60
   5  -2  -6  161.13   19.95
   5   2  -6  172.16   22.20
   5   2  -6  194.03   32.26
   5   2  -6  178.31   54.98
   5  -2  -5    3.83    4.21
   5  -2  -5    5.46    7.16
   5   2  -5    2.50    5.35
   5  -2  -5    1.96    5.20
   5   2  -5    3.63    5.62
   5   2  -5    4.66    4.04
   5   2  -5    3.64    2.84
   5  -2  -4  401.76   30.42
   5  -2  -4  398.51   34.24
   5  -2  -4  300.57   26.48
   5   2  -4  327.10   28.97
   5   2  -4  353.83   32.05
   5   2  -4  322.15   28.30
   5  -2  -3  144.25   17.88
   5  -2  -3  140.92   36.81
   5  -2  -3  116.24   17.28
   5   2  -3  167.86   21.64
   5   2  -3  133.27   17.65
   5  -2  -2  192.90   20.26
   5  -2  -2  206.63   22.55
   5  -2  -2  152.63   18.69
   5   2  -2  165.86   20.09
   5   2  -2  215.04   25.42
   5  -2  -1  115.75   15.85
   5  -2  -1   96.74   15.76
   5   2  -1  101.88   15.69
   5  -2   0  756.50   38.88
   5  -2   0  596.96   36.68
   5   2   0  650.85   37.90
   5   2   0  774.72   40.01
   5  -2   1  485.74   32.01
   5  -2   1  372.77   29.90
   5   2   1  422.23   31.35
   5   2   1  516.84   32.59
   5  -2   2 1084.69   47.81
   5  -2   2  937.03   47.63
   5   2   2 1063.47   44.17
   5  -2   3  230.59   23.46
   5  -2   3  205.73   42.42
   5   2   3  235.20   24.28
  -5   2  -3  184.15   21.14
   5  -2   4   27.84    9.48
   5  -2   4   29.59   22.13
   5   2   4   31.78   11.16
  -5   2  -4   23.99   10.08
  -5   2  -4   20.77    9.25
   5  -2   5  425.13   39.86
   5  -2   5  382.89   39.64
  -5   2  -5  293.47   30.58
   5  -2   6  361.45   35.23
   5  -2   6  340.34   38.18
   5   2   6  381.42   37.61
   5  -2   7  151.83   23.49
   5  -2   7  166.02   28.56
   5   2   7  168.87   26.54
   5  -2   8  110.76   47.09
   5   2   8   93.84   18.96
   5  -2   9   38.10   34.21
   5   2   9   30.91   34.40
   5  -2  10   38.14   43.71
   5   2  10    0.29    2.42
  -5  -2 -11    2.67    2.72
  -5   2 -11    1.76    6.36
  -5   2 -12    3.80    5.69
  -5   2 -12    3.53    2.99
   5   3 -14    8.56    4.63
   5   3 -13    7.04    5.82
   5   3 -12    8.38    7.14
   5   3 -12    2.46    6.81
   5   3 -11   41.90   15.05
   5   3 -11   16.85   32.51
   5   3 -11   26.47   30.28
   5   3 -10    4.23    6.81
   5   3 -10    1.94    5.02
   5   3 -10    3.26   11.76
   5  -3  -9   20.02    9.64
   5  -3  -9    8.60   14.11
   5   3  -9    3.53    6.22
   5   3  -9   21.15   10.44
   5   3  -9   21.22   11.44
   5   3  -9   19.35   13.40
   5  -3  -8   15.69    8.77
   5  -3  -8   12.11   11.14
   5   3  -8   15.95    7.49
   5   3  -8   14.74    7.82
   5   3  -8   13.09    7.13
   5  -3  -7   55.60   13.93
   5  -3  -7   37.78   29.74
   5   3  -7   42.70   14.03
   5   3  -7   59.33   28.81
   5   3  -7   45.73   27.25
   5  -3  -6  207.79   25.96
   5  -3  -6  205.22   25.93
   5   3  -6  181.41   24.86
   5   3  -6  219.60   81.96
   5   3  -6  174.87   47.49
   5  -3  -5  100.32   17.71
   5  -3  -5   86.91   28.07
   5  -3  -5   66.65   13.54
   5   3  -5   81.86   15.63
   5   3  -5  109.06   44.47
   5   3  -5   90.84   58.92
   5  -3  -4  171.47   20.18
   5  -3  -4  175.91   30.27
   5  -3  -4  126.49   16.87
   5   3  -4  149.18   21.16
   5   3  -4  190.27   26.78
   5   3  -4  147.72   22.76
   5  -3  -3  220.69   23.05
   5  -3  -3  216.87   34.66
   5  -3  -3  159.11   18.53
   5   3  -3  236.81   26.67
   5   3  -3  197.16   23.30
   5  -3  -2  413.08   32.21
   5  -3  -2  312.60   25.32
   5   3  -2  367.17   28.79
   5   3  -2  443.72   34.65
   5   3  -2  375.93   34.48
   5  -3  -1    1.43    5.58
   5  -3  -1    1.68    4.79
   5   3  -1    0.67    3.01
   5   3  -1    1.28    4.40
   5  -3   0  244.14   24.61
   5  -3   0  196.20   21.25
   5   3   0  214.61   22.67
   5   3   0  259.36   31.49
   5  -3   1  760.01   43.08
   5  -3   1  629.98   49.37
   5   3   1  689.74   53.13
   5   3   1  802.35   46.53
   5  -3   2  431.90   32.83
   5  -3   2  341.62   28.76
   5   3   2  379.89   29.56
   5   3   2  432.56   30.89
  -5   3  -2  359.55   30.81
   5  -3   3    1.66    7.24
   5  -3   3    1.83    5.28
   5   3   3    3.57    4.71
  -5   3  -3    1.13    9.39
  -5   3  -3    0.84    8.25
   5  -3   4   65.74   15.29
   5  -3   4   66.59   36.43
   5   3   4   55.73   13.52
  -5   3  -4   52.83   12.98
  -5   3  -4   48.97   13.26
   5  -3   5   44.65   12.39
   5  -3   5   44.88   32.77
   5   3   5   46.19   34.79
  -5   3  -5   40.31   11.21
  -5   3  -5   35.73   11.86
   5  -3   6  278.51   37.49
   5  -3   6  276.76   75.11
   5   3   6  266.99   35.70
  -5   3  -6  224.62   32.31
   5  -3   7  291.63   33.68
   5   3   7  295.36   33.32
  -5   3  -7  218.35   71.75
   5  -3   8  275.85   57.90
   5   3   8    0.29    1.51
   5  -3   9   84.37   17.94
   5   3   9    0.30    1.61
   5  -3  10   21.03    8.39
  -5   3 -11    1.79    4.62
  -5   3 -11    2.09    3.08
  -5   3 -12    4.72    3.86
  -5   3 -12    6.72    3.75
   5   4 -14   14.98    6.44
   5   4 -13   11.99    6.16
   5   4 -13    1.55    4.17
   5   4 -12   11.26    7.26
   5   4 -12    5.43   15.31
   5   4 -11    1.63    3.92
   5   4 -11    0.37    2.24
   5   4 -11    1.35    4.44
   5   4 -10   45.84   13.90
   5   4 -10   51.24   29.30
   5   4 -10   49.74   35.54
   5   4  -9  179.41   23.82
   5   4  -9  189.95   24.12
   5   4  -9  174.47   23.93
   5   4  -8  102.22   85.60
   5   4  -8   91.23   61.39
   5  -4  -7  202.81   25.87
   5  -4  -7  201.69   30.62
   5   4  -7  218.54   27.83
   5   4  -7  243.77  113.30
  -5   4   7  233.44   26.17
   5   4  -7  202.44   66.14
   5  -4  -6  360.83   36.73
   5  -4  -6  350.23   36.04
   5   4  -6  343.72   36.00
   5   4  -6  406.15   44.03
  -5   4   6  389.54   39.35
   5   4  -6  353.08   40.12
   5  -4  -5    1.37    4.92
   5  -4  -5    5.24    5.91
   5   4  -5    3.83    5.87
   5   4  -5   16.01   10.28
   5   4  -5    1.98    8.23
   5  -4  -4  106.66   18.48
   5  -4  -4  108.50   19.98
   5   4  -4  103.60   17.67
   5   4  -4  144.40   70.17
  -5   4   4  115.86   20.14
   5   4  -4  100.16   50.14
   5  -4  -3  166.80   23.41
   5   4  -3  155.69   21.28
   5   4  -3  148.17   28.52
   5  -4  -2   71.47   17.27
   5   4  -2   64.07   13.27
   5   4  -2  138.04   41.83
  -5   4   2   75.81   16.39
   5   4  -2   87.42   56.92
   5  -4  -1  227.69   28.01
   5   4  -1  210.02   24.83
   5   4  -1  261.92   30.71
  -5   4   1  205.91   30.28
   5  -4   0  320.29   33.48
   5   4   0  294.63   29.43
   5   4   0  364.07   35.92
  -5   4   0  301.88   34.51
   5  -4   1  151.54   21.98
   5  -4   1  104.93   48.96
   5   4   1  144.66   19.46
   5   4   1  181.92   22.72
  -5   4  -1  143.98   23.73
   5  -4   2   93.44   17.59
   5  -4   2   72.55   19.19
   5   4   2   85.70   14.42
   5   4   2   71.13   56.22
  -5   4  -2   81.97   17.73
   5  -4   3   46.15   13.01
   5  -4   3   39.89   28.89
   5   4   3   40.45    9.95
  -5   4  -3   44.36   12.44
  -5   4  -3   41.50   14.19
   5  -4   4    1.60    3.56
   5  -4   4    3.17    7.56
   5   4   4    1.60    5.32
  -5   4  -4    1.21    8.36
  -5   4  -4    0.72    5.96
   5  -4   5   12.69    7.36
   5  -4   5   11.62   10.32
   5   4   5   10.00   12.31
  -5   4  -5   11.27    7.91
  -5   4  -5   13.70   11.21
   5  -4   6   65.18   32.64
  -5   4  -6   59.47   12.65
   5  -4   7    0.91    4.47
  -5   4  -7    3.32    3.80
   5  -4   8  184.81   21.41
  -5   4  -8  143.48   17.39
   5  -4   9   16.80    6.31
  -5   4  -9    7.46   11.84
  -5   4 -10   49.37   10.29
  -5   4 -11    2.16    3.04
  -5   4 -11    6.31    4.24
   5   5 -13    1.46    2.97
   5   5 -12    2.32    3.54
   5   5 -12    0.98    3.53
   5   5 -11   14.80    7.05
   5   5 -11    6.96    9.26
   5   5 -11    8.42   11.68
   5   5 -10   19.65    8.79
   5   5 -10   24.39   15.36
   5   5 -10   15.19   22.55
   5   5  -9   33.37   10.87
   5   5  -9   48.60   35.25
   5   5  -9   35.43   24.73
   5   5  -8  144.62   19.91
   5   5  -8  163.42   50.80
   5   5  -8  153.30   24.45
   5   5  -7  144.10   19.98
   5   5  -7  198.94   27.35
  -5   5   7  142.71   17.98
   5   5  -7  166.82   23.97
   5  -5  -6  175.46   26.84
   5   5  -6  219.00   61.90
  -5   5   6  200.11   28.84
   5   5  -6  171.56   28.61
   5  -5  -5  103.65   19.83
   5   5  -5   98.61   17.82
   5   5  -5  132.61   73.89
  -5   5   5  107.43   20.06
   5   5  -5  103.10   20.84
   5  -5  -4   58.10   14.05
   5   5  -4   55.75   11.93
   5   5  -4   82.73   35.85
   5   5  -4   63.68   49.59
   5  -5  -3   65.11   14.78
   5   5  -3   57.45   11.90
   5   5  -3   82.09   40.31
  -5   5   3   66.80   16.98
   5   5  -3   66.93   52.79
   5  -5  -2  369.16   37.64
   5   5  -2  343.44   33.33
  -5   5   2  345.65   38.61
   5   5  -2  365.37   40.29
   5  -5  -1  108.38   18.98
   5   5  -1  118.32   22.49
  -5   5   1   95.88   22.42
   5  -5   0  465.94   43.82
   5   5   0  539.70   48.83
  -5   5   0  418.29   42.70
   5  -5   1   47.12   12.46
   5   5   1   44.62   27.43
  -5   5  -1   54.54   15.27
   5  -5   2   85.61   16.78
  -5   5  -2   83.79   18.59
  -5   5  -2   69.97   16.38
   5  -5   3   63.54   14.88
  -5   5  -3   73.75   17.79
  -5   5  -3   60.41   16.67
  -5   5  -4   -6.41   10.35
  -5   5  -4   -2.77    8.91
  -5   5  -5  103.93   16.37
  -5   5  -5   98.09   17.12
   5  -5   6  167.71   28.80
  -5   5  -6  186.55   31.00
  -5   5  -6  173.79   75.14
   5  -5   7  339.73   24.99
  -5   5  -7  366.98   29.37
  -5   5  -8    1.06    3.12
  -5   5  -9    0.27    1.59
  -5   5 -10    3.25    3.22
   5   6 -12    0.56    1.80
   5   6 -11    0.56    1.14
   5   6 -11    0.30    1.19
   5   6 -11    0.78    2.42
   5   6 -10    0.19    1.03
   5   6 -10   27.83   32.15
   5   6 -10   42.01    9.92
   5   6  -9    0.50    1.60
   5   6  -9   18.63   18.49
   5   6  -9   14.72   23.35
   5   6  -8    0.99    2.33
   5   6  -8    9.26    7.87
   5   6  -8    2.70    6.60
   5   6  -7    0.65    1.74
   5   6  -7   87.61   57.17
  -5   6   7    0.38    1.91
   5   6  -7   57.69   50.44
   5   6  -6    0.41    1.42
   5   6  -6  115.59   68.43
  -5   6   6   92.97   18.98
   5   6  -6   96.80   21.59
   5   6  -5  135.31   23.88
  -5   6   5  109.69   17.56
   5   6  -5  114.67   33.51
   5   6  -4    5.17    6.11
  -5   6   4    1.57    8.80
   5   6  -4    2.99    4.32
   5   6  -3  385.26   39.89
  -5   6   3  336.85   31.87
   5   6  -3  285.30   28.57
   5   6  -2   17.59   12.60
  -5   6   2   11.29    8.65
   5   6  -1  165.28   50.80
  -5   6   1  168.43   28.24
   5   6   0  213.24   28.97
  -5   6   0  152.48   27.60
   5   6   1    0.37    1.29
  -5   6  -2    3.15    5.12
  -5   6  -2    4.37    5.08
  -5   6  -3   32.97   10.62
  -5   6  -3   33.15   12.71
  -5   6  -4   46.48   12.89
  -5   6  -4   41.11   13.71
  -5   6  -5   25.20    7.88
  -5   6  -5    0.80    1.80
  -5   6  -5   22.68    9.28
  -5   6  -6    0.51    1.67
  -5   6  -7    0.60    1.28
  -5   6  -8    0.68    1.42
  -5   6  -8    1.13    2.80
  -5   6  -9    0.16    0.73
  -5   6  -9    0.84    4.79
   5   7 -10    1.27    5.17
   5   7  -9   41.89   22.07
   5   7  -9   39.62    9.00
   5   7  -8    4.27    4.62
   5   7  -8    3.38    4.95
   5   7  -7   19.50   14.13
   5   7  -7    7.30   10.80
   5   7  -6    5.57    5.48
  -5   7   6    0.66    1.75
   5   7  -6    2.00    9.28
   5   7  -5   42.71   25.05
   5   7  -5   25.48   29.47
   5   7  -4   60.66   46.07
  -5   7   4   45.08   12.97
   5   7  -4   36.80   35.37
   5   7  -3   10.09    9.26
  -5   7   3    9.94    9.68
   5   7  -2   89.20   58.26
  -5   7   2   82.30   20.52
   5   7  -1  202.56   37.58
  -5   7   1  190.12   34.55
  -5   7   1  168.74   31.11
   5   7   0    0.96    2.17
  -5   7   0  120.81   25.41
  -5   7   0  101.39   23.34
  -5   7  -1   10.25    8.87
  -5   7  -1    6.77    9.69
  -5   7  -2    0.90    4.54
  -5   7  -2    2.26    5.10
  -5   7  -3   62.07   13.59
  -5   7  -3   53.33   12.50
  -5   7  -4   10.45    5.55
  -5   7  -4   11.33    7.04
  -5   7  -5   89.16   14.02
  -5   7  -5   75.63   13.76
  -5   7  -6    1.33    5.22
  -5   7  -6    8.93    8.68
  -5   7  -7   55.05   10.20
  -5   7  -8    4.65   13.48
   5   8  -8    1.39    3.69
   5   8  -8    0.43    1.06
   5   8  -7    7.96    7.12
   5   8  -7    0.01    0.76
  -5   8   7    0.49    1.43
   5   8  -6   59.51   32.28
  -5   8   6    0.40    1.47
   5   8  -5    2.96    6.23
  -5   8   5    0.37    1.43
  -5   8   5    1.21    2.26
   5   8  -4    5.92    6.18
  -5   8   4    0.60    2.18
  -5   8   4    3.30    4.11
   5   8  -3    1.26    4.00
  -5   8   3    2.75    3.79
  -5   8   3    1.01    5.16
   5   8  -2    0.74    2.86
  -5   8   2   42.34   10.41
   5   8  -1    0.49    1.58
  -5   8   1   32.81   10.45
  -5   8   1   30.96    8.96
  -5   8   0    4.92    8.06
  -5   8   0    2.04    5.00
  -5   8  -1   22.45    8.82
  -5   8  -1   25.74    9.61
  -5   8  -2   15.52    7.08
  -5   8  -2   12.74    6.55
  -5   8  -3   16.43    6.82
  -5   8  -3   13.67    7.19
  -5   8  -4   10.58    4.99
  -5   8  -4    9.44   16.68
  -5   8  -5    9.18    3.83
  -5   8  -5   22.97   16.49
  -5   8  -6   10.56   19.74
   5   9  -5    1.10    3.30
   5   9  -3    0.20    1.44
  -5   9   3    0.35    1.65
  -5   9   3    0.76    1.97
   5   9  -2    0.23    0.93
  -5   9   2   16.36    5.92
  -5   9   2    1.10    2.09
  -5   9   1    5.07    6.34
  -5   9   1    8.29    4.80
  -5   9   0    9.31    4.82
  -5   9   0    8.05    5.27
  -5   9  -1    4.67    4.13
  -5   9  -1    2.01    3.85
  -5   9  -2   41.93    8.99
  -5   9  -2   22.00    6.31
   6   0 -13    4.71    3.08
   6   0 -12   85.33   13.88
   6   0 -11   20.50    7.38
   6   0 -10    2.08    5.05
   6   0  -9   65.21   15.10
   6   0  -8   71.75   19.78
   6   0  -8   79.88   56.56
   6   0  -7    0.98    4.74
   6   0  -7    2.23    5.74
   6   0  -7    1.24    2.20
   6   0  -6   99.54   16.05
   6   0  -6  112.87   21.87
   6   0  -6  134.51   50.49
   6   0  -5   24.15   32.16
   6   0  -5   41.44   15.60
   6   0  -5   48.43   35.22
   6   0  -4    0.49    1.22
   6   0  -4    1.81    8.73
   6   0  -4    2.39    3.38
   6   0  -3   56.04   25.59
   6   0  -3   67.32   16.16
   6   0  -3  108.36   53.66
   6   0  -2    5.12    9.07
   6   0  -2    5.16    8.64
   6   0  -1    0.35    9.05
   6   0  -1   -0.60    4.60
   6   0   0  164.93   25.13
   6   0   1  174.52   26.59
   6   0   2  183.52   30.87
   6   0   3   14.79   13.10
   6   0   4  181.31   31.06
   6   0   5   11.46   10.98
   6   0   6   17.25   21.05
   6   0   7  350.34   45.88
   6   0   8    7.42   12.04
   6   0   9   43.62   24.78
   6   0  10   71.68   22.70
  -6   0 -11    0.47    1.85
   6   1 -14    4.64    2.84
   6   1 -13   23.04    7.12
   6  -1 -12    4.68    2.94
   6   1 -12   10.35    5.71
   6  -1 -11   11.91    5.84
   6   1 -11    8.84    5.39
   6  -1 -10    6.16    5.88
   6   1 -10    5.14    6.50
   6   1 -10    3.21    5.85
   6  -1  -9   59.06   12.56
   6   1  -9   72.28   16.41
   6   1  -9   61.13   37.41
   6  -1  -8   31.83   11.91
   6   1  -8   42.55   14.19
   6   1  -8   53.03   26.86
   6  -1  -7   15.03   22.18
   6   1  -7    9.35   24.99
   6  -1  -7   27.80   12.64
   6   1  -7   33.55   12.65
   6   1  -7   35.93   17.03
   6  -1  -6   77.13   15.49
   6  -1  -6   73.02   15.96
   6   1  -6   76.05   18.11
   6   1  -6   92.10   38.29
   6  -1  -5    0.34    1.95
   6  -1  -5    1.95    8.18
   6   1  -5    0.30    8.22
   6   1  -5   -2.03    8.31
   6  -1  -4   24.99   32.82
   6  -1  -4   34.13   11.45
   6   1  -4   42.86   13.99
   6   1  -4   50.04   29.30
   6  -1  -3    5.39    8.02
   6   1  -3   13.54   14.07
   6   1  -3    1.64    5.80
   6  -1  -2   40.08   11.89
   6   1  -2   31.55   14.56
   6   1  -2   62.94   32.56
   6  -1  -1  690.97   56.97
   6   1  -1  770.57   61.87
   6  -1   0   38.36   13.35
   6   1   0   41.66   12.63
   6   1   0   61.26   28.52
   6  -1   1  133.85   23.65
   6   1   1  124.82   20.65
   6   1   1  147.52   20.54
   6  -1   2  518.74   48.97
   6   1   2  573.78   51.62
   6  -1   3  451.42   78.47
   6   1   3  495.34   45.09
   6  -1   4   90.56   25.77
   6  -1   5   37.44   37.30
   6   1   5   48.36   39.57
   6  -1   6  334.38   33.56
   6   1   6  320.86   45.00
   6  -1   7   23.61   33.07
   6   1   7   30.48   32.12
   6  -1   8  115.77   17.63
   6   1   8  107.95   19.97
   6  -1   9    9.19   11.89
   6   1   9    9.31   12.83
   6  -1  10    0.85    2.20
   6   1  10    0.88    4.32
  -6   1 -11   14.48    5.39
  -6   1 -11   12.46    4.74
   6   2 -13    5.25    3.86
   6   2 -12    7.68    5.38
   6   2 -11    1.05    4.07
   6   2 -11    0.18    0.45
   6  -2 -10    8.24    4.13
   6   2 -10   16.41    8.35
   6   2 -10    9.51    9.65
   6  -2  -9   58.49   13.40
   6   2  -9   66.58   17.62
   6   2  -9   57.40   52.58
   6  -2  -8   28.59    8.27
   6   2  -8   26.28   10.55
   6   2  -8   40.55   19.82
   6  -2  -7   48.92   12.97
   6  -2  -7   52.68   15.62
   6   2  -7   59.90   15.43
   6   2  -7   70.12   30.59
   6  -2  -6   72.14   14.67
   6  -2  -6   68.72   16.18
   6   2  -6   80.58   17.85
   6   2  -6   92.55   50.61
   6  -2  -5    0.58    1.93
   6  -2  -5    1.47    6.43
   6   2  -5    3.32    5.62
   6   2  -5    2.29    5.12
   6  -2  -4  186.16   23.26
   6  -2  -4  189.89   26.85
   6  -2  -4  173.23   24.03
   6   2  -4  198.61   27.05
   6   2  -4  256.52   37.08
   6  -2  -3   62.18   12.90
   6  -2  -3   65.05   31.91
   6  -2  -3   56.45   13.22
   6   2  -3   69.88   16.05
   6   2  -3   94.46   46.91
   6  -2  -2  188.18   22.90
   6  -2  -2  164.97   23.41
   6   2  -2  228.01   54.09
   6  -2  -1   27.52    9.51
   6  -2  -1   29.56   12.44
   6   2  -1   27.16   10.19
   6   2  -1   41.06   34.03
   6  -2   0  272.22   28.56
   6  -2   0  255.28   31.64
   6   2   0  283.88   33.16
   6   2   0  336.57   35.32
   6  -2   1  491.50   42.77
   6  -2   1  475.23   45.46
   6   2   1  548.08   50.61
   6   2   1  574.48   49.88
   6  -2   2  153.06   20.28
   6  -2   2  161.56   24.46
   6   2   2  183.01   25.80
   6   2   2  134.80   19.22
  -6   2  -2  117.84   18.33
   6  -2   3  144.34   20.00
   6  -2   3  158.56   51.32
  -6   2  -3  162.18   23.50
   6  -2   4   49.35   11.82
   6  -2   4   77.24   58.57
   6   2   4   71.92   31.12
  -6   2  -4   65.19   17.26
   6  -2   5    9.16    7.83
   6   2   5    1.93   10.91
   6  -2   6   33.34   21.14
   6   2   6   21.62   31.89
   6  -2   7   22.16   19.41
   6   2   7   21.55   25.44
   6  -2   8   16.49   20.19
   6   2   8    9.74   12.97
   6  -2   9   19.28   31.96
   6   2   9    0.30    1.61
   6  -2  10   26.61    8.64
   6   2  10   -0.01    0.52
   6   3 -13   13.93    6.35
   6   3 -12   15.27    7.02
   6   3 -11    3.39    5.89
   6   3 -11    1.05    2.13
   6   3 -10    3.21    5.85
   6   3 -10    3.41    8.09
   6   3 -10    1.09    1.46
   6   3  -9   31.34   12.48
   6   3  -9   30.62   32.70
  -6   3   9    1.06    2.32
   6   3  -9   21.70   20.95
   6   3  -8   55.86   15.08
   6   3  -8   56.75   46.18
   6   3  -8   54.63   11.76
   6   3  -7   94.68   18.64
   6   3  -7  104.53   68.43
   6   3  -7   75.92   36.48
   6  -3  -6  215.99   28.87
   6  -3  -6  217.67   36.16
   6   3  -6  289.39   39.58
   6   3  -6  309.25  113.50
   6   3  -6  255.21  103.01
   6  -3  -5  243.58   31.35
   6  -3  -5  243.54   34.14
   6  -3  -5  225.31   29.90
   6   3  -5  287.07   38.35
   6   3  -5  267.86   43.49
   6  -3  -4  513.14   43.27
   6  -3  -4  434.44   38.34
   6   3  -4  543.21   49.91
   6   3  -4  685.04   65.12
   6  -3  -3   46.54   11.75
   6  -3  -3   44.61   12.61
   6   3  -3   64.88   15.53
   6   3  -3   88.01   64.68
   6  -3  -2   45.59   11.14
   6  -3  -2   39.92   12.86
   6   3  -2   52.36   33.41
   6  -3  -1  113.75   17.66
   6  -3  -1  102.70   63.85
   6   3  -1  128.68   20.62
   6   3  -1  152.99   73.64
   6  -3   0  329.76   32.58
   6  -3   0  323.74   33.74
   6   3   0  372.97   37.27
   6   3   0  439.35   41.34
   6  -3   1    9.39    5.86
   6  -3   1   14.81   10.70
   6   3   1   13.15    7.16
   6   3   1   13.46    7.92
  -6   3  -1   14.57   10.07
   6  -3   2  372.19   43.35
   6  -3   2  364.37   44.99
   6   3   2  410.94   47.73
   6   3   2  359.99   40.27
  -6   3  -2  394.47   48.61
  -6   3  -2  313.44   39.48
   6  -3   3  131.52   45.60
   6   3   3  137.40   23.06
  -6   3  -3  136.05   24.17
  -6   3  -3  113.89   22.47
   6  -3   4   70.21   29.92
   6   3   4   66.68   14.53
  -6   3  -4   71.15   13.04
  -6   3  -4   57.53   11.35
   6  -3   5   59.70   39.70
   6   3   5   47.94   20.83
  -6   3  -5   37.10    9.96
   6  -3   6   55.83   48.66
   6   3   6    0.20    2.48
   6  -3   7   34.65   39.06
   6   3   7    0.45    1.25
   6  -3   8   71.73   16.61
   6   3   8    0.41    1.32
   6  -3   9    4.72    9.71
  -6   3 -10    7.32    4.81
  -6   3 -10    7.95    5.52
   6   4 -12   14.49    5.72
   6   4 -11   20.56    7.83
   6   4 -11    7.06   16.02
   6   4 -10    8.92    6.27
   6   4 -10    5.46   12.83
   6   4 -10    0.69    2.17
   6   4  -9   13.10    7.68
   6   4  -9    9.20   11.18
   6   4  -9    8.21   13.44
   6   4  -8   23.94   16.74
   6   4  -8   27.79   24.31
  -6   4   8    1.53    2.80
   6   4  -8   20.64   20.01
   6   4  -7   93.82   20.66
   6   4  -7  102.41   66.70
  -6   4   7  118.42   23.31
   6   4  -7   90.88   67.55
   6   4  -6   51.61   13.56
   6   4  -6   63.05   50.79
  -6   4   6   48.55   12.27
   6   4  -6   50.88   33.83
   6   4  -5  126.21   19.70
   6   4  -5  142.07   74.83
  -6   4   5  127.49   19.63
   6   4  -4   34.20   10.53
   6   4  -4   54.33   32.28
  -6   4   4   35.98   13.00
   6  -4  -3   56.02   13.85
   6   4  -3   52.90   12.94
   6   4  -3   84.27   57.98
  -6   4   3   68.60   16.39
   6  -4  -2   20.50    9.04
   6   4  -2   18.38    7.97
   6   4  -2   26.82   14.16
  -6   4   2   16.63   11.09
   6  -4  -1    9.27    6.75
   6   4  -1   13.48    7.03
   6   4  -1   17.53   12.96
  -6   4   1   13.55    8.60
   6  -4   0  114.74   20.07
   6  -4   0   66.52   65.71
   6   4   0  122.75   20.71
   6   4   0  146.79   24.09
  -6   4   0  111.26   24.35
   6  -4   1   77.65   16.36
   6   4   1   97.40   17.50
   6   4   1   80.53   61.15
  -6   4  -1   90.00   20.38
   6  -4   2   44.81   10.23
   6   4   2   33.68    9.31
  -6   4  -2   35.55   10.41
  -6   4  -2   30.69    9.77
   6  -4   3   23.91   15.51
   6   4   3    0.32    1.91
  -6   4  -3   26.67    9.77
  -6   4  -3   23.79    8.79
   6  -4   4   13.24   17.66
   6   4   4    0.77    3.04
  -6   4  -4   17.22   12.01
  -6   4  -4   18.14   12.99
   6  -4   5    8.38   15.62
   6   4   5    0.28    1.95
  -6   4  -5   11.36    8.08
  -6   4  -5    9.97    7.65
   6  -4   6    8.56    9.08
  -6   4  -6    4.10    8.93
   6  -4   7   73.52   15.95
   6  -4   8  151.11   15.57
  -6   4  -9    0.17    1.35
   6   5 -11    0.47    1.63
   6   5 -11    0.18    0.49
   6   5 -10   10.43    4.69
   6   5 -10   12.06   18.84
   6   5 -10    0.13    4.40
   6   5  -9    4.93    4.53
   6   5  -9    4.31    5.51
   6   5  -9    0.99    2.22
   6   5  -8   12.72    5.93
   6   5  -8   12.13   11.10
   6   5  -8   10.81   15.47
   6   5  -7   15.96    6.41
   6   5  -7   24.63   18.16
  -6   5   7    0.83    1.81
   6   5  -7   18.45   21.89
   6   5  -6  218.95   36.50
   6   5  -6  306.41   50.22
  -6   5   6  254.72   41.55
   6   5  -6  212.06   39.84
   6   5  -5   12.24    9.13
   6   5  -5   19.36   21.52
  -6   5   5   18.60   14.16
   6   5  -4  171.59   29.57
   6   5  -4  247.69   42.68
  -6   5   4  198.04   35.02
   6   5  -3    0.73    1.94
   6   5  -3   12.65   12.03
  -6   5   3    5.21    5.57
   6   5  -2    0.39    1.38
   6   5  -2   83.91   71.45
  -6   5   2   84.36   18.55
   6   5  -1    0.29    1.72
   6   5   0    0.70    1.99
   6   5   0    1.76    3.10
  -6   5   0    4.89    7.73
   6   5   1    0.19    1.48
  -6   5  -1   53.05   15.12
  -6   5  -1   45.29   13.55
  -6   5  -2  144.17   27.37
  -6   5  -2  116.74   23.61
  -6   5  -3   68.09   16.06
  -6   5  -3   56.97   14.99
  -6   5  -4   15.42    6.10
  -6   5  -4   14.52    6.47
  -6   5  -5   16.58   11.70
  -6   5  -6   17.67   14.39
  -6   5  -7    0.57    1.34
  -6   5  -8    0.63    1.55
   6   6 -10    0.53    2.01
   6   6  -9    9.89   17.85
   6   6  -8    2.60    5.51
   6   6  -7    7.23   12.27
  -6   6   7    1.06    2.14
   6   6  -6   41.67   48.29
  -6   6   6    0.76    1.66
   6   6  -5   78.23   69.09
  -6   6   5   74.80   15.03
   6   6  -4  305.73   42.89
  -6   6   4  282.66   28.84
   6   6  -3   32.38   37.75
  -6   6   3   34.28   10.82
   6   6  -2   33.16   25.56
  -6   6   2   31.39   13.01
   6   6  -1    0.73    2.63
  -6   6   1   70.45   15.29
  -6   6   1   55.38   12.80
   6   6   0    0.37    2.13
  -6   6  -1   63.11   13.36
  -6   6  -1   57.98   14.83
  -6   6  -2  193.87   21.87
  -6   6  -2  178.19   22.16
  -6   6  -3  120.70   16.47
  -6   6  -3  108.02   16.31
  -6   6  -4   19.73    6.97
  -6   6  -4   19.25    7.20
  -6   6  -5   26.28    6.40
  -6   6  -5   35.86    9.77
  -6   6  -6   27.07   24.25
   6   7  -8    0.46    1.68
   6   7  -7    4.24   11.28
   6   7  -6   68.31   13.73
  -6   7   6    1.62    2.35
   6   7  -5   49.26   15.60
  -6   7   5    0.47    1.54
   6   7  -4   18.39   23.00
  -6   7   4   19.85    8.27
   6   7  -3   -0.25    4.24
  -6   7   3    1.87    4.27
  -6   7   3    0.99    4.03
   6   7  -2    1.30    2.54
  -6   7   2   19.13    7.78
  -6   7   2   22.53    9.76
   6   7  -1    0.23    0.81
  -6   7   1   27.09   10.71
  -6   7   1   19.26    8.03
  -6   7   0   35.62   10.53
  -6   7   0   29.82    9.74
  -6   7  -1    2.58    5.75
  -6   7  -1    5.74    5.32
  -6   7  -2   66.33   12.09
  -6   7  -2   60.09   12.06
  -6   7  -3    7.82    4.14
  -6   7  -3    9.75    4.98
  -6   7  -4    3.86    2.63
  -6   7  -4    4.20    5.19
  -6   7  -5    1.60    3.60
  -6   8   4    1.56    2.29
  -6   8   4   20.11    6.59
   6   8  -3    0.37    1.34
  -6   8   3    9.82    5.70
  -6   8   3   11.22    6.14
  -6   8   2   31.18    7.81
  -6   8   2   29.17    7.89
  -6   8   1    3.51    4.10
  -6   8   1    3.35    4.58
  -6   8   0    1.55    2.81
  -6   8   0    2.37    3.87
  -6   8  -1   53.04    9.31
  -6   8  -1   47.67    9.62
  -6   8  -2    2.03    2.85
  -6   8  -2    0.04    1.40
   7   0 -12    0.29    0.70
   7   0 -11    2.63    2.42
   7   0 -10    1.74    2.61
   7   0  -9   12.41    6.18
   7   0  -8    8.18    5.93
   7   0  -7    1.92    3.37
   7   0  -6   12.26    9.96
   7   0  -5   97.30   16.85
   7   0  -4    2.55    4.97
   7   0  -3    0.95    5.09
   7   0  -2   38.92   12.02
   7   0  -1   72.24   15.64
   7   0   0   23.83   10.31
   7   0   1  208.33   24.81
   7   0   2    4.31    6.59
   7   0   3  130.63   25.54
   7   0   4   16.53   24.81
   7   0   5   52.68   48.08
   7   0   6  201.73   45.05
   7   0   7   36.02    9.59
   7   0   8   92.98   13.96
   7   0   9    0.53    1.93
   7   1 -12   45.33    7.92
   7  -1 -11    2.09    1.85
   7   1 -11    2.22    2.43
   7  -1 -10   20.54    6.27
   7   1 -10   25.45    8.06
   7  -1  -9   59.97   10.96
   7   1  -9   22.64    8.65
   7  -1  -8   17.82    6.49
   7   1  -8   23.37    9.40
   7  -1  -7   29.13    9.61
   7   1  -7   38.42   12.83
   7   1  -7   43.41   25.52
   7  -1  -6   10.37    8.16
   7   1  -6   11.94   10.60
   7   1  -6   12.83   14.63
   7  -1  -5   39.56   10.81
   7   1  -5   44.44   13.85
   7   1  -5   52.46   28.11
   7  -1  -4    1.21    3.67
   7   1  -4    0.96    4.53
   7   1  -4    0.89    3.80
   7  -1  -3   45.38   11.89
   7   1  -3   43.71   12.20
   7   1  -3   64.72   26.69
   7  -1  -2  159.90   21.24
   7   1  -2  116.29   19.70
   7   1  -2  203.21   74.02
   7  -1  -1   24.46    9.41
   7   1  -1   27.25   11.73
   7  -1   0  126.53   19.11
   7   1   0  131.53   21.79
   7  -1   1   78.88   15.91
   7   1   1   83.38   17.29
   7  -1   2   31.87   31.73
   7   1   2   33.59   12.36
  -7   1  -2   30.35    9.52
   7  -1   3   37.42   34.81
   7   1   3   35.67   34.08
  -7   1  -3   30.36    8.81
   7  -1   4   30.43   24.05
   7   1   4   31.75   33.52
   7  -1   5   15.67   26.05
   7   1   5    7.90   13.71
   7  -1   6    4.04    5.71
   7   1   6    1.73    5.10
   7  -1   7   15.02   23.32
   7   1   7   13.67   24.49
   7  -1   8    8.85   24.56
   7   1   8    4.96   17.75
   7   2 -12    2.37    2.27
   7   2 -11    1.14    2.73
   7   2 -10    2.74    3.97
   7   2  -9    1.65    3.46
   7   2  -9    1.35    1.81
  -7   2   9    0.41    1.24
   7  -2  -8    3.16    2.64
   7   2  -8    2.25    4.40
   7   2  -8    2.13    2.61
   7  -2  -7    3.73    3.16
   7   2  -7    8.29    6.81
   7   2  -7   11.22    9.59
   7  -2  -6    6.36    5.49
   7   2  -6    9.43   10.27
   7   2  -6    9.94    8.42
   7  -2  -5  235.61   38.30
   7   2  -5  283.94   30.91
   7   2  -5  329.44   35.48
   7  -2  -4  524.41   35.53
   7   2  -4  556.28  322.49
   7   2  -4  673.17  390.05
   7  -2  -3  152.29   20.03
   7   2  -3  154.65   22.95
   7   2  -3  179.71   75.85
   7  -2  -2  214.62   23.62
   7   2  -2  226.75   27.81
   7   2  -2  258.37   28.59
   7  -2  -1  169.46   20.81
   7   2  -1  172.24   23.86
   7   2  -1  194.91   23.84
   7  -2   0    3.48    4.42
   7   2   0    6.17    7.99
   7  -2   1   42.65   15.63
   7   2   1   50.47   16.57
  -7   2  -1   40.14   12.32
   7  -2   2   24.90   21.23
   7   2   2   22.19   15.54
  -7   2  -2   17.73   12.67
   7  -2   3   48.89   29.18
   7   2   3   30.68   32.54
  -7   2  -3   29.35   18.68
   7  -2   4   11.51    8.62
   7   2   4    9.95   10.92
   7  -2   5   92.92   15.55
   7   2   5   90.76   15.39
   7  -2   6   11.18   14.68
   7   2   6    8.93   19.83
   7  -2   7   12.61   18.48
   7   2   7    0.61    2.40
   7  -2   8    8.13   22.43
   7   2   8    0.24    1.18
   7   3 -11    3.26    3.54
   7   3 -10   26.48    8.38
   7   3 -10   13.75    7.73
   7   3  -9   10.55   13.88
  -7   3   9    0.85    1.62
   7   3  -8   24.47    8.62
   7   3  -8   21.80   24.49
  -7   3   8    0.18    1.18
   7   3  -7   14.44    8.10
   7   3  -7   14.39   17.46
  -7   3   7   16.06    7.79
   7   3  -6   52.31   12.73
   7   3  -6   54.08   35.70
  -7   3   6   58.94   14.17
   7   3  -5   13.99   11.00
   7   3  -5   15.50   15.13
   7  -3  -4   20.41   13.36
   7   3  -4   22.28   15.77
   7   3  -4   32.43   26.56
   7  -3  -3    5.76    4.86
   7   3  -3    6.62    7.38
   7   3  -3    8.70   10.29
  -7   3   3    8.33    8.92
   7  -3  -2    4.24    4.11
   7   3  -2    3.14    5.35
   7   3  -2    5.36    6.31
  -7   3   2    6.12    8.18
   7  -3  -1   15.74   11.03
   7   3  -1   15.67   11.64
   7   3  -1   16.94   15.02
  -7   3   1   17.90   13.13
   7  -3   0    2.90    4.23
   7   3   0    2.42    5.84
   7   3   0    0.47    1.40
  -7   3   0    3.17    6.29
  -7   3   0    4.21    4.73
   7  -3   1  215.32   35.65
   7   3   1  243.76   40.39
  -7   3  -1  254.91   42.36
  -7   3  -1  190.17   31.34
   7  -3   2   17.08   12.84
   7   3   2   14.97    7.31
  -7   3  -2   17.91    7.51
   7  -3   3   10.88    8.58
   7   3   3    7.66   12.25
  -7   3  -3    4.92    3.49
   7  -3   4   34.42   30.67
   7   3   4    0.45    1.84
   7  -3   5    1.59    5.04
   7   3   5    0.71    1.87
   7  -3   6    3.31    6.03
   7   3   6    0.64    1.63
   7  -3   7    5.77   14.58
   7   4 -10    2.57    3.92
   7   4 -10    0.87    2.58
   7   4  -9    8.20    5.96
   7   4  -8    1.38    2.89
   7   4  -8    2.98    4.00
  -7   4   8    0.20    1.10
   7   4  -7   11.28    6.59
   7   4  -7    8.16    9.44
  -7   4   7    0.17    1.75
   7   4  -6    4.71    4.84
   7   4  -6    4.09    6.26
  -7   4   6    4.80    5.27
   7   4  -5    5.55    4.57
   7   4  -5    8.64    7.95
  -7   4   5    6.33    5.82
   7   4  -4   97.94   15.91
   7   4  -4  109.54   61.37
  -7   4   4  117.74   19.26
   7   4  -3   11.19    7.01
   7   4  -3   12.43   16.53
  -7   4   3   16.02    9.74
   7   4  -2   58.58   12.28
   7   4  -2   57.15   43.81
  -7   4   2   67.60   15.20
   7   4  -1    1.29    3.04
   7   4  -1    2.27    2.24
  -7   4   1    5.40    6.63
   7   4   0    0.85    2.18
   7   4   0    0.33    0.92
  -7   4   0   32.65   10.56
  -7   4   0   26.96    8.80
   7   4   1    0.67    1.50
  -7   4  -1   28.10    9.02
  -7   4  -1   21.02    7.19
   7   4   2    0.45    1.39
  -7   4  -2   25.39    8.01
  -7   4  -2   19.19    6.65
   7   4   3    0.25    1.61
  -7   4  -3   28.13    7.58
  -7   4  -3   23.22    6.66
   7  -4   5   32.76    6.73
   7   5  -9    0.65    2.18
   7   5  -8    0.32    0.93
   7   5  -8    0.22    2.73
   7   5  -7    0.55    1.10
   7   5  -7    2.65    3.78
  -7   5   7    1.27    1.82
   7   5  -6    0.22    0.92
   7   5  -6    4.38    7.17
  -7   5   6    3.34    3.22
   7   5  -5    0.86    1.63
   7   5  -5   23.82   32.18
  -7   5   5   30.61    9.19
   7   5  -4    2.24    2.49
   7   5  -4    9.62   10.71
  -7   5   4   14.08    8.48
   7   5  -3    0.02    0.82
   7   5  -3   27.26   25.30
  -7   5   3   34.86   11.19
   7   5  -2    0.68    1.86
   7   5  -2    2.52    3.71
  -7   5   2    0.86    6.41
   7   5  -1    0.38    1.26
   7   5  -1    0.13    0.65
  -7   5   1    1.82    4.86
  -7   5   1    5.38    4.67
  -7   5   0   80.77   14.41
  -7   5   0   59.72   11.36
  -7   5  -1   14.93    7.02
  -7   5  -1   11.03    5.55
  -7   5  -2   45.73   10.21
  -7   5  -2   33.68    8.20
  -7   5  -3    7.63    3.76
  -7   5  -3    8.61    4.01
  -7   5  -4   12.95   11.08
   7   6  -7    9.88   25.73
   7   6  -6   14.44   22.97
  -7   6   6    0.58    1.39
   7   6  -5    7.18   15.89
  -7   6   5    9.86    5.49
   7   6  -4   35.52   24.25
  -7   6   4   42.63   10.58
  -7   6   3   65.65   13.18
  -7   6   3   51.55   10.64
  -7   6   2   58.99   11.99
  -7   6   2   46.40   10.29
  -7   6   1   50.05   10.99
  -7   6   1   41.96    9.53
  -7   6   0   12.69    5.98
  -7   6   0   12.15    5.53
  -7   6  -1    1.18    3.46
  -7   6  -1    1.13    2.80
  -7   6  -2   15.90    5.31
  -7   6  -2   14.22    4.92
  -7   6  -3    1.82    2.16
  -7   7   3    2.69    9.29
  -7   7   3   11.25    4.76
  -7   7   2   86.53   11.49
  -7   7   2   79.38   10.48
  -7   7   1    0.47    2.25
  -7   7   1    1.70    2.47
  -7   7   0   69.91   10.16
   8   0  -9    1.12    1.46
   8   0  -8    5.80    3.74
   8   0  -7    2.12    3.10
   8   0  -6    0.15    2.11
   8   0  -5    2.25    3.45
   8   0  -4   11.58    6.41
   8   0  -3    5.24    5.09
   8   0  -2    1.36    5.04
   8   0  -1    2.27    4.68
   8   0   0    1.40    3.20
   8   0   1    5.70   11.61
  -8   0  -1    3.42    2.92
   8   0   2    0.24    1.82
   8   0   3    8.88   13.29
   8   0   4    0.56    2.53
   8   0   5    0.54    1.74
   8   1  -9    1.26    1.90
   8  -1  -8    1.70    1.65
   8   1  -8    7.61    4.49
   8  -1  -7    3.82    2.77
   8   1  -7    5.35    4.02
   8  -1  -6    1.79    2.19
   8   1  -6    2.88    3.38
   8  -1  -5    4.21    3.69
   8   1  -5    5.79    5.08
   8  -1  -4   28.55    8.72
   8   1  -4   31.37    9.60
   8  -1  -3   72.64   13.95
   8   1  -3   85.97   15.12
   8  -1  -2   48.32   10.95
   8   1  -2   50.32   11.51
   8  -1  -1  210.75   21.41
   8   1  -1  224.53   24.18
   8  -1   0  150.05   19.93
   8   1   0  162.75   20.68
  -8   1   0  160.50   18.79
   8  -1   1   23.96   22.54
   8   1   1   17.71   28.46
  -8   1  -1   20.05    6.11
   8  -1   2   11.90   10.30
   8   1   2    8.91   14.15
   8  -1   3    1.54    3.71
   8   1   3    2.53    4.88
   8  -1   4    0.41    2.92
   8   1   4    0.33    2.31
   8  -1   5   28.74    6.51
   8   1   5   23.97    6.50
   8   2  -9    1.91    2.34
   8   2  -8   41.72    8.44
  -8   2   8    0.45    1.26
   8   2  -7    9.64    5.63
  -8   2   7    9.34    5.32
  -8   2   6   63.47   12.57
   8   2  -5    9.71    5.51
  -8   2   5   11.14    6.30
   8  -2  -4    8.00    3.95
   8   2  -4    7.30    6.53
  -8   2   4   16.62    8.91
   8  -2  -3   54.36   10.04
   8   2  -3   66.24   13.89
  -8   2   3   63.81   12.64
   8  -2  -2   69.90   11.40
   8   2  -2   81.28   14.28
  -8   2   2   90.82   17.10
   8  -2  -1   40.42   10.91
   8   2  -1   51.07   12.18
  -8   2   1   51.39   11.46
   8  -2   0    2.45    6.36
   8   2   0    4.32    4.59
  -8   2   0    4.96    4.63
   8  -2   1   32.32   30.48
   8   2   1   37.84   10.39
   8  -2   2   17.94   14.77
   8   2   2   11.03   24.58
  -8   2  -2   10.66    4.12
   8  -2   3    0.62    2.12
   8   2   3    1.09    4.99
   8   2   4    3.54   16.93
   8   3  -8    6.36    4.31
   8   3  -7    1.58    2.82
  -8   3   7    0.74    2.39
   8   3  -6    6.39    5.00
  -8   3   6    3.80    4.29
   8   3  -5   11.96    6.51
  -8   3   5   13.90    8.25
   8   3  -4   31.95    8.71
  -8   3   4   39.38   10.14
   8   3  -3   15.22    7.31
  -8   3   3   17.49    7.25
   8   3  -2   26.71    8.07
  -8   3   2   24.34    8.49
   8  -3  -1    0.20    0.46
   8   3  -1    2.10    3.62
  -8   3   1    2.05    3.05
   8  -3   0    0.68    2.08
   8   3   0    0.15    2.45
  -8   3   0    2.64    3.21
   8   3   1   21.05    6.29
  -8   3  -1   26.85    7.06
   8  -3   2    1.06    2.71
   8   3   2    0.50    1.62
  -8   3  -2    3.06    2.16
   8   3   3    0.20    1.74
   8   4  -6    0.15    1.75
   8   4  -5    6.63    4.53
   8   4  -5    9.57    6.77
  -8   4   5   16.88    6.45
   8   4  -4    0.33    1.43
  -8   4   4    9.12    5.44
   8   4  -3    0.11    1.10
  -8   4   3   55.50   10.64
   8   4  -2    0.28    0.98
  -8   4   2   12.70    5.71
  -8   4   2    6.64    3.51
   8   4  -1    0.41    1.05
  -8   4   1    9.45    5.57
  -8   4   1    2.00    1.96
   8   4   0    0.34    0.97
  -8   4   0   21.69    6.43
  -8   4  -1    1.25    1.88
  -8   5   3   21.57    6.52
  -8   5   2   14.94    5.18
  -8   5   1    1.48    2.19
   0   0   0    0.00    0.00
;
_shelx_hkl_checksum               36270
_shelx_SHELXL_version_number      '2014/7'
_olex2_submission_special_instructions 'No special instructions were received'
